# Supplementary material
Source: PubMed Central journal article supplement (PMC6045438)
Supplement: NIHMS937029-supplement-1.pdf [file NIHMS937029-supplement-1.pdf]

| <b>Gene Target</b>                                           | <b>Forward Primer</b>                | <b>Reverse Primer</b>               |
|--------------------------------------------------------------|--------------------------------------|-------------------------------------|
| Toll Like Receptor 3 ( <i>TLR3</i> )                         | 5`-GTA TTG CCT GGT TTG TTA ATT GG-3` | 5`-AAG AGT TCA AAG GGG GCA CT-3`    |
| DExD/H-Box Helicase 58 ( <i>DDX58</i> )                      | 5`-TGT GCT CCT ACA GGT TGT GGA-3`    | 5`-CAC TGG GAT CTG ATT CGC AAA A-3` |
| Interferon Induced With Helicase C Domain 1 ( <i>IFIH1</i> ) | 5`-TCG AAT GGG TAT TCC ACA GAC G-3`  | 5`-GTG GCG ACT GTC CTC TGA A-3`     |
| Z-DNA Binding Protein 1 ( <i>ZBP1</i> )                      | 5`-AAA GCA TGG ACG ATT TAC CG-3`     | 5`-CAT GTT GAT TGG ATT GTG CTG-3`   |
| Interferon Gamma Inducible Protein 16 ( <i>IFI16</i> )       | 5`-TAG AAG TGC CAG CGT AAC TCC-3`    | 5`-TGA TTG TGG TCA GTC GTC CAT-3`   |
| ISG15 Ubiquitin-Like Modifier ( <i>ISG15</i> )               | 5`-CGC AGA TCA CCC AGA AGA TCG-3`    | 5`-TTC GTC GCA TTT GTC CAC CA-3`    |
| 2'-5'-Oligoadenylate Synthetase 1 ( <i>OAS1</i> )            | 5`-TGT CCA AGG TGG TAA AGG GTG-3`    | 5`-CCG GCG ATT TAA CTG ATC CTG-3`   |
| Paired Box 2 ( <i>PAX2</i> )                                 | 5`-CCC AGC GTC TCT TCC ATC AA-3`     | 5`-CGT GCT GGG AAC AAT GGT GT-3`    |
| Beta-2-Microglobulin ( <i>B2M</i> )                          | 5`-CTC TCT CTT TCT GGC CTG GAG-3`    | 5`-TCT GCT GGA TGA CGT GAG TA-3`    |

Supplementary Table S I: Primers used for Quantitative RT-PCR (RT-qPCR) Analysis.

**Supplementary Table S II. Antiviral innate immune response genes showing differentially high expression in the corpus and cauda (gene expression values as FPKM, average of 3 donors).**

| <b>Function</b>       | <b>Gene ID</b> | <b>Gene name</b>                            | <b>Caput</b> | <b>Corpus</b> | <b>Cauda</b> |
|-----------------------|----------------|---------------------------------------------|--------------|---------------|--------------|
| Viral sensors         | TLR3           | Toll Like Receptor 3                        | 3.81         | 15.21         | 12.59        |
|                       | DDX58          | DExD/H-Box Helicase 58                      | 6.04         | 61.94         | 53.32        |
|                       | IFIH1          | Interferon Induced With Helicase C Domain 1 | 5.79         | 56.75         | 48.15        |
|                       | IFI16          | Interferon Gamma Inducible Protein 16       | 179.41       | 1317.23       | 1374.18      |
| Adaptor proteins      | MYD88          | Myeloid Differentiation Primary Response 88 | 17.19        | 53.38         | 47.17        |
| Signaling proteins    | IRAK2          | Interleukin 1 Receptor Associated Kinase 2  | 9.80         | 20.50         | 22.80        |
| Transcription factors | IRF7           | Interferon Regulatory Factor 7              | 18.36        | 72.75         | 63.85        |
| Antiviral proteins    | MX1            | MX Dynamin Like GTPase 1                    | 30.50        | 356.53        | 328.37       |
|                       | MX2            | MX Dynamin Like GTPase 2                    | 0.24         | 14.80         | 12.56        |
|                       | OAS1           | 2'-5'-Oligoadenylate Synthetase 1           | 14.88        | 119.39        | 105.24       |
|                       | OAS2           | 2'-5'-Oligoadenylate Synthetase 2           | 3.40         | 65.54         | 58.71        |
|                       | OAS3           | 2'-5'-Oligoadenylate Synthetase 3           | 9.91         | 63.16         | 55.36        |
|                       | OASL           | 2'-5'-Oligoadenylate Synthetase Like        | 4.45         | 136.16        | 114.59       |
| Chemokines/ Cytokines | CXCL10         | C-X-C Motif Chemokine Ligand 10             | 1.39         | 41.38         | 46.64        |
|                       | CXCL11         | C-X-C Motif Chemokine Ligand 11             | 0.47         | 15.70         | 16.34        |

| <b>Sample</b>                   | <b>Sequenced Reads</b> | <b>Aligned Reads</b> |
|---------------------------------|------------------------|----------------------|
| Caput Control siRNA Replicate 1 | 29,311,312             | 28,942,321           |
| Caput Control siRNA Replicate 2 | 25,927,224             | 25,597,885           |
| Caput Control siRNA Replicate 3 | 27,820,503             | 27,413,955           |
| Caput PAX2 siRNA Replicate 1    | 27,652,710             | 27,317,469           |
| Caput PAX2 siRNA Replicate 2    | 26,764,439             | 26,424,323           |
| Caput PAX2 siRNA Replicate 3    | 29,708,349             | 29,319,785           |

Supplementary Table S III. Reads (sequenced and aligned) for the RNA-seq experiments.

**Supplementary Table S IV. List of genes differentially expressed by at least 1.3-fold (FPKM  $\geq$  0.3) following siRNA mediated PAX2-knockdown in Caput HEE cells.**

| Gene Symbol           | NC si  | PAX2 si | log2 fold change | Fold change  | p value |  | Gene Symbol                                        | NC si | PAX2 si | log2 fold change | Fold change | p value |
|-----------------------|--------|---------|------------------|--------------|---------|--|----------------------------------------------------|-------|---------|------------------|-------------|---------|
| AMH                   | 22.31  | 0.22    | -6.65            | <b>100.3</b> | 5.0E-05 |  | MIR205HG                                           | 0.30  | 5.13    | 4.11             | <b>17.2</b> | 5.0E-05 |
| MIR374C               | 33.44  | 1.59    | -4.40            | <b>21.1</b>  | 5.0E-05 |  | MIR17,MIR17HG,MIR18A,MIR19A,MIR19B1,MIR20A,MIR92A1 | 1.10  | 16.80   | 3.93             | <b>15.2</b> | 5.0E-05 |
| IL33                  | 3.61   | 0.38    | -3.25            | <b>9.5</b>   | 5.0E-05 |  | RAB11FIP4                                          | 1.34  | 12.43   | 3.22             | <b>9.3</b>  | 5.0E-05 |
| DAZL                  | 0.50   | 0.07    | -2.88            | <b>7.4</b>   | 5.0E-05 |  | TOMM40L                                            | 4.92  | 32.19   | 2.71             | <b>6.5</b>  | 5.0E-05 |
| SLC25A15              | 37.49  | 5.19    | -2.85            | <b>7.2</b>   | 5.0E-05 |  | SLC16A9                                            | 0.11  | 0.70    | 2.67             | <b>6.4</b>  | 5.0E-05 |
| LOC284454,MIR24-2     | 48.27  | 6.70    | -2.85            | <b>7.2</b>   | 5.0E-05 |  | C7orf61                                            | 0.20  | 1.13    | 2.52             | <b>5.7</b>  | 3.6E-03 |
| C3AR1                 | 0.69   | 0.10    | -2.80            | <b>7.0</b>   | 2.5E-04 |  | SFTA1P                                             | 0.26  | 1.34    | 2.35             | <b>5.1</b>  | 1.3E-03 |
| DUOX2                 | 1.30   | 0.22    | -2.55            | <b>5.9</b>   | 5.0E-05 |  | C7orf57                                            | 0.35  | 1.31    | 1.91             | <b>3.8</b>  | 5.0E-05 |
| PDCD4                 | 128.91 | 32.93   | -1.97            | <b>3.9</b>   | 5.0E-05 |  | HP                                                 | 0.19  | 0.68    | 1.87             | <b>3.6</b>  | 2.0E-03 |
| SST                   | 4.61   | 1.24    | -1.89            | <b>3.7</b>   | 5.0E-05 |  | GPR64                                              | 0.22  | 0.79    | 1.86             | <b>3.6</b>  | 5.0E-05 |
| SECTM1                | 25.74  | 7.06    | -1.87            | <b>3.6</b>   | 5.0E-05 |  | MRAP2                                              | 0.24  | 0.79    | 1.72             | <b>3.3</b>  | 5.0E-05 |
| LYG2                  | 1.49   | 0.42    | -1.82            | <b>3.5</b>   | 3.5E-04 |  | LTF                                                | 19.73 | 64.27   | 1.70             | <b>3.3</b>  | 5.0E-05 |
| CYP3A7,CYP3A7-CYP3AP1 | 0.42   | 0.12    | -1.79            | <b>3.5</b>   | 1.1E-03 |  | SERPINA3                                           | 3.42  | 10.62   | 1.63             | <b>3.1</b>  | 5.0E-05 |
| FAM150B               | 1.95   | 0.57    | -1.77            | <b>3.4</b>   | 4.0E-04 |  | CDK14                                              | 1.32  | 4.02    | 1.61             | <b>3.0</b>  | 5.0E-05 |
| C12orf74              | 1.17   | 0.35    | -1.72            | <b>3.3</b>   | 1.5E-04 |  | TMEM246                                            | 0.45  | 1.33    | 1.56             | <b>3.0</b>  | 5.0E-05 |
| CYP2B6                | 1.07   | 0.34    | -1.65            | <b>3.1</b>   | 5.0E-05 |  | SLC44A2                                            | 11.30 | 33.03   | 1.55             | <b>2.9</b>  | 5.0E-05 |
| HPSE                  | 9.38   | 3.00    | -1.64            | <b>3.1</b>   | 5.0E-05 |  | C11orf96                                           | 1.16  | 3.34    | 1.53             | <b>2.9</b>  | 5.0E-05 |
| IFITM2                | 343.60 | 110.75  | -1.63            | <b>3.1</b>   | 5.0E-05 |  | A4GNT                                              | 0.21  | 0.62    | 1.53             | <b>2.9</b>  | 9.5E-04 |
| SYNGAP1               | 9.22   | 3.06    | -1.59            | <b>3.0</b>   | 5.0E-05 |  | GINS2                                              | 0.96  | 2.64    | 1.45             | <b>2.7</b>  | 5.0E-05 |
| SLC51B                | 1.23   | 0.43    | -1.53            | <b>2.9</b>   | 1.4E-03 |  | PLIN4                                              | 0.27  | 0.73    | 1.44             | <b>2.7</b>  | 5.0E-05 |
| IRF8                  | 2.51   | 0.88    | -1.51            | <b>2.8</b>   | 5.0E-05 |  | CNN1                                               | 1.96  | 5.28    | 1.43             | <b>2.7</b>  | 5.0E-05 |
| FGF14                 | 1.63   | 0.59    | -1.47            | <b>2.8</b>   | 5.0E-05 |  | NKD1                                               | 0.17  | 0.46    | 1.43             | <b>2.7</b>  | 5.0E-05 |
| CD7                   | 0.67   | 0.24    | -1.46            | <b>2.7</b>   | 5.5E-03 |  | SLC16A14                                           | 0.41  | 1.12    | 1.43             | <b>2.7</b>  | 5.0E-05 |
| MT1H                  | 5.39   | 1.99    | -1.44            | <b>2.7</b>   | 1.3E-03 |  | MYBL2                                              | 4.06  | 10.78   | 1.41             | <b>2.7</b>  | 5.0E-05 |
| GBP1P1                | 2.46   | 0.91    | -1.43            | <b>2.7</b>   | 5.0E-05 |  | RELN                                               | 0.40  | 1.03    | 1.37             | <b>2.6</b>  | 5.0E-05 |
| CXCL11                | 5.15   | 1.91    | -1.43            | <b>2.7</b>   | 5.0E-05 |  | TAAR6                                              | 0.39  | 0.98    | 1.34             | <b>2.5</b>  | 1.3E-03 |
| GPR141                | 1.53   | 0.58    | -1.40            | <b>2.6</b>   | 5.0E-05 |  | KLF16,REXO1                                        | 39.94 | 99.93   | 1.32             | <b>2.5</b>  | 5.0E-05 |
| CCR8                  | 1.24   | 0.47    | -1.40            | <b>2.6</b>   | 5.0E-05 |  | AK7                                                | 0.29  | 0.72    | 1.31             | <b>2.5</b>  | 5.0E-05 |
| IL1RN                 | 21.70  | 8.43    | -1.36            | <b>2.6</b>   | 5.0E-05 |  | NIPAL4                                             | 0.36  | 0.88    | 1.28             | <b>2.4</b>  | 5.0E-05 |

|           |         |        |       |            |         |  |              |       |        |      |            |         |
|-----------|---------|--------|-------|------------|---------|--|--------------|-------|--------|------|------------|---------|
| ZBP1      | 10.06   | 3.94   | -1.35 | <b>2.6</b> | 5.0E-05 |  | TMEM100      | 0.76  | 1.83   | 1.28 | <b>2.4</b> | 5.0E-05 |
| ANK1      | 0.78    | 0.30   | -1.35 | <b>2.6</b> | 5.0E-05 |  | E2F1         | 0.71  | 1.69   | 1.25 | <b>2.4</b> | 5.0E-05 |
| MRC2      | 10.74   | 4.22   | -1.35 | <b>2.5</b> | 5.0E-05 |  | LOC100131825 | 1.47  | 3.45   | 1.24 | <b>2.4</b> | 5.0E-05 |
| FLJ37035  | 0.48    | 0.19   | -1.33 | <b>2.5</b> | 1.6E-03 |  | PTGDS        | 0.96  | 2.25   | 1.23 | <b>2.3</b> | 1.0E-03 |
| CD38      | 1.28    | 0.52   | -1.31 | <b>2.5</b> | 5.0E-05 |  | TPM4         | 87.94 | 204.02 | 1.21 | <b>2.3</b> | 5.0E-05 |
| ENTPD3    | 9.14    | 3.73   | -1.29 | <b>2.5</b> | 5.0E-05 |  | LOC646329    | 0.36  | 0.82   | 1.21 | <b>2.3</b> | 5.0E-05 |
| GABRQ     | 2.25    | 0.93   | -1.28 | <b>2.4</b> | 5.0E-05 |  | DENND2A      | 0.20  | 0.47   | 1.20 | <b>2.3</b> | 5.0E-05 |
| KRT15     | 1.42    | 0.59   | -1.26 | <b>2.4</b> | 5.0E-05 |  | THBD         | 6.91  | 15.85  | 1.20 | <b>2.3</b> | 5.0E-05 |
| BATF2     | 8.56    | 3.62   | -1.24 | <b>2.4</b> | 5.0E-05 |  | ACVR2B-AS1   | 0.40  | 0.90   | 1.19 | <b>2.3</b> | 3.5E-04 |
| SOX3      | 0.97    | 0.41   | -1.24 | <b>2.4</b> | 1.0E-04 |  | HMGB2        | 14.99 | 34.18  | 1.19 | <b>2.3</b> | 5.0E-05 |
| CKB       | 130.78  | 56.13  | -1.22 | <b>2.3</b> | 5.0E-05 |  | UPP1         | 53.48 | 119.72 | 1.16 | <b>2.2</b> | 5.0E-05 |
| HCG26     | 1.85    | 0.80   | -1.22 | <b>2.3</b> | 2.3E-03 |  | CDC45        | 1.05  | 2.33   | 1.15 | <b>2.2</b> | 5.0E-05 |
| ZNF385D   | 1.50    | 0.65   | -1.22 | <b>2.3</b> | 5.0E-05 |  | GANAB        | 70.43 | 156.30 | 1.15 | <b>2.2</b> | 5.0E-05 |
| MASP1     | 2.80    | 1.21   | -1.21 | <b>2.3</b> | 5.0E-05 |  | ZNF702P      | 2.44  | 5.42   | 1.15 | <b>2.2</b> | 5.0E-05 |
| SAMHD1    | 66.86   | 29.13  | -1.20 | <b>2.3</b> | 5.0E-05 |  | LOC399815    | 0.52  | 1.15   | 1.15 | <b>2.2</b> | 5.0E-05 |
| WFDC12    | 1.09    | 0.48   | -1.20 | <b>2.3</b> | 1.0E-02 |  | ZNF616       | 1.14  | 2.52   | 1.15 | <b>2.2</b> | 5.0E-05 |
| IFIT2     | 82.83   | 36.52  | -1.18 | <b>2.3</b> | 5.0E-05 |  | KCNJ2        | 0.34  | 0.74   | 1.14 | <b>2.2</b> | 5.0E-05 |
| TNFSF13B  | 4.36    | 1.92   | -1.18 | <b>2.3</b> | 5.0E-05 |  | SCN5A        | 0.24  | 0.52   | 1.14 | <b>2.2</b> | 5.0E-05 |
| CXCL10    | 15.61   | 6.99   | -1.16 | <b>2.2</b> | 5.0E-05 |  | AURKB        | 4.56  | 10.01  | 1.13 | <b>2.2</b> | 5.0E-05 |
| SLC2A2    | 0.44    | 0.20   | -1.15 | <b>2.2</b> | 1.0E-04 |  | AGPHD1       | 0.71  | 1.54   | 1.12 | <b>2.2</b> | 2.1E-03 |
| MIRLET7I  | 39.08   | 17.66  | -1.15 | <b>2.2</b> | 5.0E-03 |  | RRM2         | 3.95  | 8.60   | 1.12 | <b>2.2</b> | 5.0E-05 |
| LRRC73    | 0.81    | 0.37   | -1.15 | <b>2.2</b> | 5.2E-03 |  | FLJ46906     | 0.67  | 1.46   | 1.11 | <b>2.2</b> | 2.6E-03 |
| OASL      | 38.06   | 17.33  | -1.13 | <b>2.2</b> | 5.0E-05 |  | BIRC5        | 3.79  | 8.17   | 1.11 | <b>2.2</b> | 5.0E-05 |
| TG        | 3.07    | 1.40   | -1.13 | <b>2.2</b> | 5.0E-05 |  | HABP4        | 2.24  | 4.80   | 1.10 | <b>2.1</b> | 5.0E-05 |
| LINC00473 | 6.85    | 3.12   | -1.13 | <b>2.2</b> | 5.0E-05 |  | RBP4         | 0.74  | 1.58   | 1.10 | <b>2.1</b> | 1.9E-03 |
| MYO1C     | 54.55   | 24.93  | -1.13 | <b>2.2</b> | 5.0E-05 |  | CCDC80       | 18.91 | 40.41  | 1.10 | <b>2.1</b> | 5.0E-05 |
| CD83      | 1.23    | 0.56   | -1.12 | <b>2.2</b> | 5.0E-05 |  | DTL          | 0.61  | 1.30   | 1.09 | <b>2.1</b> | 5.0E-05 |
| CPSF1     | 77.16   | 35.68  | -1.11 | <b>2.2</b> | 5.0E-05 |  | CRTAC1       | 0.44  | 0.94   | 1.08 | <b>2.1</b> | 5.0E-05 |
| CD177     | 1.20    | 0.56   | -1.11 | <b>2.2</b> | 5.0E-05 |  | ZNF367       | 0.36  | 0.75   | 1.08 | <b>2.1</b> | 5.0E-05 |
| PI3       | 195.16  | 90.83  | -1.10 | <b>2.1</b> | 5.0E-05 |  | IGFBP5       | 4.35  | 9.16   | 1.07 | <b>2.1</b> | 5.0E-05 |
| LUM       | 44.20   | 20.58  | -1.10 | <b>2.1</b> | 5.0E-05 |  | VSNL1        | 1.13  | 2.37   | 1.07 | <b>2.1</b> | 5.0E-05 |
| EBNA1BP2  | 40.74   | 18.98  | -1.10 | <b>2.1</b> | 5.0E-05 |  | PTX3         | 3.24  | 6.80   | 1.07 | <b>2.1</b> | 5.0E-05 |
| IL11      | 6.48    | 3.03   | -1.10 | <b>2.1</b> | 5.0E-05 |  | MT1L         | 79.37 | 163.67 | 1.04 | <b>2.1</b> | 5.0E-05 |
| IFI6      | 1343.57 | 633.81 | -1.08 | <b>2.1</b> | 5.0E-05 |  | ZCWPW1       | 1.04  | 2.14   | 1.04 | <b>2.1</b> | 4.5E-04 |
| MLLT11    | 4.63    | 2.19   | -1.08 | <b>2.1</b> | 5.0E-05 |  | MAOB         | 1.56  | 3.20   | 1.04 | <b>2.1</b> | 5.0E-05 |
| COL14A1   | 1.39    | 0.66   | -1.08 | <b>2.1</b> | 5.0E-05 |  | TYMS         | 2.44  | 4.99   | 1.03 | <b>2.0</b> | 1.1E-02 |
| SCG5      | 3.16    | 1.50   | -1.07 | <b>2.1</b> | 5.0E-05 |  | SERPINA1     | 56.61 | 115.33 | 1.03 | <b>2.0</b> | 5.0E-05 |
| TNFAIP6   | 5.23    | 2.49   | -1.07 | <b>2.1</b> | 5.0E-05 |  | MCM10        | 0.33  | 0.68   | 1.03 | <b>2.0</b> | 5.0E-05 |

|           |         |        |       |            |         |  |              |        |        |      |            |         |
|-----------|---------|--------|-------|------------|---------|--|--------------|--------|--------|------|------------|---------|
| ISG15     | 1151.10 | 551.81 | -1.06 | <b>2.1</b> | 5.0E-05 |  | PLIN5        | 2.39   | 4.85   | 1.02 | <b>2.0</b> | 5.0E-05 |
| ARID3B    | 2.38    | 1.15   | -1.06 | <b>2.1</b> | 5.0E-05 |  | LGALS2       | 0.73   | 1.48   | 1.02 | <b>2.0</b> | 2.4E-03 |
| HCP5      | 14.83   | 7.15   | -1.05 | <b>2.1</b> | 5.0E-05 |  | SHCBP1       | 3.18   | 6.42   | 1.01 | <b>2.0</b> | 5.0E-05 |
| CA9       | 3.77    | 1.82   | -1.05 | <b>2.1</b> | 5.0E-05 |  | AOX1         | 1.78   | 3.59   | 1.01 | <b>2.0</b> | 5.0E-05 |
| CPXM1     | 97.55   | 47.16  | -1.05 | <b>2.1</b> | 5.0E-05 |  | GFRA1        | 1.88   | 3.78   | 1.01 | <b>2.0</b> | 5.0E-05 |
| HIST2H2BE | 1.18    | 0.57   | -1.04 | <b>2.1</b> | 5.0E-05 |  | LOC100506421 | 1.25   | 2.51   | 1.01 | <b>2.0</b> | 5.0E-05 |
| TMEM104   | 7.96    | 3.88   | -1.04 | <b>2.1</b> | 5.0E-05 |  | MEGF6        | 0.31   | 0.62   | 1.00 | <b>2.0</b> | 5.0E-05 |
| ATP8B2    | 3.57    | 1.75   | -1.03 | <b>2.0</b> | 5.0E-05 |  | EXO1         | 0.42   | 0.83   | 0.98 | <b>2.0</b> | 5.0E-05 |
| NT5C3     | 49.65   | 24.49  | -1.02 | <b>2.0</b> | 5.0E-05 |  | CADM3,DARC   | 3.44   | 6.80   | 0.98 | <b>2.0</b> | 5.0E-05 |
| HLA-F     | 52.16   | 25.74  | -1.02 | <b>2.0</b> | 5.0E-05 |  | ASH1L        | 9.46   | 18.68  | 0.98 | <b>2.0</b> | 2.0E-04 |
| DPP4      | 60.17   | 29.83  | -1.01 | <b>2.0</b> | 5.0E-05 |  | LTBP1        | 0.36   | 0.72   | 0.98 | <b>2.0</b> | 5.0E-05 |
| MX2       | 5.88    | 2.92   | -1.01 | <b>2.0</b> | 5.0E-05 |  | LINC00672    | 0.71   | 1.39   | 0.97 | <b>2.0</b> | 5.0E-05 |
| HERC5     | 47.22   | 23.47  | -1.01 | <b>2.0</b> | 5.0E-05 |  | SLC29A4      | 0.50   | 0.98   | 0.97 | <b>2.0</b> | 5.0E-05 |
| C3orf55   | 1.61    | 0.80   | -1.00 | <b>2.0</b> | 9.0E-04 |  | CDCA3        | 2.27   | 4.40   | 0.95 | <b>1.9</b> | 5.0E-05 |
| SMTNL1    | 1.47    | 0.73   | -1.00 | <b>2.0</b> | 2.1E-03 |  | EEF1A2       | 2.16   | 4.16   | 0.95 | <b>1.9</b> | 5.0E-05 |
| RBM11     | 0.62    | 0.31   | -1.00 | <b>2.0</b> | 1.4E-03 |  | CCNB2        | 8.45   | 16.26  | 0.94 | <b>1.9</b> | 1.2E-02 |
| PLSCR2    | 0.57    | 0.28   | -1.00 | <b>2.0</b> | 1.0E-02 |  | CHST14       | 3.97   | 7.63   | 0.94 | <b>1.9</b> | 5.0E-05 |
| SLC38A11  | 0.48    | 0.24   | -1.00 | <b>2.0</b> | 1.1E-02 |  | TESC         | 1.30   | 2.48   | 0.93 | <b>1.9</b> | 2.0E-04 |
| BRSK1     | 0.91    | 0.46   | -0.99 | <b>2.0</b> | 5.0E-05 |  | DEPDC1       | 2.98   | 5.67   | 0.93 | <b>1.9</b> | 5.0E-05 |
| RSAD2     | 102.89  | 51.82  | -0.99 | <b>2.0</b> | 5.0E-05 |  | YBX2         | 1.44   | 2.74   | 0.93 | <b>1.9</b> | 1.5E-04 |
| IL6       | 198.40  | 100.44 | -0.98 | <b>2.0</b> | 5.0E-05 |  | MESDC2       | 25.74  | 48.97  | 0.93 | <b>1.9</b> | 5.0E-05 |
| C8orf34   | 0.90    | 0.46   | -0.97 | <b>2.0</b> | 5.0E-05 |  | ZNF678       | 0.73   | 1.39   | 0.92 | <b>1.9</b> | 5.0E-05 |
| TRPV4     | 3.50    | 1.79   | -0.97 | <b>2.0</b> | 5.0E-05 |  | LOC100133612 | 0.34   | 0.64   | 0.92 | <b>1.9</b> | 2.7E-03 |
| CHPF2     | 90.48   | 46.21  | -0.97 | <b>2.0</b> | 5.0E-05 |  | EPHB6        | 0.91   | 1.73   | 0.92 | <b>1.9</b> | 5.0E-05 |
| ADAM28    | 11.86   | 6.06   | -0.97 | <b>2.0</b> | 5.0E-05 |  | TNFSF14      | 1.23   | 2.31   | 0.92 | <b>1.9</b> | 5.0E-05 |
| TMEM171   | 5.20    | 2.66   | -0.97 | <b>2.0</b> | 5.0E-05 |  | ZSCAN5A      | 0.87   | 1.64   | 0.91 | <b>1.9</b> | 5.0E-05 |
| ENPEP     | 1.07    | 0.55   | -0.97 | <b>2.0</b> | 5.0E-05 |  | MYL9         | 7.47   | 14.06  | 0.91 | <b>1.9</b> | 5.0E-05 |
| ITPRIPL1  | 0.99    | 0.51   | -0.95 | <b>1.9</b> | 4.5E-04 |  | FAM65B       | 0.38   | 0.71   | 0.91 | <b>1.9</b> | 5.0E-05 |
| H1FO      | 61.19   | 31.82  | -0.94 | <b>1.9</b> | 5.0E-05 |  | WFDC2        | 153.49 | 288.43 | 0.91 | <b>1.9</b> | 5.0E-05 |
| NEFL      | 1.91    | 1.00   | -0.94 | <b>1.9</b> | 5.0E-05 |  | CENPF        | 4.58   | 8.58   | 0.91 | <b>1.9</b> | 5.0E-05 |
| HSD17B2   | 10.73   | 5.62   | -0.93 | <b>1.9</b> | 5.0E-05 |  | PRSS23       | 9.05   | 16.96  | 0.91 | <b>1.9</b> | 5.0E-05 |
| PRKAR2B   | 1.83    | 0.96   | -0.93 | <b>1.9</b> | 5.0E-05 |  | SLC43A2      | 10.02  | 18.78  | 0.91 | <b>1.9</b> | 5.0E-05 |
| MUC13     | 6.23    | 3.27   | -0.93 | <b>1.9</b> | 5.0E-05 |  | SLIT2        | 0.84   | 1.57   | 0.91 | <b>1.9</b> | 5.0E-05 |
| SYT11     | 1.98    | 1.04   | -0.93 | <b>1.9</b> | 5.0E-05 |  | TAF1D        | 144.87 | 271.37 | 0.91 | <b>1.9</b> | 5.0E-05 |
| SCARB2    | 122.03  | 64.10  | -0.93 | <b>1.9</b> | 5.0E-05 |  | GFPT2        | 0.36   | 0.68   | 0.90 | <b>1.9</b> | 3.0E-04 |
| IL22RA1   | 2.10    | 1.10   | -0.93 | <b>1.9</b> | 5.0E-05 |  | ENSA         | 41.26  | 77.08  | 0.90 | <b>1.9</b> | 5.0E-05 |
| PFKFB4    | 4.44    | 2.33   | -0.93 | <b>1.9</b> | 5.0E-05 |  | TMEM233      | 0.36   | 0.67   | 0.90 | <b>1.9</b> | 7.9E-03 |
| EVC       | 99.48   | 52.27  | -0.93 | <b>1.9</b> | 5.0E-05 |  | FBN2         | 1.23   | 2.29   | 0.90 | <b>1.9</b> | 5.0E-05 |

|           |        |       |       |            |         |                |       |       |      |            |         |
|-----------|--------|-------|-------|------------|---------|----------------|-------|-------|------|------------|---------|
| NECAB2    | 1.16   | 0.61  | -0.93 | <b>1.9</b> | 3.5E-04 | ZNF704         | 0.27  | 0.49  | 0.89 | <b>1.9</b> | 5.0E-05 |
| VGF       | 1.11   | 0.58  | -0.93 | <b>1.9</b> | 1.5E-04 | ZNF135         | 1.51  | 2.79  | 0.89 | <b>1.8</b> | 5.0E-05 |
| FAM84A    | 27.10  | 14.28 | -0.92 | <b>1.9</b> | 5.0E-05 | ARHGAP19,SLIT1 | 1.22  | 2.26  | 0.88 | <b>1.8</b> | 5.0E-05 |
| NCALD     | 16.81  | 8.91  | -0.92 | <b>1.9</b> | 5.0E-05 | RFTN1          | 2.28  | 4.20  | 0.88 | <b>1.8</b> | 5.0E-05 |
| HHEX      | 0.98   | 0.52  | -0.91 | <b>1.9</b> | 7.0E-04 | PRIM1          | 2.35  | 4.34  | 0.88 | <b>1.8</b> | 5.0E-05 |
| ISG20     | 80.79  | 43.08 | -0.91 | <b>1.9</b> | 5.0E-05 | SIGLEC15       | 0.65  | 1.19  | 0.88 | <b>1.8</b> | 5.0E-05 |
| AZGP1     | 0.71   | 0.38  | -0.91 | <b>1.9</b> | 1.1E-02 | ZNF582-AS1     | 0.72  | 1.32  | 0.88 | <b>1.8</b> | 1.1E-03 |
| BLNK      | 1.10   | 0.59  | -0.89 | <b>1.9</b> | 4.5E-04 | CENPH          | 4.11  | 7.56  | 0.88 | <b>1.8</b> | 5.0E-05 |
| SEMA7A    | 25.83  | 13.92 | -0.89 | <b>1.9</b> | 5.0E-05 | MSRB3          | 1.89  | 3.47  | 0.88 | <b>1.8</b> | 5.0E-05 |
| FAT2      | 2.80   | 1.51  | -0.89 | <b>1.9</b> | 5.0E-05 | E2F8           | 0.64  | 1.18  | 0.87 | <b>1.8</b> | 5.0E-05 |
| FAM71F2   | 1.02   | 0.55  | -0.89 | <b>1.8</b> | 3.7E-03 | CCNE2          | 0.67  | 1.23  | 0.87 | <b>1.8</b> | 5.0E-05 |
| PNMAL1    | 8.27   | 4.48  | -0.88 | <b>1.8</b> | 5.0E-05 | SLC46A3        | 2.82  | 5.14  | 0.87 | <b>1.8</b> | 5.0E-05 |
| TINAG     | 0.56   | 0.30  | -0.88 | <b>1.8</b> | 5.7E-03 | HRCT1          | 0.65  | 1.19  | 0.87 | <b>1.8</b> | 8.9E-03 |
| KCNN3     | 0.40   | 0.22  | -0.88 | <b>1.8</b> | 5.0E-05 | UHRF1          | 1.56  | 2.83  | 0.86 | <b>1.8</b> | 5.0E-05 |
| LOC400043 | 13.84  | 7.53  | -0.88 | <b>1.8</b> | 5.0E-05 | CHI3L2         | 3.99  | 7.26  | 0.86 | <b>1.8</b> | 5.0E-05 |
| ENPP4     | 7.86   | 4.29  | -0.87 | <b>1.8</b> | 5.0E-05 | ARHGDIB        | 5.52  | 10.01 | 0.86 | <b>1.8</b> | 5.0E-05 |
| GHR       | 0.46   | 0.25  | -0.87 | <b>1.8</b> | 5.0E-05 | LOC100128770   | 1.14  | 2.05  | 0.85 | <b>1.8</b> | 9.1E-03 |
| FER1L6    | 1.10   | 0.60  | -0.87 | <b>1.8</b> | 5.0E-05 | CREG2          | 1.13  | 2.04  | 0.85 | <b>1.8</b> | 1.5E-04 |
| DOK3      | 0.98   | 0.54  | -0.87 | <b>1.8</b> | 2.5E-04 | TUBB4A         | 0.35  | 0.63  | 0.85 | <b>1.8</b> | 3.5E-03 |
| CYP3A5    | 9.43   | 5.21  | -0.86 | <b>1.8</b> | 5.0E-05 | NEIL3          | 0.53  | 0.96  | 0.85 | <b>1.8</b> | 5.0E-05 |
| TRIM69    | 2.21   | 1.22  | -0.86 | <b>1.8</b> | 5.0E-05 | HMG2           | 49.09 | 88.19 | 0.85 | <b>1.8</b> | 5.0E-05 |
| PTPRH     | 0.69   | 0.38  | -0.86 | <b>1.8</b> | 5.0E-05 | HHIP           | 4.49  | 8.07  | 0.84 | <b>1.8</b> | 5.0E-05 |
| PSMB9     | 51.94  | 28.71 | -0.86 | <b>1.8</b> | 5.0E-05 | CNTN6          | 0.26  | 0.46  | 0.84 | <b>1.8</b> | 5.0E-04 |
| POU2F2    | 6.17   | 3.43  | -0.85 | <b>1.8</b> | 5.0E-05 | ZNF138         | 2.01  | 3.59  | 0.84 | <b>1.8</b> | 5.0E-05 |
| CTSC      | 84.10  | 46.94 | -0.84 | <b>1.8</b> | 5.0E-05 | CD14           | 4.45  | 7.96  | 0.84 | <b>1.8</b> | 5.0E-05 |
| MFAP3L    | 6.10   | 3.41  | -0.84 | <b>1.8</b> | 5.0E-05 | SLC2A4RG       | 9.89  | 17.68 | 0.84 | <b>1.8</b> | 5.0E-05 |
| SAMD9L    | 20.54  | 11.48 | -0.84 | <b>1.8</b> | 5.0E-05 | ZNF680         | 2.14  | 3.82  | 0.84 | <b>1.8</b> | 5.0E-05 |
| KRT222    | 0.71   | 0.40  | -0.84 | <b>1.8</b> | 5.6E-03 | ZNF610         | 0.47  | 0.84  | 0.84 | <b>1.8</b> | 8.5E-04 |
| ACE2      | 1.17   | 0.65  | -0.84 | <b>1.8</b> | 5.0E-05 | CASP7          | 11.58 | 20.65 | 0.83 | <b>1.8</b> | 5.0E-05 |
| CYP4F3    | 0.49   | 0.27  | -0.84 | <b>1.8</b> | 1.7E-03 | FAM111B        | 0.69  | 1.22  | 0.83 | <b>1.8</b> | 5.0E-05 |
| SLC15A3   | 22.34  | 12.50 | -0.84 | <b>1.8</b> | 5.0E-05 | LRP3           | 1.13  | 2.02  | 0.83 | <b>1.8</b> | 5.0E-05 |
| SV2A      | 6.70   | 3.75  | -0.84 | <b>1.8</b> | 5.0E-05 | SERPINA5       | 0.59  | 1.05  | 0.83 | <b>1.8</b> | 1.0E-04 |
| FAM196B   | 1.72   | 0.96  | -0.83 | <b>1.8</b> | 5.0E-05 | EDIL3          | 0.47  | 0.83  | 0.83 | <b>1.8</b> | 2.0E-04 |
| UBE2L6    | 131.02 | 73.47 | -0.83 | <b>1.8</b> | 5.0E-05 | CDKN3          | 6.94  | 12.30 | 0.82 | <b>1.8</b> | 5.0E-05 |
| ARL6IP1   | 94.66  | 53.09 | -0.83 | <b>1.8</b> | 5.0E-05 | LAT            | 0.75  | 1.32  | 0.82 | <b>1.8</b> | 1.1E-03 |
| BST2      | 138.80 | 77.85 | -0.83 | <b>1.8</b> | 5.0E-05 | JPX            | 6.14  | 10.85 | 0.82 | <b>1.8</b> | 5.0E-05 |
| IFIT1     | 134.74 | 75.62 | -0.83 | <b>1.8</b> | 5.0E-05 | STX12          | 10.87 | 19.19 | 0.82 | <b>1.8</b> | 5.0E-05 |
| CDKN1C    | 26.47  | 14.87 | -0.83 | <b>1.8</b> | 5.0E-05 | FBXL19-AS1     | 1.12  | 1.98  | 0.82 | <b>1.8</b> | 5.0E-05 |

|           |        |        |       |            |         |                      |       |       |      |            |         |
|-----------|--------|--------|-------|------------|---------|----------------------|-------|-------|------|------------|---------|
| EXOC3L4   | 2.78   | 1.56   | -0.83 | <b>1.8</b> | 5.0E-05 | HNRNPA1P33,LINC00842 | 3.12  | 5.47  | 0.81 | <b>1.8</b> | 5.0E-04 |
| TPGS1     | 4.73   | 2.66   | -0.83 | <b>1.8</b> | 5.0E-05 | TM4SF1               | 48.17 | 84.41 | 0.81 | <b>1.8</b> | 5.0E-05 |
| MFSD2A    | 33.68  | 18.97  | -0.83 | <b>1.8</b> | 5.0E-05 | LINC00565            | 0.31  | 0.54  | 0.80 | <b>1.7</b> | 4.5E-03 |
| GID4      | 5.60   | 3.16   | -0.83 | <b>1.8</b> | 5.0E-05 | CENPA                | 2.21  | 3.84  | 0.80 | <b>1.7</b> | 5.0E-05 |
| HSD17B7P2 | 1.07   | 0.61   | -0.82 | <b>1.8</b> | 1.9E-03 | SPAG5                | 2.62  | 4.56  | 0.80 | <b>1.7</b> | 5.0E-05 |
| SCG2      | 0.45   | 0.26   | -0.82 | <b>1.8</b> | 4.5E-03 | NT5M                 | 0.45  | 0.78  | 0.80 | <b>1.7</b> | 9.1E-03 |
| ST3GAL5   | 5.22   | 2.96   | -0.82 | <b>1.8</b> | 5.0E-05 | PRC1                 | 8.12  | 14.11 | 0.80 | <b>1.7</b> | 5.0E-05 |
| AK5       | 9.80   | 5.56   | -0.82 | <b>1.8</b> | 5.0E-05 | PMEPA1               | 46.54 | 80.68 | 0.79 | <b>1.7</b> | 5.0E-05 |
| LOC115110 | 0.63   | 0.36   | -0.82 | <b>1.8</b> | 3.2E-03 | PIF1                 | 0.95  | 1.65  | 0.79 | <b>1.7</b> | 5.0E-05 |
| RTP4      | 36.15  | 20.53  | -0.82 | <b>1.8</b> | 5.0E-05 | NCAM1                | 2.40  | 4.15  | 0.79 | <b>1.7</b> | 5.0E-05 |
| SH3BP1    | 11.36  | 6.49   | -0.81 | <b>1.8</b> | 5.0E-05 | EMID1                | 0.35  | 0.60  | 0.79 | <b>1.7</b> | 7.4E-03 |
| KRT23     | 6.82   | 3.91   | -0.80 | <b>1.7</b> | 5.0E-05 | SORL1                | 1.05  | 1.81  | 0.79 | <b>1.7</b> | 5.0E-05 |
| ANPEP     | 80.31  | 46.04  | -0.80 | <b>1.7</b> | 5.0E-05 | PTCHD4               | 0.60  | 1.04  | 0.79 | <b>1.7</b> | 8.2E-03 |
| IQCD      | 65.85  | 37.75  | -0.80 | <b>1.7</b> | 5.0E-05 | G3BP2                | 32.55 | 56.13 | 0.79 | <b>1.7</b> | 5.0E-05 |
| ADAMTS6   | 0.57   | 0.33   | -0.80 | <b>1.7</b> | 5.0E-05 | ROBO1                | 0.78  | 1.34  | 0.79 | <b>1.7</b> | 5.0E-05 |
| PIPOX     | 0.69   | 0.40   | -0.80 | <b>1.7</b> | 1.3E-03 | PIP                  | 1.97  | 3.39  | 0.78 | <b>1.7</b> | 3.7E-03 |
| CMPK2     | 70.12  | 40.38  | -0.80 | <b>1.7</b> | 5.0E-05 | SLC13A5              | 2.33  | 4.02  | 0.78 | <b>1.7</b> | 5.0E-05 |
| LRP2BP    | 0.82   | 0.47   | -0.79 | <b>1.7</b> | 1.5E-03 | GYG2                 | 0.32  | 0.55  | 0.78 | <b>1.7</b> | 1.3E-03 |
| LAP3      | 135.87 | 78.50  | -0.79 | <b>1.7</b> | 5.0E-05 | VWA2                 | 1.39  | 2.38  | 0.78 | <b>1.7</b> | 5.0E-05 |
| ETV7      | 9.99   | 5.77   | -0.79 | <b>1.7</b> | 5.0E-05 | MYLK4                | 0.27  | 0.46  | 0.78 | <b>1.7</b> | 5.0E-05 |
| STAT1     | 438.81 | 254.24 | -0.79 | <b>1.7</b> | 5.0E-05 | LIX1                 | 0.78  | 1.35  | 0.78 | <b>1.7</b> | 5.0E-05 |
| RASGEF1B  | 1.93   | 1.12   | -0.79 | <b>1.7</b> | 5.0E-05 | LOC100506844         | 1.85  | 3.17  | 0.78 | <b>1.7</b> | 1.1E-03 |
| TMPRSS4   | 4.53   | 2.63   | -0.79 | <b>1.7</b> | 5.0E-05 | ZNF876P              | 0.80  | 1.37  | 0.78 | <b>1.7</b> | 5.0E-05 |
| SP140     | 1.98   | 1.15   | -0.78 | <b>1.7</b> | 1.5E-03 | SLC7A14              | 1.00  | 1.72  | 0.78 | <b>1.7</b> | 5.0E-05 |
| CTSL1P2   | 1.12   | 0.65   | -0.78 | <b>1.7</b> | 7.7E-03 | MEX3A                | 2.95  | 5.06  | 0.78 | <b>1.7</b> | 5.0E-05 |
| AMBP      | 4.84   | 2.83   | -0.78 | <b>1.7</b> | 5.0E-05 | CENPK                | 2.02  | 3.45  | 0.77 | <b>1.7</b> | 1.5E-04 |
| GLIPR1L1  | 0.75   | 0.44   | -0.78 | <b>1.7</b> | 9.0E-03 | SLC5A5               | 0.46  | 0.78  | 0.77 | <b>1.7</b> | 1.5E-04 |
| DCDC2     | 3.52   | 2.05   | -0.78 | <b>1.7</b> | 1.2E-02 | TCOF1                | 4.09  | 6.96  | 0.77 | <b>1.7</b> | 5.0E-05 |
| CCSER1    | 0.54   | 0.32   | -0.77 | <b>1.7</b> | 5.0E-04 | ZNF17                | 1.46  | 2.48  | 0.77 | <b>1.7</b> | 5.0E-05 |
| F12       | 1.80   | 1.06   | -0.77 | <b>1.7</b> | 5.0E-05 | MEX3D                | 4.89  | 8.30  | 0.76 | <b>1.7</b> | 5.0E-05 |
| RPS6KB1   | 9.64   | 5.66   | -0.77 | <b>1.7</b> | 5.0E-05 | CYP24A1              | 0.66  | 1.13  | 0.76 | <b>1.7</b> | 5.0E-05 |
| NAGS      | 3.07   | 1.80   | -0.77 | <b>1.7</b> | 5.0E-05 | SERPINA4             | 0.59  | 0.99  | 0.76 | <b>1.7</b> | 2.4E-03 |
| KCNJ8     | 0.62   | 0.37   | -0.77 | <b>1.7</b> | 2.5E-03 | PLCE1                | 0.28  | 0.48  | 0.76 | <b>1.7</b> | 5.0E-05 |
| WISP1     | 1.01   | 0.60   | -0.77 | <b>1.7</b> | 5.0E-05 | LINC00278            | 3.79  | 6.42  | 0.76 | <b>1.7</b> | 5.0E-05 |
| IFIT3     | 210.44 | 123.70 | -0.77 | <b>1.7</b> | 5.0E-05 | CDCA5                | 1.92  | 3.26  | 0.76 | <b>1.7</b> | 5.0E-05 |
| TBX18     | 18.11  | 10.67  | -0.76 | <b>1.7</b> | 5.0E-05 | MYBL1                | 0.74  | 1.25  | 0.75 | <b>1.7</b> | 5.0E-05 |
| MAP2K6    | 8.88   | 5.25   | -0.76 | <b>1.7</b> | 5.0E-05 | GALNT9               | 3.15  | 5.32  | 0.75 | <b>1.7</b> | 5.0E-05 |



|              |         |        |       |            |         |               |       |       |      |            |         |
|--------------|---------|--------|-------|------------|---------|---------------|-------|-------|------|------------|---------|
| IL18R1       | 1.78    | 1.05   | -0.76 | <b>1.7</b> | 5.0E-05 | MIR100HG      | 1.53  | 2.58  | 0.75 | <b>1.7</b> | 5.0E-05 |
| CDK8         | 8.61    | 5.09   | -0.76 | <b>1.7</b> | 5.0E-05 | SERTAD4       | 0.75  | 1.26  | 0.75 | <b>1.7</b> | 5.0E-05 |
| GDF15        | 216.84  | 128.37 | -0.76 | <b>1.7</b> | 5.0E-05 | LOC283177     | 2.13  | 3.59  | 0.75 | <b>1.7</b> | 5.0E-05 |
| SERPINB7     | 7.34    | 4.35   | -0.75 | <b>1.7</b> | 5.0E-05 | NOLC1         | 16.05 | 27.02 | 0.75 | <b>1.7</b> | 5.0E-05 |
| LIPE         | 1.51    | 0.89   | -0.75 | <b>1.7</b> | 1.1E-02 | SGIP1         | 1.26  | 2.12  | 0.75 | <b>1.7</b> | 5.0E-05 |
| BAI2         | 0.53    | 0.32   | -0.75 | <b>1.7</b> | 4.5E-04 | SLC6A16       | 0.34  | 0.58  | 0.75 | <b>1.7</b> | 2.0E-03 |
| SDS          | 2.32    | 1.38   | -0.75 | <b>1.7</b> | 5.0E-05 | P2RY6         | 1.53  | 2.58  | 0.75 | <b>1.7</b> | 5.0E-05 |
| LOC440894    | 0.64    | 0.38   | -0.75 | <b>1.7</b> | 4.6E-03 | CXCL14        | 1.15  | 1.92  | 0.75 | <b>1.7</b> | 5.0E-05 |
| KLKB1        | 1.16    | 0.69   | -0.75 | <b>1.7</b> | 5.0E-05 | ATP2A1        | 0.44  | 0.74  | 0.75 | <b>1.7</b> | 8.5E-04 |
| ST6GALNAC4   | 41.85   | 24.86  | -0.75 | <b>1.7</b> | 5.0E-05 | ZNF461        | 1.49  | 2.50  | 0.74 | <b>1.7</b> | 3.1E-03 |
| PTAFR        | 3.10    | 1.84   | -0.75 | <b>1.7</b> | 5.0E-05 | GINS4         | 1.08  | 1.81  | 0.74 | <b>1.7</b> | 5.0E-05 |
| CHRD         | 13.64   | 8.12   | -0.75 | <b>1.7</b> | 5.0E-05 | BCAN          | 1.21  | 2.03  | 0.74 | <b>1.7</b> | 5.0E-05 |
| TRPM3        | 3.39    | 2.02   | -0.75 | <b>1.7</b> | 5.0E-05 | ASPM          | 2.26  | 3.77  | 0.74 | <b>1.7</b> | 5.0E-05 |
| OAS2         | 60.77   | 36.21  | -0.75 | <b>1.7</b> | 5.0E-05 | MLF1IP        | 1.90  | 3.16  | 0.74 | <b>1.7</b> | 5.0E-05 |
| IZUMO4       | 5.87    | 3.51   | -0.74 | <b>1.7</b> | 5.0E-05 | MLXIPL        | 0.54  | 0.90  | 0.74 | <b>1.7</b> | 3.5E-04 |
| CDV3         | 89.04   | 53.23  | -0.74 | <b>1.7</b> | 5.0E-05 | ZNF85         | 1.09  | 1.82  | 0.74 | <b>1.7</b> | 5.0E-05 |
| SLC15A1      | 7.55    | 4.53   | -0.74 | <b>1.7</b> | 5.0E-05 | CASC5         | 1.32  | 2.20  | 0.73 | <b>1.7</b> | 5.0E-05 |
| LOC100127888 | 10.14   | 6.10   | -0.73 | <b>1.7</b> | 2.9E-03 | ACO1          | 22.71 | 37.74 | 0.73 | <b>1.7</b> | 5.0E-05 |
| MBLAC1       | 1.09    | 0.65   | -0.73 | <b>1.7</b> | 6.7E-03 | CENPV         | 5.35  | 8.89  | 0.73 | <b>1.7</b> | 2.6E-03 |
| ACMSD        | 2.30    | 1.38   | -0.73 | <b>1.7</b> | 5.0E-05 | ANLN          | 6.91  | 11.47 | 0.73 | <b>1.7</b> | 5.0E-05 |
| RASGRP3      | 2.80    | 1.69   | -0.73 | <b>1.7</b> | 5.0E-05 | ZNF433        | 0.94  | 1.56  | 0.73 | <b>1.7</b> | 5.0E-05 |
| IFIH1        | 41.93   | 25.26  | -0.73 | <b>1.7</b> | 5.0E-05 | COL23A1       | 0.77  | 1.28  | 0.73 | <b>1.7</b> | 5.0E-05 |
| KRTAP2-3     | 17.74   | 10.69  | -0.73 | <b>1.7</b> | 5.0E-05 | ERV3-1,ZNF117 | 2.59  | 4.29  | 0.73 | <b>1.7</b> | 5.0E-05 |
| ARTN         | 1.07    | 0.65   | -0.73 | <b>1.7</b> | 5.9E-03 | KIF18B        | 1.38  | 2.28  | 0.72 | <b>1.7</b> | 5.0E-05 |
| TMCC3        | 4.81    | 2.90   | -0.73 | <b>1.7</b> | 5.0E-05 | RASSF2        | 0.46  | 0.76  | 0.72 | <b>1.7</b> | 5.0E-05 |
| GSR          | 115.06  | 69.44  | -0.73 | <b>1.7</b> | 5.0E-05 | FOXC2         | 1.02  | 1.68  | 0.72 | <b>1.7</b> | 1.0E-04 |
| PLEKHG7      | 0.99    | 0.60   | -0.73 | <b>1.7</b> | 5.0E-05 | PBK           | 4.09  | 6.75  | 0.72 | <b>1.7</b> | 5.0E-05 |
| HEPHL1       | 0.78    | 0.48   | -0.72 | <b>1.7</b> | 5.0E-05 | PSMG3-AS1     | 1.00  | 1.65  | 0.72 | <b>1.7</b> | 5.0E-05 |
| PRR16        | 3.86    | 2.34   | -0.72 | <b>1.7</b> | 5.0E-05 | TNFRSF10D     | 6.59  | 10.87 | 0.72 | <b>1.6</b> | 5.0E-05 |
| HLA-B,HLA-C  | 1422.09 | 862.53 | -0.72 | <b>1.6</b> | 5.0E-05 | TRPM8         | 0.31  | 0.51  | 0.72 | <b>1.6</b> | 1.0E-04 |
| ATP1A1       | 265.79  | 161.22 | -0.72 | <b>1.6</b> | 5.0E-05 | COL1A2        | 0.72  | 1.18  | 0.72 | <b>1.6</b> | 5.0E-05 |
| AGT          | 0.59    | 0.36   | -0.72 | <b>1.6</b> | 3.5E-03 | TP53I11       | 1.08  | 1.78  | 0.72 | <b>1.6</b> | 1.0E-02 |
| RDH10        | 30.88   | 18.75  | -0.72 | <b>1.6</b> | 5.0E-05 | RGN           | 1.29  | 2.13  | 0.72 | <b>1.6</b> | 5.0E-05 |
| CCL20        | 429.63  | 261.02 | -0.72 | <b>1.6</b> | 5.0E-05 | LAMA4         | 0.42  | 0.69  | 0.72 | <b>1.6</b> | 1.0E-02 |
| H2AFV        | 33.09   | 20.11  | -0.72 | <b>1.6</b> | 5.0E-05 | KIAA1211L     | 0.73  | 1.20  | 0.72 | <b>1.6</b> | 5.0E-05 |
| POLR3G       | 4.51    | 2.75   | -0.72 | <b>1.6</b> | 2.9E-03 | DNM1P46       | 0.33  | 0.54  | 0.72 | <b>1.6</b> | 1.0E-03 |
| SLC35G2      | 2.70    | 1.65   | -0.72 | <b>1.6</b> | 3.5E-04 | TOP2A         | 10.68 | 17.58 | 0.72 | <b>1.6</b> | 5.0E-05 |
| NLR5         | 12.08   | 7.36   | -0.71 | <b>1.6</b> | 5.0E-05 | ADSSL1        | 1.58  | 2.60  | 0.72 | <b>1.6</b> | 5.0E-05 |

|                 |        |        |       |            |         |                             |        |        |      |            |         |
|-----------------|--------|--------|-------|------------|---------|-----------------------------|--------|--------|------|------------|---------|
| RNF19B          | 17.77  | 10.86  | -0.71 | <b>1.6</b> | 5.0E-05 | CENPM                       | 2.00   | 3.28   | 0.72 | <b>1.6</b> | 5.5E-04 |
| PIK3AP1         | 39.34  | 24.07  | -0.71 | <b>1.6</b> | 5.0E-05 | KIF2C                       | 5.41   | 8.90   | 0.72 | <b>1.6</b> | 5.0E-05 |
| MGC16121,MIR424 | 7.57   | 4.63   | -0.71 | <b>1.6</b> | 6.3E-03 | KIAA0226L                   | 0.58   | 0.96   | 0.72 | <b>1.6</b> | 5.0E-05 |
| LRRC31          | 0.46   | 0.28   | -0.71 | <b>1.6</b> | 1.1E-02 | RPSAP58                     | 0.60   | 0.99   | 0.72 | <b>1.6</b> | 7.6E-03 |
| MXD1            | 5.07   | 3.11   | -0.71 | <b>1.6</b> | 5.0E-05 | FAM86FP                     | 0.61   | 1.00   | 0.71 | <b>1.6</b> | 7.5E-04 |
| PAPPA2          | 0.47   | 0.29   | -0.70 | <b>1.6</b> | 5.0E-05 | CARHSP1                     | 20.25  | 33.17  | 0.71 | <b>1.6</b> | 5.0E-05 |
| ROR2            | 1.69   | 1.04   | -0.70 | <b>1.6</b> | 5.0E-05 | DLGAP5                      | 3.42   | 5.61   | 0.71 | <b>1.6</b> | 5.0E-05 |
| CRYM            | 17.38  | 10.71  | -0.70 | <b>1.6</b> | 5.0E-05 | LINC00707                   | 0.71   | 1.16   | 0.71 | <b>1.6</b> | 5.0E-05 |
| SLC17A1         | 3.31   | 2.04   | -0.70 | <b>1.6</b> | 5.0E-05 | SHH                         | 3.59   | 5.87   | 0.71 | <b>1.6</b> | 5.0E-05 |
| OAS1            | 155.86 | 96.22  | -0.70 | <b>1.6</b> | 5.0E-05 | CDKN2C                      | 3.37   | 5.49   | 0.71 | <b>1.6</b> | 5.0E-05 |
| SNCA            | 1.92   | 1.19   | -0.69 | <b>1.6</b> | 5.0E-05 | C1orf115                    | 2.19   | 3.57   | 0.71 | <b>1.6</b> | 5.0E-05 |
| C7orf60         | 8.69   | 5.38   | -0.69 | <b>1.6</b> | 5.0E-05 | LOXL4                       | 1.49   | 2.43   | 0.71 | <b>1.6</b> | 5.0E-05 |
| CEP192          | 5.56   | 3.45   | -0.69 | <b>1.6</b> | 5.0E-05 | ZDHHC18                     | 9.85   | 16.05  | 0.70 | <b>1.6</b> | 5.0E-05 |
| MRPL42          | 16.29  | 10.12  | -0.69 | <b>1.6</b> | 5.0E-05 | PLK4                        | 1.37   | 2.23   | 0.70 | <b>1.6</b> | 5.0E-05 |
| SLC10A3         | 9.98   | 6.22   | -0.68 | <b>1.6</b> | 5.0E-05 | COL4A1                      | 143.95 | 234.44 | 0.70 | <b>1.6</b> | 5.0E-05 |
| MAPRE3          | 9.18   | 5.73   | -0.68 | <b>1.6</b> | 5.0E-05 | NCAPH                       | 1.40   | 2.27   | 0.70 | <b>1.6</b> | 5.0E-05 |
| USP18           | 58.90  | 36.75  | -0.68 | <b>1.6</b> | 5.0E-05 | C21orf58                    | 0.55   | 0.90   | 0.70 | <b>1.6</b> | 4.0E-04 |
| PDCD1LG2        | 1.35   | 0.84   | -0.68 | <b>1.6</b> | 5.0E-05 | JPH2                        | 0.65   | 1.05   | 0.70 | <b>1.6</b> | 1.0E-04 |
| SLCO4A1         | 30.38  | 18.97  | -0.68 | <b>1.6</b> | 5.0E-05 | CTGF                        | 27.66  | 44.93  | 0.70 | <b>1.6</b> | 5.0E-05 |
| TRPM6           | 0.42   | 0.26   | -0.68 | <b>1.6</b> | 5.0E-05 | LMNB1                       | 5.51   | 8.93   | 0.70 | <b>1.6</b> | 5.0E-05 |
| EFHA2           | 3.25   | 2.03   | -0.68 | <b>1.6</b> | 5.0E-05 | SEMA6B                      | 1.40   | 2.26   | 0.70 | <b>1.6</b> | 5.0E-05 |
| PHLPP2          | 5.29   | 3.31   | -0.67 | <b>1.6</b> | 5.0E-05 | ZNF253                      | 1.84   | 2.98   | 0.69 | <b>1.6</b> | 5.0E-05 |
| CD82            | 38.58  | 24.18  | -0.67 | <b>1.6</b> | 5.0E-05 | LPHN3                       | 3.14   | 5.08   | 0.69 | <b>1.6</b> | 5.0E-05 |
| MAPKAPK2        | 42.96  | 26.94  | -0.67 | <b>1.6</b> | 5.0E-05 | CYP4X1                      | 0.45   | 0.73   | 0.69 | <b>1.6</b> | 5.0E-03 |
| SPTLC3          | 11.89  | 7.46   | -0.67 | <b>1.6</b> | 5.0E-05 | NR6A1                       | 1.53   | 2.47   | 0.69 | <b>1.6</b> | 5.0E-05 |
| C8orf31         | 4.61   | 2.90   | -0.67 | <b>1.6</b> | 5.0E-05 | TUFT1                       | 9.31   | 15.05  | 0.69 | <b>1.6</b> | 5.0E-05 |
| ANKRD36BP1      | 17.83  | 11.23  | -0.67 | <b>1.6</b> | 5.0E-05 | ZNF177,ZNF559,ZNF559-ZNF177 | 2.90   | 4.69   | 0.69 | <b>1.6</b> | 5.0E-05 |
| IFI27           | 957.41 | 602.73 | -0.67 | <b>1.6</b> | 5.0E-05 | NUSAP1                      | 8.25   | 13.32  | 0.69 | <b>1.6</b> | 5.0E-05 |
| LHFPL3-AS2      | 5.84   | 3.68   | -0.66 | <b>1.6</b> | 5.0E-05 | TSC22D1                     | 24.14  | 38.94  | 0.69 | <b>1.6</b> | 5.0E-05 |
| LGALS9          | 59.64  | 37.66  | -0.66 | <b>1.6</b> | 5.0E-05 | SOCS3                       | 6.37   | 10.27  | 0.69 | <b>1.6</b> | 5.0E-05 |
| ATP8A2          | 29.23  | 18.47  | -0.66 | <b>1.6</b> | 5.0E-05 | HS6ST2                      | 0.40   | 0.64   | 0.69 | <b>1.6</b> | 4.0E-04 |
| KRT6A           | 3.28   | 2.07   | -0.66 | <b>1.6</b> | 5.0E-05 | SPON2                       | 0.45   | 0.73   | 0.69 | <b>1.6</b> | 6.2E-03 |
| C3orf67         | 2.58   | 1.63   | -0.66 | <b>1.6</b> | 5.0E-05 | ZNF43                       | 1.89   | 3.04   | 0.69 | <b>1.6</b> | 5.0E-05 |
| CHST1           | 0.53   | 0.33   | -0.66 | <b>1.6</b> | 2.1E-03 | ZNF525                      | 0.84   | 1.35   | 0.68 | <b>1.6</b> | 5.0E-05 |
| RENBP           | 4.62   | 2.93   | -0.66 | <b>1.6</b> | 5.0E-05 | ZNF101                      | 2.03   | 3.26   | 0.68 | <b>1.6</b> | 5.0E-05 |
| ZC4H2           | 3.54   | 2.24   | -0.66 | <b>1.6</b> | 5.0E-05 | ZNF681                      | 0.49   | 0.78   | 0.68 | <b>1.6</b> | 5.0E-05 |
| SERPINE2        | 19.45  | 12.34  | -0.66 | <b>1.6</b> | 5.0E-05 | SOSTDC1                     | 2.26   | 3.63   | 0.68 | <b>1.6</b> | 5.0E-05 |

|              |         |         |       |            |         |  |              |        |        |      |            |         |
|--------------|---------|---------|-------|------------|---------|--|--------------|--------|--------|------|------------|---------|
| WSB2         | 33.50   | 21.28   | -0.65 | <b>1.6</b> | 5.0E-05 |  | C4orf21      | 1.29   | 2.07   | 0.68 | <b>1.6</b> | 9.5E-04 |
| C16orf87     | 7.44    | 4.72    | -0.65 | <b>1.6</b> | 5.0E-05 |  | PRKCG        | 0.32   | 0.51   | 0.68 | <b>1.6</b> | 7.4E-03 |
| ALDH8A1      | 0.76    | 0.48    | -0.65 | <b>1.6</b> | 2.8E-03 |  | CDRT1        | 0.56   | 0.90   | 0.68 | <b>1.6</b> | 1.5E-04 |
| HELZ2        | 30.98   | 19.75   | -0.65 | <b>1.6</b> | 5.0E-05 |  | PER3         | 1.09   | 1.74   | 0.68 | <b>1.6</b> | 5.0E-05 |
| PHF15        | 9.78    | 6.24    | -0.65 | <b>1.6</b> | 5.0E-05 |  | NCAPG2       | 4.70   | 7.50   | 0.68 | <b>1.6</b> | 5.0E-05 |
| IFI35        | 121.53  | 77.51   | -0.65 | <b>1.6</b> | 5.0E-05 |  | CHI3L1       | 5.30   | 8.46   | 0.68 | <b>1.6</b> | 5.0E-05 |
| HAVCR2       | 0.94    | 0.60    | -0.65 | <b>1.6</b> | 1.1E-03 |  | CXCL6        | 68.60  | 109.51 | 0.67 | <b>1.6</b> | 5.0E-05 |
| APBA1        | 0.49    | 0.31    | -0.65 | <b>1.6</b> | 1.0E-04 |  | TFPI2        | 115.08 | 183.51 | 0.67 | <b>1.6</b> | 5.0E-05 |
| RGS22        | 0.50    | 0.32    | -0.65 | <b>1.6</b> | 1.3E-03 |  | TBX2         | 4.51   | 7.20   | 0.67 | <b>1.6</b> | 5.0E-05 |
| CATSPERB     | 4.12    | 2.63    | -0.65 | <b>1.6</b> | 5.0E-05 |  | C1QTNF6      | 3.82   | 6.10   | 0.67 | <b>1.6</b> | 5.0E-05 |
| RCOR1        | 9.69    | 6.19    | -0.65 | <b>1.6</b> | 5.0E-05 |  | NALCN        | 3.67   | 5.85   | 0.67 | <b>1.6</b> | 5.0E-05 |
| B2M          | 2273.96 | 1454.71 | -0.64 | <b>1.6</b> | 5.0E-05 |  | LPP          | 12.23  | 19.04  | 0.67 | <b>1.6</b> | 5.0E-05 |
| LAMA3        | 377.53  | 241.75  | -0.64 | <b>1.6</b> | 5.0E-05 |  | FIGF,PIR     | 9.78   | 15.53  | 0.67 | <b>1.6</b> | 6.6E-03 |
| STK24        | 51.91   | 33.26   | -0.64 | <b>1.6</b> | 5.0E-05 |  | KIF14        | 1.37   | 2.17   | 0.66 | <b>1.6</b> | 5.0E-05 |
| HOXC8        | 4.93    | 3.16    | -0.64 | <b>1.6</b> | 5.0E-05 |  | CEP55        | 4.59   | 7.28   | 0.66 | <b>1.6</b> | 5.0E-05 |
| CYP27A1      | 8.86    | 5.68    | -0.64 | <b>1.6</b> | 5.0E-05 |  | DEPDC7       | 0.94   | 1.49   | 0.66 | <b>1.6</b> | 4.5E-04 |
| GMPR         | 53.30   | 34.23   | -0.64 | <b>1.6</b> | 5.0E-05 |  | SYT12        | 3.66   | 5.79   | 0.66 | <b>1.6</b> | 5.0E-05 |
| ST3GAL4      | 18.14   | 11.67   | -0.64 | <b>1.6</b> | 5.0E-05 |  | GNB3         | 1.04   | 1.65   | 0.66 | <b>1.6</b> | 9.5E-04 |
| LAMP3        | 35.88   | 23.08   | -0.64 | <b>1.6</b> | 5.0E-05 |  | ANKAR        | 0.37   | 0.58   | 0.66 | <b>1.6</b> | 4.0E-04 |
| LOC653653    | 1.56    | 1.00    | -0.63 | <b>1.6</b> | 6.8E-03 |  | LOC728537    | 0.96   | 1.52   | 0.66 | <b>1.6</b> | 2.6E-03 |
| FAM222B      | 12.98   | 8.36    | -0.63 | <b>1.6</b> | 5.0E-05 |  | ADAM15       | 38.39  | 60.56  | 0.66 | <b>1.6</b> | 5.0E-05 |
| NR1H4        | 13.98   | 9.02    | -0.63 | <b>1.5</b> | 5.0E-05 |  | CKAP2L       | 2.16   | 3.40   | 0.65 | <b>1.6</b> | 5.0E-05 |
| DGKI         | 0.62    | 0.40    | -0.63 | <b>1.5</b> | 1.5E-04 |  | DYSF         | 2.58   | 4.06   | 0.65 | <b>1.6</b> | 5.0E-05 |
| LINC00630    | 4.85    | 3.14    | -0.63 | <b>1.5</b> | 1.7E-03 |  | CTSH         | 21.80  | 34.29  | 0.65 | <b>1.6</b> | 5.0E-05 |
| CHAC1        | 18.17   | 11.76   | -0.63 | <b>1.5</b> | 5.0E-05 |  | DOCK11       | 4.23   | 6.65   | 0.65 | <b>1.6</b> | 5.0E-05 |
| ANO8         | 5.68    | 3.68    | -0.63 | <b>1.5</b> | 1.0E-03 |  | PTK6         | 0.42   | 0.66   | 0.65 | <b>1.6</b> | 9.9E-03 |
| HIATL2       | 0.98    | 0.64    | -0.62 | <b>1.5</b> | 7.8E-03 |  | RSPO3        | 2.75   | 4.33   | 0.65 | <b>1.6</b> | 5.0E-05 |
| CCNA1        | 4.01    | 2.60    | -0.62 | <b>1.5</b> | 5.0E-05 |  | HS3ST2       | 2.23   | 3.51   | 0.65 | <b>1.6</b> | 5.0E-05 |
| UCA1         | 34.07   | 22.11   | -0.62 | <b>1.5</b> | 5.0E-05 |  | NCAPG        | 1.84   | 2.88   | 0.65 | <b>1.6</b> | 5.0E-03 |
| MYD88        | 25.90   | 16.81   | -0.62 | <b>1.5</b> | 5.0E-05 |  | HLF          | 2.78   | 4.34   | 0.65 | <b>1.6</b> | 5.0E-05 |
| LIPC         | 3.67    | 2.39    | -0.62 | <b>1.5</b> | 5.0E-05 |  | WDR62        | 0.84   | 1.32   | 0.64 | <b>1.6</b> | 5.0E-05 |
| PPP1R3F      | 0.81    | 0.53    | -0.62 | <b>1.5</b> | 1.5E-03 |  | C1orf233     | 1.65   | 2.57   | 0.64 | <b>1.6</b> | 5.0E-05 |
| CNIH3        | 13.97   | 9.10    | -0.62 | <b>1.5</b> | 5.0E-05 |  | CDH17        | 0.62   | 0.96   | 0.64 | <b>1.6</b> | 1.5E-04 |
| UBE2Z        | 52.14   | 33.99   | -0.62 | <b>1.5</b> | 5.0E-05 |  | AK8          | 0.86   | 1.35   | 0.64 | <b>1.6</b> | 4.7E-03 |
| ODF3B        | 12.19   | 7.95    | -0.62 | <b>1.5</b> | 5.0E-05 |  | IFT27        | 13.74  | 21.43  | 0.64 | <b>1.6</b> | 5.0E-05 |
| CFDP1        | 47.99   | 31.30   | -0.62 | <b>1.5</b> | 5.0E-05 |  | C18orf54     | 0.74   | 1.15   | 0.64 | <b>1.6</b> | 5.0E-05 |
| LOC100093631 | 0.54    | 0.35    | -0.61 | <b>1.5</b> | 3.9E-03 |  | ZNF540       | 0.52   | 0.82   | 0.64 | <b>1.6</b> | 1.3E-03 |
| PI4K2A       | 13.97   | 9.14    | -0.61 | <b>1.5</b> | 5.0E-05 |  | LOC100506233 | 5.25   | 8.18   | 0.64 | <b>1.6</b> | 5.0E-05 |

|                    |        |       |       |            |         |  |           |       |        |      |            |         |
|--------------------|--------|-------|-------|------------|---------|--|-----------|-------|--------|------|------------|---------|
| KCNK3              | 6.44   | 4.21  | -0.61 | <b>1.5</b> | 5.0E-05 |  | VOPP1     | 19.52 | 30.41  | 0.64 | <b>1.6</b> | 5.0E-05 |
| GPR115             | 1.09   | 0.71  | -0.61 | <b>1.5</b> | 5.0E-05 |  | GXYLT1    | 4.37  | 6.81   | 0.64 | <b>1.6</b> | 5.0E-05 |
| CYP2J2             | 3.73   | 2.45  | -0.61 | <b>1.5</b> | 5.0E-05 |  | FAM210B   | 7.44  | 11.57  | 0.64 | <b>1.6</b> | 5.0E-05 |
| OGDHL              | 10.07  | 6.60  | -0.61 | <b>1.5</b> | 5.0E-05 |  | GTSE1     | 2.21  | 3.43   | 0.64 | <b>1.6</b> | 5.0E-05 |
| CIDECF             | 8.22   | 5.39  | -0.61 | <b>1.5</b> | 5.0E-05 |  | ZNF214    | 0.74  | 1.14   | 0.64 | <b>1.6</b> | 2.5E-04 |
| ST6GALNAC5         | 2.47   | 1.62  | -0.61 | <b>1.5</b> | 5.0E-05 |  | LOC730091 | 0.40  | 0.62   | 0.63 | <b>1.6</b> | 3.6E-03 |
| CRMP1              | 29.40  | 19.28 | -0.61 | <b>1.5</b> | 5.0E-05 |  | ALDH5A1   | 0.53  | 0.82   | 0.63 | <b>1.6</b> | 5.0E-05 |
| MRPS30             | 19.70  | 12.93 | -0.61 | <b>1.5</b> | 5.0E-05 |  | ESPL1     | 1.20  | 1.86   | 0.63 | <b>1.6</b> | 5.0E-05 |
| IL19               | 3.74   | 2.45  | -0.61 | <b>1.5</b> | 1.5E-03 |  | KRBOX1    | 2.33  | 3.62   | 0.63 | <b>1.6</b> | 3.3E-03 |
| C19orf52           | 7.06   | 4.64  | -0.61 | <b>1.5</b> | 5.0E-05 |  | TP53TG1   | 5.88  | 9.12   | 0.63 | <b>1.6</b> | 1.2E-03 |
| NPAS2              | 17.70  | 11.64 | -0.61 | <b>1.5</b> | 5.0E-05 |  | B3GAT1    | 0.49  | 0.76   | 0.63 | <b>1.6</b> | 5.0E-04 |
| PPARGC1B           | 1.69   | 1.11  | -0.61 | <b>1.5</b> | 5.0E-05 |  | INHBA     | 2.93  | 4.54   | 0.63 | <b>1.5</b> | 5.0E-05 |
| EIF4EBP2           | 18.26  | 12.01 | -0.61 | <b>1.5</b> | 5.0E-05 |  | YJEFN3    | 1.27  | 1.96   | 0.63 | <b>1.5</b> | 1.0E-04 |
| FRS2               | 8.10   | 5.33  | -0.60 | <b>1.5</b> | 5.0E-05 |  | RRM1      | 6.71  | 10.39  | 0.63 | <b>1.5</b> | 5.0E-05 |
| BAIAP2L2           | 56.49  | 37.16 | -0.60 | <b>1.5</b> | 5.0E-05 |  | BICD2     | 7.96  | 12.32  | 0.63 | <b>1.5</b> | 5.0E-05 |
| PPFIBP2            | 2.45   | 1.61  | -0.60 | <b>1.5</b> | 5.0E-05 |  | C17orf97  | 2.18  | 3.38   | 0.63 | <b>1.5</b> | 5.0E-05 |
| CLIP3              | 2.95   | 1.94  | -0.60 | <b>1.5</b> | 5.0E-05 |  | PRDX4     | 67.12 | 103.91 | 0.63 | <b>1.5</b> | 5.0E-05 |
| C1orf85            | 36.03  | 23.74 | -0.60 | <b>1.5</b> | 5.0E-05 |  | ZNF682    | 0.87  | 1.35   | 0.63 | <b>1.5</b> | 5.0E-05 |
| SEN2               | 16.55  | 10.91 | -0.60 | <b>1.5</b> | 5.0E-05 |  | TK1       | 8.43  | 13.04  | 0.63 | <b>1.5</b> | 5.0E-05 |
| LOC100288974,MBL1P | 2.85   | 1.88  | -0.60 | <b>1.5</b> | 1.5E-04 |  | UBE2C     | 12.91 | 19.95  | 0.63 | <b>1.5</b> | 5.0E-05 |
| NUP54              | 15.55  | 10.26 | -0.60 | <b>1.5</b> | 5.0E-05 |  | HJURP     | 3.16  | 4.89   | 0.63 | <b>1.5</b> | 5.0E-05 |
| CTSS               | 14.84  | 9.79  | -0.60 | <b>1.5</b> | 5.0E-05 |  | CCNB1     | 14.38 | 22.20  | 0.63 | <b>1.5</b> | 5.0E-05 |
| CACNA1H            | 2.92   | 1.93  | -0.60 | <b>1.5</b> | 5.0E-05 |  | TCEA3     | 1.42  | 2.18   | 0.63 | <b>1.5</b> | 1.0E-04 |
| DNAJC13            | 19.59  | 12.93 | -0.60 | <b>1.5</b> | 5.0E-05 |  | MKI67     | 5.82  | 8.98   | 0.63 | <b>1.5</b> | 5.0E-05 |
| LGMN               | 50.73  | 33.51 | -0.60 | <b>1.5</b> | 5.0E-05 |  | ITGBL1    | 0.60  | 0.93   | 0.62 | <b>1.5</b> | 9.0E-04 |
| SSR3               | 120.50 | 79.60 | -0.60 | <b>1.5</b> | 5.0E-05 |  | SELP      | 0.35  | 0.54   | 0.62 | <b>1.5</b> | 3.6E-03 |
| EGLN1              | 50.95  | 33.71 | -0.60 | <b>1.5</b> | 5.0E-05 |  | AMIGO1    | 0.61  | 0.94   | 0.62 | <b>1.5</b> | 1.5E-03 |
| FOXH1              | 1.93   | 1.28  | -0.59 | <b>1.5</b> | 4.5E-04 |  | MGAT4A    | 9.87  | 15.21  | 0.62 | <b>1.5</b> | 5.0E-05 |
| HOMER1             | 4.42   | 2.93  | -0.59 | <b>1.5</b> | 5.0E-05 |  | LTBP2     | 30.61 | 47.06  | 0.62 | <b>1.5</b> | 5.0E-05 |
| LOC645638          | 5.23   | 3.47  | -0.59 | <b>1.5</b> | 5.7E-03 |  | CLDN2     | 36.51 | 56.13  | 0.62 | <b>1.5</b> | 5.0E-05 |
| PPIL3              | 18.52  | 12.28 | -0.59 | <b>1.5</b> | 5.0E-05 |  | SEMA6C    | 0.39  | 0.60   | 0.62 | <b>1.5</b> | 2.2E-03 |
| PNMA3              | 0.94   | 0.62  | -0.59 | <b>1.5</b> | 4.0E-04 |  | ZNF93     | 0.66  | 1.01   | 0.62 | <b>1.5</b> | 2.0E-04 |
| PIGR               | 55.13  | 36.65 | -0.59 | <b>1.5</b> | 5.0E-05 |  | CDCA8     | 2.97  | 4.56   | 0.62 | <b>1.5</b> | 5.0E-05 |
| DNER               | 1.03   | 0.69  | -0.59 | <b>1.5</b> | 5.0E-04 |  | CYP2U1    | 1.45  | 2.23   | 0.62 | <b>1.5</b> | 5.0E-05 |
| TMEM178B           | 12.62  | 8.40  | -0.59 | <b>1.5</b> | 5.0E-05 |  | PLCD1     | 2.85  | 4.37   | 0.62 | <b>1.5</b> | 5.0E-05 |
| WFDC5              | 1.95   | 1.30  | -0.59 | <b>1.5</b> | 9.8E-03 |  | PRR11     | 3.41  | 5.24   | 0.62 | <b>1.5</b> | 5.0E-05 |
| DTX3               | 3.19   | 2.13  | -0.59 | <b>1.5</b> | 5.0E-05 |  | ZNF675    | 1.98  | 3.04   | 0.62 | <b>1.5</b> | 5.0E-05 |

|             |         |         |       |     |         |  |               |        |        |      |     |         |
|-------------|---------|---------|-------|-----|---------|--|---------------|--------|--------|------|-----|---------|
| TGM1        | 0.67    | 0.45    | -0.59 | 1.5 | 7.3E-03 |  | KIFC1         | 2.95   | 4.51   | 0.62 | 1.5 | 5.0E-05 |
| FA2H        | 1.95    | 1.30    | -0.58 | 1.5 | 5.0E-05 |  | CSRP2         | 6.31   | 9.67   | 0.61 | 1.5 | 5.0E-05 |
| DAB1        | 2.37    | 1.58    | -0.58 | 1.5 | 5.0E-05 |  | BUB1B,PAK6    | 3.66   | 5.61   | 0.61 | 1.5 | 5.0E-05 |
| TNFRSF14    | 5.00    | 3.34    | -0.58 | 1.5 | 1.5E-03 |  | HAUS7         | 1.81   | 2.77   | 0.61 | 1.5 | 9.0E-04 |
| EPGN        | 0.92    | 0.61    | -0.58 | 1.5 | 1.7E-03 |  | ZNF415        | 0.95   | 1.45   | 0.61 | 1.5 | 2.0E-04 |
| CSF3        | 37.92   | 25.37   | -0.58 | 1.5 | 5.0E-05 |  | RECK          | 3.11   | 4.76   | 0.61 | 1.5 | 5.0E-05 |
| INPP5J      | 1.24    | 0.83    | -0.58 | 1.5 | 1.9E-03 |  | S100A8        | 12.62  | 19.29  | 0.61 | 1.5 | 5.0E-05 |
| SAMD9       | 10.94   | 7.33    | -0.58 | 1.5 | 5.0E-05 |  | EMP2          | 1.67   | 2.54   | 0.61 | 1.5 | 5.0E-05 |
| CYP2S1      | 0.84    | 0.56    | -0.58 | 1.5 | 3.7E-03 |  | ZNF468        | 3.29   | 5.01   | 0.61 | 1.5 | 5.0E-05 |
| ZNF114      | 2.57    | 1.72    | -0.58 | 1.5 | 5.0E-05 |  | ZNF844        | 0.62   | 0.94   | 0.61 | 1.5 | 7.0E-04 |
| PTRH1       | 11.35   | 7.62    | -0.58 | 1.5 | 1.4E-03 |  | SCD5          | 10.92  | 16.64  | 0.61 | 1.5 | 5.0E-05 |
| PMS2P5      | 4.51    | 3.03    | -0.57 | 1.5 | 5.0E-05 |  | TROAP         | 3.65   | 5.56   | 0.61 | 1.5 | 4.0E-04 |
| DHX8        | 13.38   | 8.99    | -0.57 | 1.5 | 5.0E-05 |  | ALOX5AP       | 16.98  | 25.86  | 0.61 | 1.5 | 5.0E-05 |
| ABCA7       | 5.82    | 3.91    | -0.57 | 1.5 | 5.0E-05 |  | FAM102B       | 0.60   | 0.92   | 0.61 | 1.5 | 5.0E-05 |
| HSPA5       | 1417.19 | 952.70  | -0.57 | 1.5 | 5.0E-05 |  | EIF3F         | 108.66 | 165.34 | 0.61 | 1.5 | 5.0E-05 |
| RNF213      | 69.99   | 47.12   | -0.57 | 1.5 | 5.0E-05 |  | TGFBR1        | 13.66  | 20.77  | 0.61 | 1.5 | 5.0E-05 |
| GENE        | 26.31   | 17.71   | -0.57 | 1.5 | 5.0E-05 |  | C15orf57      | 5.42   | 8.24   | 0.60 | 1.5 | 5.0E-05 |
| IFITM1      | 1976.10 | 1330.76 | -0.57 | 1.5 | 5.0E-05 |  | NDUFS2        | 37.29  | 56.71  | 0.60 | 1.5 | 5.0E-05 |
| SH3TC2      | 0.41    | 0.27    | -0.57 | 1.5 | 5.0E-05 |  | ZNF429        | 1.50   | 2.28   | 0.60 | 1.5 | 5.0E-05 |
| TIMP2       | 86.29   | 58.15   | -0.57 | 1.5 | 5.0E-05 |  | RBM24         | 2.07   | 3.15   | 0.60 | 1.5 | 5.0E-05 |
| TMEM45A     | 2.59    | 1.74    | -0.57 | 1.5 | 1.0E-04 |  | CDC6          | 4.01   | 6.10   | 0.60 | 1.5 | 5.0E-05 |
| DDTL        | 1.47    | 0.99    | -0.57 | 1.5 | 1.0E-02 |  | FOXP4         | 4.60   | 6.99   | 0.60 | 1.5 | 5.0E-05 |
| MGC72080    | 10.45   | 7.04    | -0.57 | 1.5 | 5.0E-05 |  | PODN          | 0.74   | 1.12   | 0.60 | 1.5 | 1.5E-04 |
| KCNS1       | 2.76    | 1.86    | -0.57 | 1.5 | 5.0E-05 |  | STK38         | 12.53  | 19.01  | 0.60 | 1.5 | 5.0E-05 |
| IL4I1,NUP62 | 49.53   | 33.41   | -0.57 | 1.5 | 5.0E-05 |  | C1orf21       | 0.29   | 0.44   | 0.60 | 1.5 | 5.0E-05 |
| KCNC4       | 2.15    | 1.45    | -0.57 | 1.5 | 5.0E-05 |  | SBSPON        | 11.91  | 18.05  | 0.60 | 1.5 | 5.0E-05 |
| EGFL7       | 9.64    | 6.51    | -0.57 | 1.5 | 5.0E-05 |  | LTB           | 1.90   | 2.88   | 0.60 | 1.5 | 8.8E-03 |
| RORA        | 9.05    | 6.11    | -0.57 | 1.5 | 5.0E-05 |  | FZD7          | 2.01   | 3.05   | 0.60 | 1.5 | 5.0E-05 |
| RRAD        | 48.27   | 32.60   | -0.57 | 1.5 | 5.0E-05 |  | CACNA2D3      | 0.69   | 1.04   | 0.60 | 1.5 | 1.1E-02 |
| LDHD        | 1.15    | 0.78    | -0.57 | 1.5 | 5.3E-03 |  | LOC100129961  | 1.01   | 1.53   | 0.60 | 1.5 | 2.5E-03 |
| ABCE1       | 27.31   | 18.45   | -0.57 | 1.5 | 5.0E-05 |  | KIF4A         | 1.87   | 2.82   | 0.60 | 1.5 | 5.0E-05 |
| PRSS8       | 84.68   | 57.31   | -0.56 | 1.5 | 5.0E-05 |  | ZNF596        | 1.27   | 1.93   | 0.60 | 1.5 | 7.3E-03 |
| MIER2       | 5.25    | 3.55    | -0.56 | 1.5 | 5.0E-05 |  | HKR1          | 5.34   | 8.08   | 0.60 | 1.5 | 5.0E-05 |
| AQP1        | 27.81   | 18.82   | -0.56 | 1.5 | 5.0E-05 |  | TRAIIP        | 1.01   | 1.53   | 0.60 | 1.5 | 5.5E-04 |
| EPHA4       | 3.91    | 2.65    | -0.56 | 1.5 | 5.0E-05 |  | BLM           | 0.51   | 0.78   | 0.60 | 1.5 | 1.0E-04 |
| SAMD5       | 20.72   | 14.05   | -0.56 | 1.5 | 5.0E-05 |  | IMPA2         | 17.17  | 25.98  | 0.60 | 1.5 | 5.0E-05 |
| BET1        | 18.38   | 12.47   | -0.56 | 1.5 | 5.0E-05 |  | PROS1         | 8.96   | 13.55  | 0.60 | 1.5 | 5.0E-05 |
| SLAIN2      | 11.13   | 7.55    | -0.56 | 1.5 | 5.0E-05 |  | ZNF595,ZNF718 | 2.07   | 3.14   | 0.60 | 1.5 | 5.0E-05 |

|          |        |        |       |     |         |  |          |       |       |      |     |         |
|----------|--------|--------|-------|-----|---------|--|----------|-------|-------|------|-----|---------|
| TCF4     | 0.88   | 0.60   | -0.56 | 1.5 | 5.0E-05 |  | RARRES1  | 20.58 | 31.12 | 0.60 | 1.5 | 5.0E-05 |
| LGALS3BP | 415.59 | 282.30 | -0.56 | 1.5 | 5.0E-05 |  | PHF7     | 1.65  | 2.50  | 0.60 | 1.5 | 3.0E-04 |
| PSPC1    | 27.89  | 18.95  | -0.56 | 1.5 | 2.5E-04 |  | ASAP3    | 1.50  | 2.27  | 0.60 | 1.5 | 5.0E-05 |
| KCNJ15   | 48.18  | 32.74  | -0.56 | 1.5 | 5.0E-05 |  | SNED1    | 0.55  | 0.84  | 0.60 | 1.5 | 8.6E-03 |
| PSTPIP2  | 15.37  | 10.46  | -0.56 | 1.5 | 5.0E-05 |  | GABPB2   | 1.56  | 2.36  | 0.59 | 1.5 | 5.0E-05 |
| GPD1     | 3.54   | 2.41   | -0.56 | 1.5 | 5.0E-05 |  | CENPE    | 1.52  | 2.30  | 0.59 | 1.5 | 5.0E-05 |
| XAF1     | 27.27  | 18.55  | -0.56 | 1.5 | 5.0E-05 |  | ZNF600   | 2.64  | 3.99  | 0.59 | 1.5 | 5.0E-05 |
| HLA-J    | 1.65   | 1.12   | -0.56 | 1.5 | 7.9E-03 |  | FAM101B  | 2.01  | 3.04  | 0.59 | 1.5 | 5.0E-05 |
| THEMIS2  | 34.66  | 23.59  | -0.55 | 1.5 | 5.0E-05 |  | CDC20    | 16.41 | 24.71 | 0.59 | 1.5 | 5.0E-05 |
| PARP8    | 11.50  | 7.83   | -0.55 | 1.5 | 5.0E-05 |  | HMMR     | 2.68  | 4.03  | 0.59 | 1.5 | 5.0E-05 |
| SLC52A3  | 2.71   | 1.85   | -0.55 | 1.5 | 5.0E-05 |  | SELL     | 2.09  | 3.14  | 0.59 | 1.5 | 5.0E-05 |
| SSH1     | 12.30  | 8.38   | -0.55 | 1.5 | 5.0E-05 |  | FRY      | 0.42  | 0.63  | 0.59 | 1.5 | 5.0E-05 |
| PRRX2    | 4.34   | 2.96   | -0.55 | 1.5 | 1.0E-03 |  | POLR2D   | 6.82  | 10.24 | 0.59 | 1.5 | 5.0E-05 |
| PIM2     | 9.46   | 6.45   | -0.55 | 1.5 | 5.0E-05 |  | CDCA2    | 1.57  | 2.35  | 0.59 | 1.5 | 5.0E-05 |
| SSTR1    | 2.33   | 1.59   | -0.55 | 1.5 | 5.0E-05 |  | TMEM37   | 0.75  | 1.13  | 0.59 | 1.5 | 6.8E-03 |
| ANKRD46  | 5.71   | 3.90   | -0.55 | 1.5 | 5.0E-05 |  | ZNF254   | 4.42  | 6.63  | 0.58 | 1.5 | 5.0E-05 |
| TTLL7    | 1.90   | 1.30   | -0.55 | 1.5 | 5.0E-05 |  | KALRN    | 0.77  | 1.16  | 0.58 | 1.5 | 5.0E-05 |
| SMCHD1   | 9.00   | 6.15   | -0.55 | 1.5 | 5.0E-05 |  | CDS2     | 8.20  | 12.28 | 0.58 | 1.5 | 5.0E-05 |
| C2orf47  | 14.75  | 10.10  | -0.55 | 1.5 | 5.0E-05 |  | C11orf92 | 0.36  | 0.54  | 0.58 | 1.5 | 1.7E-03 |
| RASD1    | 14.18  | 9.72   | -0.55 | 1.5 | 5.0E-05 |  | GTF3A    | 37.93 | 56.78 | 0.58 | 1.5 | 5.0E-05 |
| SRSF12   | 2.47   | 1.69   | -0.54 | 1.5 | 5.0E-05 |  | KIAA1161 | 0.97  | 1.45  | 0.58 | 1.5 | 5.0E-05 |
| NR3C2    | 1.17   | 0.80   | -0.54 | 1.5 | 5.0E-05 |  | RNASEH2A | 6.81  | 10.19 | 0.58 | 1.5 | 5.0E-05 |
| TDG      | 15.61  | 10.71  | -0.54 | 1.5 | 5.0E-05 |  | SKA1     | 1.67  | 2.50  | 0.58 | 1.5 | 5.0E-05 |
| TAC1     | 3.75   | 2.57   | -0.54 | 1.5 | 2.5E-04 |  | SH3RF2   | 3.47  | 5.19  | 0.58 | 1.5 | 5.0E-05 |
| MED21    | 7.81   | 5.36   | -0.54 | 1.5 | 5.0E-05 |  | TCF19    | 3.04  | 4.54  | 0.58 | 1.5 | 5.0E-05 |
| NAT14    | 23.78  | 16.34  | -0.54 | 1.5 | 5.0E-05 |  | ZNF83    | 17.34 | 25.88 | 0.58 | 1.5 | 5.0E-05 |
| NAPSB    | 4.76   | 3.27   | -0.54 | 1.5 | 5.0E-05 |  | FAM83D   | 4.41  | 6.58  | 0.58 | 1.5 | 5.0E-05 |
| LYSMD2   | 10.20  | 7.01   | -0.54 | 1.5 | 5.0E-05 |  | PKMYT1   | 1.35  | 2.01  | 0.58 | 1.5 | 1.1E-02 |
| CDKAL1   | 18.65  | 12.82  | -0.54 | 1.5 | 5.0E-05 |  | ZNF204P  | 0.90  | 1.34  | 0.58 | 1.5 | 5.0E-05 |
| ZNF169   | 0.98   | 0.67   | -0.54 | 1.5 | 1.0E-04 |  | TACC3    | 8.81  | 13.14 | 0.58 | 1.5 | 5.0E-05 |
| YOD1     | 8.88   | 6.11   | -0.54 | 1.5 | 5.0E-05 |  | ZW10     | 4.70  | 7.00  | 0.57 | 1.5 | 5.0E-05 |
| TMEM62   | 25.20  | 17.36  | -0.54 | 1.5 | 5.0E-05 |  | CCNA2    | 5.14  | 7.65  | 0.57 | 1.5 | 5.0E-05 |
| SLC26A11 | 10.08  | 6.95   | -0.54 | 1.5 | 5.0E-05 |  | OSBPL5   | 2.70  | 4.02  | 0.57 | 1.5 | 5.0E-05 |
| RAB3IL1  | 1.33   | 0.92   | -0.54 | 1.4 | 2.4E-03 |  | LBH      | 6.90  | 10.26 | 0.57 | 1.5 | 5.0E-05 |
| VWCE     | 4.37   | 3.02   | -0.54 | 1.4 | 5.0E-05 |  | ANKRD34B | 10.15 | 15.09 | 0.57 | 1.5 | 5.0E-05 |
| DICER1   | 17.55  | 12.11  | -0.53 | 1.4 | 5.0E-05 |  | NUF2     | 2.49  | 3.70  | 0.57 | 1.5 | 5.0E-05 |
| ZMYND15  | 1.81   | 1.25   | -0.53 | 1.4 | 5.0E-05 |  | C22orf46 | 2.21  | 3.28  | 0.57 | 1.5 | 5.0E-05 |
| DDX52    | 23.93  | 16.53  | -0.53 | 1.4 | 5.0E-05 |  | KIAA0101 | 4.30  | 6.39  | 0.57 | 1.5 | 5.0E-05 |

|           |        |        |       |     |         |  |              |        |         |      |     |         |
|-----------|--------|--------|-------|-----|---------|--|--------------|--------|---------|------|-----|---------|
| SLCO2B1   | 49.45  | 34.16  | -0.53 | 1.4 | 5.0E-05 |  | CTNNBIP1     | 5.67   | 8.42    | 0.57 | 1.5 | 5.0E-05 |
| RPH3AL    | 4.62   | 3.19   | -0.53 | 1.4 | 5.0E-05 |  | CYP1B1       | 8.19   | 12.15   | 0.57 | 1.5 | 5.0E-05 |
| CNTNAP1   | 0.92   | 0.64   | -0.53 | 1.4 | 7.0E-03 |  | RAI2         | 0.67   | 0.99    | 0.57 | 1.5 | 5.2E-03 |
| ADAM1A    | 1.54   | 1.06   | -0.53 | 1.4 | 2.0E-04 |  | RACGAP1      | 6.20   | 9.19    | 0.57 | 1.5 | 5.0E-05 |
| C19orf25  | 6.00   | 4.15   | -0.53 | 1.4 | 8.5E-04 |  | SOD2         | 848.09 | 1255.67 | 0.57 | 1.5 | 5.0E-05 |
| NDRG1     | 83.00  | 57.40  | -0.53 | 1.4 | 5.0E-05 |  | TMEM44-AS1   | 1.99   | 2.95    | 0.57 | 1.5 | 5.0E-04 |
| DDX58     | 65.58  | 45.44  | -0.53 | 1.4 | 5.0E-05 |  | BTBD11       | 0.92   | 1.36    | 0.57 | 1.5 | 5.0E-05 |
| SSFA2     | 23.32  | 16.16  | -0.53 | 1.4 | 5.0E-05 |  | PRMT6        | 9.05   | 13.39   | 0.56 | 1.5 | 5.0E-05 |
| HIST1H2AC | 4.56   | 3.16   | -0.53 | 1.4 | 5.0E-05 |  | ZNF404       | 0.66   | 0.97    | 0.56 | 1.5 | 8.7E-03 |
| MIR3916   | 13.84  | 9.60   | -0.53 | 1.4 | 5.0E-05 |  | ZBED2        | 32.87  | 48.55   | 0.56 | 1.5 | 5.0E-05 |
| FGB       | 49.26  | 34.16  | -0.53 | 1.4 | 5.0E-05 |  | RAD23A       | 24.54  | 36.22   | 0.56 | 1.5 | 5.0E-05 |
| KLK10     | 2.75   | 1.91   | -0.53 | 1.4 | 5.0E-05 |  | C1orf168     | 0.40   | 0.60    | 0.56 | 1.5 | 3.3E-03 |
| GBP4      | 5.14   | 3.57   | -0.53 | 1.4 | 5.0E-05 |  | SLC6A14      | 12.36  | 18.24   | 0.56 | 1.5 | 5.0E-05 |
| MXRA8     | 12.00  | 8.33   | -0.53 | 1.4 | 5.0E-05 |  | LOC100127983 | 3.58   | 5.29    | 0.56 | 1.5 | 1.5E-04 |
| EFCAB2    | 8.27   | 5.74   | -0.53 | 1.4 | 5.0E-05 |  | ZNF267       | 2.52   | 3.72    | 0.56 | 1.5 | 5.0E-05 |
| RRN3      | 9.90   | 6.87   | -0.53 | 1.4 | 5.0E-05 |  | ARHGEF9      | 2.25   | 3.32    | 0.56 | 1.5 | 5.0E-05 |
| TGS1      | 11.41  | 7.93   | -0.53 | 1.4 | 5.0E-05 |  | NEXN         | 1.50   | 2.21    | 0.56 | 1.5 | 5.0E-05 |
| WDFY1     | 35.05  | 24.36  | -0.53 | 1.4 | 5.0E-05 |  | EDN1         | 23.73  | 34.99   | 0.56 | 1.5 | 5.0E-05 |
| IL1R1     | 67.56  | 46.96  | -0.52 | 1.4 | 5.0E-05 |  | ZNF813       | 1.01   | 1.48    | 0.56 | 1.5 | 5.0E-05 |
| TRANK1    | 9.38   | 6.52   | -0.52 | 1.4 | 5.0E-05 |  | MARCH1       | 3.68   | 5.42    | 0.56 | 1.5 | 5.0E-05 |
| MTSS1     | 19.21  | 13.37  | -0.52 | 1.4 | 5.0E-05 |  | APBA2        | 1.36   | 1.99    | 0.56 | 1.5 | 5.0E-05 |
| ZFP36L2   | 36.92  | 25.72  | -0.52 | 1.4 | 5.0E-05 |  | ZNF765       | 1.83   | 2.69    | 0.56 | 1.5 | 5.0E-05 |
| LOC643201 | 0.82   | 0.57   | -0.52 | 1.4 | 4.5E-04 |  | ZNF708       | 1.78   | 2.63    | 0.56 | 1.5 | 5.0E-05 |
| GNPTAB    | 12.76  | 8.89   | -0.52 | 1.4 | 5.0E-05 |  | ZNF845       | 1.37   | 2.01    | 0.56 | 1.5 | 5.0E-05 |
| SLC30A7   | 16.05  | 11.20  | -0.52 | 1.4 | 5.0E-05 |  | PAIP2B       | 0.50   | 0.74    | 0.56 | 1.5 | 5.0E-05 |
| EXTL2     | 8.29   | 5.79   | -0.52 | 1.4 | 5.0E-05 |  | TM4SF18      | 8.84   | 13.00   | 0.56 | 1.5 | 5.0E-05 |
| TLN2      | 8.00   | 5.58   | -0.52 | 1.4 | 4.4E-03 |  | AKAP6        | 0.31   | 0.46    | 0.56 | 1.5 | 5.0E-05 |
| FILIP1    | 0.54   | 0.38   | -0.52 | 1.4 | 2.9E-03 |  | ZNF567       | 1.66   | 2.43    | 0.55 | 1.5 | 5.0E-05 |
| MCOLN1    | 9.98   | 6.97   | -0.52 | 1.4 | 5.0E-05 |  | CTNNAL1      | 53.86  | 79.10   | 0.55 | 1.5 | 5.0E-05 |
| MX1       | 387.53 | 270.76 | -0.52 | 1.4 | 5.0E-05 |  | IQGAP3       | 2.41   | 3.53    | 0.55 | 1.5 | 5.0E-05 |
| KRT81     | 8.73   | 6.10   | -0.52 | 1.4 | 5.0E-05 |  | KIAA1551     | 10.27  | 15.06   | 0.55 | 1.5 | 5.0E-05 |
| TSPAN18   | 9.85   | 6.89   | -0.52 | 1.4 | 5.0E-05 |  | LPCAT1       | 22.80  | 33.43   | 0.55 | 1.5 | 5.0E-05 |
| AMDHD2    | 9.35   | 6.54   | -0.52 | 1.4 | 5.0E-05 |  | FOXP2        | 0.95   | 1.39    | 0.55 | 1.5 | 5.0E-05 |
| MARK3     | 34.43  | 24.09  | -0.52 | 1.4 | 5.0E-05 |  | FAM86B3P     | 2.79   | 4.09    | 0.55 | 1.5 | 5.0E-05 |
| FAM46A    | 5.33   | 3.73   | -0.52 | 1.4 | 5.0E-05 |  | LOC81691     | 1.11   | 1.62    | 0.55 | 1.5 | 2.6E-03 |
| HACE1     | 2.70   | 1.89   | -0.52 | 1.4 | 5.0E-05 |  | ZNF585B      | 1.48   | 2.17    | 0.55 | 1.5 | 5.0E-05 |
| ST3GAL2   | 7.86   | 5.50   | -0.51 | 1.4 | 5.0E-05 |  | PPDPF        | 93.24  | 136.37  | 0.55 | 1.5 | 5.0E-05 |
| POMP      | 89.14  | 62.48  | -0.51 | 1.4 | 5.0E-05 |  | GLE1         | 7.17   | 10.48   | 0.55 | 1.5 | 5.0E-05 |

|                 |        |        |       |     |         |  |           |        |        |      |     |         |
|-----------------|--------|--------|-------|-----|---------|--|-----------|--------|--------|------|-----|---------|
| SCO2,TYMP       | 79.81  | 55.96  | -0.51 | 1.4 | 5.0E-05 |  | NKD2      | 3.36   | 4.91   | 0.55 | 1.5 | 5.0E-05 |
| APOL3           | 3.69   | 2.59   | -0.51 | 1.4 | 5.0E-05 |  | RGS19     | 4.37   | 6.39   | 0.55 | 1.5 | 5.0E-05 |
| LMBRD2          | 4.37   | 3.06   | -0.51 | 1.4 | 5.0E-05 |  | ZNF107    | 1.48   | 2.17   | 0.55 | 1.5 | 5.0E-05 |
| CDKN1A          | 114.83 | 80.59  | -0.51 | 1.4 | 5.0E-05 |  | MDK       | 98.40  | 143.64 | 0.55 | 1.5 | 5.0E-05 |
| ABCC10          | 5.67   | 3.98   | -0.51 | 1.4 | 5.0E-05 |  | WDR76     | 0.88   | 1.28   | 0.55 | 1.5 | 5.0E-05 |
| CSGALNACT1      | 44.45  | 31.26  | -0.51 | 1.4 | 5.0E-05 |  | INCENP    | 3.13   | 4.57   | 0.55 | 1.5 | 5.0E-05 |
| BTN3A3          | 5.75   | 4.05   | -0.51 | 1.4 | 5.0E-05 |  | NAV3      | 2.12   | 3.09   | 0.55 | 1.5 | 5.0E-05 |
| NOD1            | 2.85   | 2.00   | -0.51 | 1.4 | 5.0E-05 |  | CDK1      | 8.13   | 11.86  | 0.54 | 1.5 | 5.0E-05 |
| UBFD1           | 21.54  | 15.16  | -0.51 | 1.4 | 5.0E-05 |  | SNORD60   | 10.34  | 15.07  | 0.54 | 1.5 | 3.5E-04 |
| TSLP            | 0.88   | 0.62   | -0.51 | 1.4 | 6.9E-03 |  | DEFB1     | 51.13  | 74.54  | 0.54 | 1.5 | 5.0E-05 |
| NMI             | 40.91  | 28.82  | -0.51 | 1.4 | 5.0E-05 |  | BEAN1     | 0.93   | 1.36   | 0.54 | 1.5 | 7.1E-03 |
| HLA-E           | 171.69 | 121.02 | -0.50 | 1.4 | 5.0E-05 |  | DCDC2     | 57.15  | 83.28  | 0.54 | 1.5 | 5.0E-05 |
| HIST1H2BK       | 23.21  | 16.36  | -0.50 | 1.4 | 5.0E-05 |  | ERLIN2    | 20.17  | 29.39  | 0.54 | 1.5 | 5.0E-05 |
| ATG2A           | 9.05   | 6.38   | -0.50 | 1.4 | 5.0E-05 |  | AQP9      | 17.88  | 26.04  | 0.54 | 1.5 | 5.0E-05 |
| PNPLA6          | 18.42  | 12.99  | -0.50 | 1.4 | 5.0E-05 |  | TMEM194B  | 1.21   | 1.77   | 0.54 | 1.5 | 1.5E-04 |
| VMAC            | 1.96   | 1.39   | -0.50 | 1.4 | 2.3E-03 |  | TMEM194A  | 2.92   | 4.24   | 0.54 | 1.5 | 5.0E-05 |
| CDCA4           | 5.33   | 3.76   | -0.50 | 1.4 | 5.0E-05 |  | ASF1B     | 2.86   | 4.16   | 0.54 | 1.5 | 5.0E-05 |
| HES4            | 11.34  | 8.01   | -0.50 | 1.4 | 5.0E-05 |  | LOC729013 | 1.96   | 2.86   | 0.54 | 1.5 | 1.6E-03 |
| GTF2IRD1P1      | 6.71   | 4.74   | -0.50 | 1.4 | 1.3E-03 |  | APH1B     | 5.08   | 7.39   | 0.54 | 1.5 | 5.0E-05 |
| TSC22D3         | 51.83  | 36.63  | -0.50 | 1.4 | 5.0E-05 |  | ASS1      | 44.51  | 64.76  | 0.54 | 1.5 | 5.0E-05 |
| TMEM30B         | 6.84   | 4.84   | -0.50 | 1.4 | 5.0E-05 |  | CPM       | 38.17  | 55.52  | 0.54 | 1.5 | 1.0E-04 |
| SP110           | 29.27  | 20.70  | -0.50 | 1.4 | 5.0E-05 |  | NPY1R     | 0.97   | 1.41   | 0.54 | 1.5 | 1.5E-04 |
| HLA-A,LOC554223 | 676.01 | 478.20 | -0.50 | 1.4 | 5.0E-05 |  | TGFBR2    | 106.50 | 154.84 | 0.54 | 1.5 | 5.0E-05 |
| TMEM14C         | 77.54  | 54.85  | -0.50 | 1.4 | 5.0E-05 |  | PTPLA     | 5.13   | 7.46   | 0.54 | 1.5 | 5.0E-05 |
| FAM3B           | 2.55   | 1.80   | -0.50 | 1.4 | 2.0E-03 |  | PHYHIP    | 0.41   | 0.60   | 0.54 | 1.5 | 1.2E-02 |
| LIPT2           | 1.84   | 1.30   | -0.50 | 1.4 | 6.4E-03 |  | EXTL3     | 12.88  | 18.71  | 0.54 | 1.5 | 5.0E-05 |
| SRRM2           | 81.71  | 57.83  | -0.50 | 1.4 | 5.0E-05 |  | RAG1      | 0.48   | 0.70   | 0.54 | 1.5 | 5.0E-05 |
| MRPL34          | 25.46  | 18.03  | -0.50 | 1.4 | 5.0E-05 |  | CCDC159   | 1.67   | 2.43   | 0.54 | 1.5 | 7.7E-03 |
| C4orf33         | 6.47   | 4.59   | -0.50 | 1.4 | 2.0E-03 |  | CYR61     | 227.10 | 329.34 | 0.54 | 1.5 | 5.0E-05 |
| CD274           | 5.73   | 4.06   | -0.50 | 1.4 | 5.0E-05 |  | PNMA2     | 0.70   | 1.01   | 0.54 | 1.5 | 5.0E-05 |
| PER1            | 22.20  | 15.73  | -0.50 | 1.4 | 5.0E-05 |  | TOMM22    | 28.26  | 40.97  | 0.54 | 1.4 | 5.0E-05 |
| SLC25A22        | 13.47  | 9.56   | -0.50 | 1.4 | 5.0E-05 |  | FKBP5     | 29.06  | 42.13  | 0.54 | 1.4 | 5.0E-05 |
| BTN3A2          | 9.36   | 6.64   | -0.50 | 1.4 | 5.0E-05 |  | DAPK2     | 0.64   | 0.93   | 0.53 | 1.4 | 4.5E-03 |
| RIMKLB          | 65.62  | 46.56  | -0.49 | 1.4 | 1.5E-04 |  | F2R       | 5.53   | 8.01   | 0.53 | 1.4 | 5.0E-05 |
| CGNL1           | 5.89   | 4.18   | -0.49 | 1.4 | 5.0E-05 |  | HOXA3     | 2.09   | 3.02   | 0.53 | 1.4 | 1.5E-04 |
| RNF130          | 17.90  | 12.72  | -0.49 | 1.4 | 5.0E-05 |  | KLF10     | 4.56   | 6.59   | 0.53 | 1.4 | 5.0E-05 |
| CDYL2           | 3.83   | 2.73   | -0.49 | 1.4 | 5.0E-05 |  | TLR4      | 1.08   | 1.56   | 0.53 | 1.4 | 5.0E-05 |
| PDE5A           | 1.06   | 0.76   | -0.49 | 1.4 | 2.1E-03 |  | SDPR      | 1.55   | 2.25   | 0.53 | 1.4 | 5.0E-05 |



|                                                                                 |        |       |       |     |         |  |           |       |       |      |     |         |
|---------------------------------------------------------------------------------|--------|-------|-------|-----|---------|--|-----------|-------|-------|------|-----|---------|
| PARP9                                                                           | 74.58  | 53.16 | -0.49 | 1.4 | 3.5E-04 |  | VANGL1    | 5.15  | 7.44  | 0.53 | 1.4 | 5.0E-05 |
| CAMK2D                                                                          | 12.03  | 8.58  | -0.49 | 1.4 | 5.0E-05 |  | NDC80     | 2.74  | 3.96  | 0.53 | 1.4 | 5.0E-05 |
| TCN2                                                                            | 32.14  | 22.92 | -0.49 | 1.4 | 5.0E-05 |  | CA3       | 0.98  | 1.42  | 0.53 | 1.4 | 3.8E-03 |
| HES1                                                                            | 23.70  | 16.91 | -0.49 | 1.4 | 5.0E-05 |  | YBEY      | 8.07  | 11.67 | 0.53 | 1.4 | 5.0E-05 |
| IL23A                                                                           | 4.54   | 3.24  | -0.49 | 1.4 | 1.7E-03 |  | MCM7      | 14.62 | 21.14 | 0.53 | 1.4 | 1.2E-03 |
| SLC16A6                                                                         | 3.31   | 2.36  | -0.49 | 1.4 | 5.0E-05 |  | TGFB2     | 8.87  | 12.82 | 0.53 | 1.4 | 5.0E-05 |
| SYTL1                                                                           | 11.31  | 8.07  | -0.49 | 1.4 | 5.0E-05 |  | SLFN11    | 0.30  | 0.43  | 0.53 | 1.4 | 4.6E-03 |
| UGT1A1,UGT1A10,<br>UGT1A3,UGT1A4,U<br>GT1A5,UGT1A6,UG<br>T1A7,UGT1A8,UGT1<br>A9 | 38.99  | 27.82 | -0.49 | 1.4 | 5.0E-05 |  | PDSS2     | 4.66  | 6.73  | 0.53 | 1.4 | 3.5E-04 |
| MRPL18                                                                          | 49.32  | 35.22 | -0.49 | 1.4 | 5.0E-05 |  | ZNF766    | 3.20  | 4.62  | 0.53 | 1.4 | 5.0E-05 |
| NDUFA10                                                                         | 14.45  | 10.32 | -0.49 | 1.4 | 5.0E-05 |  | ADAMTS10  | 0.77  | 1.10  | 0.53 | 1.4 | 1.0E-04 |
| IMP3                                                                            | 21.26  | 15.18 | -0.49 | 1.4 | 5.0E-05 |  | KLF11     | 1.64  | 2.37  | 0.53 | 1.4 | 5.0E-05 |
| XRN1                                                                            | 9.29   | 6.64  | -0.48 | 1.4 | 5.0E-05 |  | SLC9A7    | 6.84  | 9.87  | 0.53 | 1.4 | 5.0E-05 |
| ABHD4                                                                           | 16.52  | 11.81 | -0.48 | 1.4 | 5.0E-05 |  | ORC1      | 1.09  | 1.57  | 0.53 | 1.4 | 5.0E-05 |
| KIFC2                                                                           | 4.28   | 3.06  | -0.48 | 1.4 | 5.0E-05 |  | MELK      | 7.48  | 10.78 | 0.53 | 1.4 | 5.0E-05 |
| ATP10D                                                                          | 47.77  | 34.15 | -0.48 | 1.4 | 5.0E-05 |  | ZNF629    | 7.21  | 10.39 | 0.53 | 1.4 | 5.0E-05 |
| HCFC1R1                                                                         | 18.94  | 13.55 | -0.48 | 1.4 | 5.0E-05 |  | TRAF1     | 0.45  | 0.64  | 0.53 | 1.4 | 2.6E-03 |
| STK39                                                                           | 36.66  | 26.24 | -0.48 | 1.4 | 5.0E-05 |  | CCDC150   | 0.76  | 1.09  | 0.53 | 1.4 | 5.0E-05 |
| CYB5B                                                                           | 17.77  | 12.74 | -0.48 | 1.4 | 5.0E-05 |  | SCN9A     | 0.31  | 0.45  | 0.52 | 1.4 | 5.0E-05 |
| PTPN6                                                                           | 9.81   | 7.03  | -0.48 | 1.4 | 5.0E-05 |  | ZNF551    | 1.45  | 2.09  | 0.52 | 1.4 | 5.0E-05 |
| SIRPB1                                                                          | 14.09  | 10.10 | -0.48 | 1.4 | 5.0E-05 |  | ZNF506    | 4.23  | 6.09  | 0.52 | 1.4 | 1.3E-03 |
| ABCB6                                                                           | 7.06   | 5.06  | -0.48 | 1.4 | 5.0E-05 |  | VPS25     | 62.37 | 89.65 | 0.52 | 1.4 | 5.0E-05 |
| CSF2                                                                            | 4.00   | 2.87  | -0.48 | 1.4 | 8.2E-03 |  | ARHGAP11A | 3.15  | 4.53  | 0.52 | 1.4 | 5.0E-05 |
| USP38                                                                           | 10.66  | 7.65  | -0.48 | 1.4 | 5.0E-05 |  | ZNF268    | 3.75  | 5.40  | 0.52 | 1.4 | 5.0E-05 |
| PAPL                                                                            | 0.91   | 0.66  | -0.48 | 1.4 | 6.4E-03 |  | MAMDC2    | 1.09  | 1.56  | 0.52 | 1.4 | 2.0E-04 |
| RORC                                                                            | 4.41   | 3.16  | -0.48 | 1.4 | 5.0E-05 |  | MIR135A2  | 2.40  | 3.45  | 0.52 | 1.4 | 1.3E-03 |
| ATP10A                                                                          | 8.43   | 6.05  | -0.48 | 1.4 | 5.0E-05 |  | TCF7L1    | 4.69  | 6.73  | 0.52 | 1.4 | 5.0E-05 |
| EBI3                                                                            | 3.49   | 2.51  | -0.48 | 1.4 | 3.4E-03 |  | ZIK1      | 1.91  | 2.75  | 0.52 | 1.4 | 5.0E-05 |
| AGPAT5                                                                          | 12.27  | 8.81  | -0.48 | 1.4 | 5.0E-05 |  | SLC30A2   | 1.22  | 1.74  | 0.52 | 1.4 | 4.0E-04 |
| PLA1A                                                                           | 6.80   | 4.89  | -0.48 | 1.4 | 5.0E-05 |  | LINC00617 | 9.58  | 13.74 | 0.52 | 1.4 | 5.0E-05 |
| MOV10                                                                           | 36.47  | 26.21 | -0.48 | 1.4 | 1.9E-03 |  | ARSG      | 1.79  | 2.56  | 0.52 | 1.4 | 5.0E-05 |
| MID1IP1                                                                         | 15.89  | 11.42 | -0.48 | 1.4 | 5.0E-05 |  | RPL26L1   | 23.22 | 33.28 | 0.52 | 1.4 | 5.0E-05 |
| LIMCH1                                                                          | 134.42 | 92.92 | -0.48 | 1.4 | 5.0E-05 |  | FOXO1     | 4.94  | 7.08  | 0.52 | 1.4 | 1.2E-03 |
| MBTPS2                                                                          | 12.30  | 8.85  | -0.48 | 1.4 | 5.0E-05 |  | TUBA1C    | 51.88 | 74.30 | 0.52 | 1.4 | 5.0E-05 |
| GSTM4                                                                           | 14.28  | 10.27 | -0.48 | 1.4 | 5.0E-05 |  | ZNF737    | 0.87  | 1.25  | 0.52 | 1.4 | 5.0E-05 |

|              |        |        |       |     |         |  |           |       |       |      |     |         |
|--------------|--------|--------|-------|-----|---------|--|-----------|-------|-------|------|-----|---------|
| NCF2         | 3.31   | 2.38   | -0.47 | 1.4 | 5.0E-05 |  | GPSM2     | 4.14  | 5.93  | 0.52 | 1.4 | 4.8E-03 |
| C7orf43      | 11.11  | 7.99   | -0.47 | 1.4 | 5.0E-05 |  | KIAA1804  | 10.27 | 14.70 | 0.52 | 1.4 | 5.0E-05 |
| LY6E         | 581.57 | 418.76 | -0.47 | 1.4 | 5.0E-05 |  | MMP24     | 13.21 | 18.90 | 0.52 | 1.4 | 5.0E-05 |
| PRKCE        | 7.18   | 5.18   | -0.47 | 1.4 | 5.0E-05 |  | TFDP1     | 22.18 | 31.72 | 0.52 | 1.4 | 5.0E-05 |
| MIER3        | 11.26  | 8.12   | -0.47 | 1.4 | 5.0E-05 |  | LINC00263 | 2.84  | 4.06  | 0.52 | 1.4 | 1.1E-03 |
| ABCD1        | 4.85   | 3.50   | -0.47 | 1.4 | 5.0E-05 |  | ZCCHC24   | 2.71  | 3.88  | 0.52 | 1.4 | 5.0E-05 |
| UBAP2L       | 50.17  | 36.20  | -0.47 | 1.4 | 3.5E-04 |  | TNS3      | 15.10 | 21.57 | 0.51 | 1.4 | 5.0E-05 |
| GUCY1A3      | 2.44   | 1.76   | -0.47 | 1.4 | 1.3E-03 |  | MCM5      | 3.86  | 5.51  | 0.51 | 1.4 | 5.0E-05 |
| DCN          | 360.15 | 259.96 | -0.47 | 1.4 | 5.0E-05 |  | PTPRB     | 3.44  | 4.90  | 0.51 | 1.4 | 5.0E-05 |
| SNX25        | 9.36   | 6.76   | -0.47 | 1.4 | 5.0E-05 |  | RAMP1     | 2.45  | 3.49  | 0.51 | 1.4 | 7.5E-03 |
| SEC31A       | 60.02  | 43.36  | -0.47 | 1.4 | 5.0E-05 |  | FAM20C    | 5.79  | 8.26  | 0.51 | 1.4 | 5.0E-05 |
| CRABP2       | 10.17  | 7.35   | -0.47 | 1.4 | 5.0E-05 |  | FAM64A    | 3.25  | 4.63  | 0.51 | 1.4 | 5.0E-05 |
| DLGAP1       | 6.41   | 4.63   | -0.47 | 1.4 | 3.0E-04 |  | LRRIQ1    | 0.52  | 0.75  | 0.51 | 1.4 | 2.5E-04 |
| RAB20        | 12.16  | 8.79   | -0.47 | 1.4 | 5.0E-05 |  | CAV1      | 65.58 | 93.50 | 0.51 | 1.4 | 5.0E-05 |
| SLC26A6      | 9.63   | 6.96   | -0.47 | 1.4 | 5.0E-05 |  | MCM4      | 4.42  | 6.30  | 0.51 | 1.4 | 5.0E-05 |
| LOC729852    | 7.24   | 5.24   | -0.47 | 1.4 | 5.0E-05 |  | ZNF701    | 1.63  | 2.32  | 0.51 | 1.4 | 5.0E-05 |
| HLA-DOB,TAP2 | 50.61  | 36.64  | -0.47 | 1.4 | 5.0E-05 |  | CBX2      | 0.67  | 0.95  | 0.51 | 1.4 | 7.1E-03 |
| KSR1         | 13.21  | 9.57   | -0.47 | 1.4 | 5.0E-05 |  | ZNF221    | 0.92  | 1.31  | 0.51 | 1.4 | 9.5E-04 |
| ALDOC        | 7.02   | 5.09   | -0.46 | 1.4 | 5.0E-05 |  | C2CD2     | 4.89  | 6.95  | 0.51 | 1.4 | 5.0E-05 |
| HDX          | 1.53   | 1.11   | -0.46 | 1.4 | 5.0E-05 |  | CYB5RL    | 0.73  | 1.04  | 0.51 | 1.4 | 6.5E-04 |
| B3GNT7       | 17.47  | 12.66  | -0.46 | 1.4 | 5.0E-05 |  | DDX39A    | 24.50 | 34.81 | 0.51 | 1.4 | 5.0E-05 |
| SLC46A1      | 2.76   | 2.00   | -0.46 | 1.4 | 5.0E-05 |  | R3HCC1    | 10.82 | 15.35 | 0.51 | 1.4 | 5.0E-05 |
| SLC25A34     | 0.97   | 0.70   | -0.46 | 1.4 | 5.8E-03 |  | ZSCAN29   | 6.49  | 9.21  | 0.51 | 1.4 | 5.0E-05 |
| GDAP1        | 3.14   | 2.28   | -0.46 | 1.4 | 5.0E-05 |  | ITGB6     | 12.11 | 17.18 | 0.51 | 1.4 | 5.0E-05 |
| ANGPTL4      | 3.63   | 2.63   | -0.46 | 1.4 | 5.0E-05 |  | FAM195A   | 11.50 | 16.32 | 0.50 | 1.4 | 5.0E-05 |
| TMEM68       | 8.96   | 6.50   | -0.46 | 1.4 | 1.3E-03 |  | ERCC6L    | 0.51  | 0.73  | 0.50 | 1.4 | 3.9E-03 |
| WNK4         | 2.44   | 1.77   | -0.46 | 1.4 | 5.0E-05 |  | PDE1C     | 1.88  | 2.66  | 0.50 | 1.4 | 5.0E-05 |
| TMEM201      | 4.41   | 3.20   | -0.46 | 1.4 | 5.0E-05 |  | MOXD1     | 6.75  | 9.57  | 0.50 | 1.4 | 5.0E-05 |
| TMEM14B      | 64.51  | 46.82  | -0.46 | 1.4 | 5.0E-05 |  | SMAD9     | 0.94  | 1.33  | 0.50 | 1.4 | 5.0E-05 |
| RAC2         | 50.67  | 36.78  | -0.46 | 1.4 | 5.0E-05 |  | B4GALT1   | 61.62 | 87.31 | 0.50 | 1.4 | 5.0E-05 |
| NR1D1        | 5.66   | 4.11   | -0.46 | 1.4 | 1.5E-04 |  | TTC12     | 5.54  | 7.84  | 0.50 | 1.4 | 5.0E-05 |
| MYOF         | 141.42 | 102.79 | -0.46 | 1.4 | 5.0E-05 |  | CDH3      | 6.47  | 9.16  | 0.50 | 1.4 | 5.0E-05 |
| CX3CL1       | 34.20  | 24.86  | -0.46 | 1.4 | 5.0E-05 |  | MMP2      | 15.79 | 22.35 | 0.50 | 1.4 | 5.0E-05 |
| PLOD3        | 30.20  | 21.96  | -0.46 | 1.4 | 5.0E-05 |  | ZNF492    | 0.32  | 0.45  | 0.50 | 1.4 | 1.2E-02 |
| LEPREL2      | 3.27   | 2.37   | -0.46 | 1.4 | 1.5E-04 |  | CXADR     | 19.45 | 27.52 | 0.50 | 1.4 | 5.0E-05 |
| PPP2R5B      | 17.80  | 12.95  | -0.46 | 1.4 | 5.0E-05 |  | ZNF300P1  | 1.89  | 2.68  | 0.50 | 1.4 | 5.0E-05 |
| ATP2C1       | 53.40  | 38.85  | -0.46 | 1.4 | 5.0E-05 |  | PHF19     | 3.62  | 5.12  | 0.50 | 1.4 | 3.5E-04 |
| ARMCX1       | 6.69   | 4.87   | -0.46 | 1.4 | 5.0E-05 |  | SLC2A4    | 0.78  | 1.11  | 0.50 | 1.4 | 1.3E-03 |

|                         |        |        |       |     |         |          |        |        |      |     |         |
|-------------------------|--------|--------|-------|-----|---------|----------|--------|--------|------|-----|---------|
| ATP6V0E2                | 8.40   | 6.11   | -0.46 | 1.4 | 5.0E-05 | IL13RA1  | 15.24  | 21.54  | 0.50 | 1.4 | 5.0E-05 |
| DCBLD2                  | 173.65 | 126.46 | -0.46 | 1.4 | 5.0E-05 | KLF7     | 1.64   | 2.31   | 0.50 | 1.4 | 5.0E-05 |
| RHPN1                   | 6.02   | 4.38   | -0.46 | 1.4 | 5.0E-05 | TTK      | 2.51   | 3.54   | 0.50 | 1.4 | 5.0E-05 |
| APOBEC3G                | 2.86   | 2.08   | -0.46 | 1.4 | 3.0E-04 | THY1     | 2.10   | 2.97   | 0.50 | 1.4 | 5.0E-05 |
| MYO1D                   | 25.92  | 18.89  | -0.46 | 1.4 | 5.0E-05 | KCNQ3    | 0.89   | 1.26   | 0.50 | 1.4 | 5.0E-05 |
| PARP12                  | 42.95  | 31.31  | -0.46 | 1.4 | 5.0E-05 | RNF144A  | 2.36   | 3.33   | 0.50 | 1.4 | 5.0E-05 |
| SNPH                    | 11.48  | 8.37   | -0.46 | 1.4 | 5.0E-05 | NFATC1   | 2.07   | 2.92   | 0.50 | 1.4 | 5.0E-05 |
| RTEL1,TNFRSF6B          | 9.34   | 6.81   | -0.46 | 1.4 | 8.9E-03 | ZNF271   | 6.55   | 9.23   | 0.50 | 1.4 | 5.0E-05 |
| CAPZB                   | 103.91 | 75.79  | -0.46 | 1.4 | 5.0E-05 | TNC      | 88.39  | 124.51 | 0.49 | 1.4 | 5.0E-05 |
| RABGGTB                 | 33.00  | 24.08  | -0.45 | 1.4 | 5.0E-05 | CLIC5    | 1.44   | 2.03   | 0.49 | 1.4 | 5.0E-05 |
| EML2                    | 26.90  | 19.64  | -0.45 | 1.4 | 5.0E-05 | NCAPD2   | 9.11   | 12.83  | 0.49 | 1.4 | 5.0E-05 |
| MCM9                    | 2.22   | 1.62   | -0.45 | 1.4 | 7.5E-03 | NEK2     | 3.37   | 4.75   | 0.49 | 1.4 | 5.0E-05 |
| MMAA                    | 4.14   | 3.03   | -0.45 | 1.4 | 5.0E-05 | OBFC1    | 6.94   | 9.77   | 0.49 | 1.4 | 1.9E-03 |
| IFI30                   | 82.30  | 60.10  | -0.45 | 1.4 | 5.0E-05 | RNF182   | 0.69   | 0.97   | 0.49 | 1.4 | 1.6E-03 |
| C5orf22                 | 9.34   | 6.82   | -0.45 | 1.4 | 5.0E-05 | ZFYVE21  | 19.12  | 26.91  | 0.49 | 1.4 | 5.0E-05 |
| ANKRD39                 | 7.82   | 5.71   | -0.45 | 1.4 | 2.0E-04 | MEIS3    | 1.22   | 1.71   | 0.49 | 1.4 | 3.3E-03 |
| PCGF2                   | 19.26  | 14.07  | -0.45 | 1.4 | 5.0E-05 | MGEA5    | 18.37  | 25.85  | 0.49 | 1.4 | 5.0E-05 |
| GPX8                    | 17.62  | 12.87  | -0.45 | 1.4 | 5.0E-05 | RAB30    | 1.32   | 1.85   | 0.49 | 1.4 | 4.0E-03 |
| PAPSS1                  | 28.11  | 20.54  | -0.45 | 1.4 | 5.0E-05 | MFSD6    | 6.36   | 8.94   | 0.49 | 1.4 | 5.0E-05 |
| MITD1                   | 17.19  | 12.57  | -0.45 | 1.4 | 5.0E-05 | FAM32A   | 35.39  | 49.75  | 0.49 | 1.4 | 5.0E-05 |
| NLRP1                   | 2.39   | 1.75   | -0.45 | 1.4 | 5.0E-05 | TRAF3    | 13.34  | 18.75  | 0.49 | 1.4 | 5.0E-05 |
| PPP2R1B                 | 19.49  | 14.26  | -0.45 | 1.4 | 2.8E-03 | HYI      | 15.23  | 21.41  | 0.49 | 1.4 | 1.1E-02 |
| PRKX                    | 13.97  | 10.22  | -0.45 | 1.4 | 5.0E-05 | MCF2L    | 0.98   | 1.38   | 0.49 | 1.4 | 5.0E-05 |
| GMIP                    | 7.80   | 5.71   | -0.45 | 1.4 | 5.0E-05 | TICRR    | 0.59   | 0.83   | 0.49 | 1.4 | 5.0E-05 |
| TBCC                    | 14.28  | 10.45  | -0.45 | 1.4 | 5.0E-05 | ZNF92    | 2.48   | 3.48   | 0.49 | 1.4 | 5.0E-05 |
| JHDM1D                  | 4.82   | 3.53   | -0.45 | 1.4 | 5.0E-05 | EFHD1    | 1.16   | 1.64   | 0.49 | 1.4 | 8.9E-03 |
| CEMP1                   | 6.80   | 4.98   | -0.45 | 1.4 | 5.0E-05 | SMTN     | 2.73   | 3.83   | 0.49 | 1.4 | 5.0E-05 |
| ABI2                    | 8.35   | 6.12   | -0.45 | 1.4 | 5.0E-05 | NAALADL2 | 0.77   | 1.08   | 0.49 | 1.4 | 5.0E-05 |
| UNC13D                  | 0.61   | 0.45   | -0.45 | 1.4 | 1.1E-02 | C11orf75 | 3.89   | 5.46   | 0.49 | 1.4 | 6.5E-04 |
| CCDC28B,DCDC2B,<br>IQCC | 8.81   | 6.46   | -0.45 | 1.4 | 5.5E-03 | ROR1     | 4.83   | 6.78   | 0.49 | 1.4 | 5.0E-05 |
| FTO                     | 10.18  | 7.46   | -0.45 | 1.4 | 5.0E-05 | GRHL1    | 0.92   | 1.29   | 0.49 | 1.4 | 1.5E-04 |
| NTHL1                   | 6.08   | 4.46   | -0.45 | 1.4 | 7.0E-04 | CPD      | 111.97 | 157.15 | 0.49 | 1.4 | 5.0E-05 |
| LRRC16B                 | 0.80   | 0.59   | -0.45 | 1.4 | 2.4E-03 | TRIOBP   | 24.93  | 34.94  | 0.49 | 1.4 | 5.0E-05 |
| SLC6A15                 | 1.28   | 0.94   | -0.45 | 1.4 | 5.0E-05 | GPR124   | 1.08   | 1.51   | 0.49 | 1.4 | 5.0E-05 |
| DISP1                   | 4.54   | 3.33   | -0.45 | 1.4 | 5.0E-05 | PTPRD    | 17.21  | 24.11  | 0.49 | 1.4 | 5.0E-05 |
| OAS3                    | 90.36  | 66.28  | -0.45 | 1.4 | 5.0E-05 | FAM160A1 | 3.82   | 5.34   | 0.48 | 1.4 | 5.0E-05 |
| SNRPC                   | 47.47  | 34.82  | -0.45 | 1.4 | 5.0E-05 | KIF11    | 3.13   | 4.38   | 0.48 | 1.4 | 5.0E-05 |

|          |       |       |       |     |         |  |                      |        |        |      |     |         |
|----------|-------|-------|-------|-----|---------|--|----------------------|--------|--------|------|-----|---------|
| PAK4     | 13.22 | 9.70  | -0.45 | 1.4 | 5.0E-05 |  | ETAA1                | 5.86   | 8.20   | 0.48 | 1.4 | 5.0E-05 |
| RBP1     | 8.21  | 6.03  | -0.45 | 1.4 | 1.5E-04 |  | COBL                 | 3.84   | 5.36   | 0.48 | 1.4 | 5.0E-05 |
| KCNE4    | 0.83  | 0.61  | -0.45 | 1.4 | 1.1E-02 |  | CCBP2                | 1.29   | 1.81   | 0.48 | 1.4 | 5.0E-05 |
| ZNHIT6   | 28.87 | 21.18 | -0.45 | 1.4 | 3.0E-04 |  | MAK16                | 4.69   | 6.55   | 0.48 | 1.4 | 5.0E-05 |
| EPS8L3   | 6.13  | 4.50  | -0.45 | 1.4 | 5.0E-05 |  | EMP1                 | 101.57 | 141.88 | 0.48 | 1.4 | 5.0E-05 |
| ARHGAP28 | 1.34  | 0.99  | -0.44 | 1.4 | 5.0E-05 |  | PSCA                 | 2.36   | 3.29   | 0.48 | 1.4 | 5.9E-03 |
| RPL22L1  | 20.48 | 15.05 | -0.44 | 1.4 | 5.0E-05 |  | ZNF442,ZNF443,ZNF799 | 2.33   | 3.25   | 0.48 | 1.4 | 5.0E-05 |
| TMED5    | 69.27 | 50.92 | -0.44 | 1.4 | 5.0E-05 |  | TRIP13               | 5.01   | 6.99   | 0.48 | 1.4 | 5.0E-05 |
| SPRY4    | 10.23 | 7.52  | -0.44 | 1.4 | 5.0E-05 |  | LOC728431            | 2.88   | 4.01   | 0.48 | 1.4 | 2.0E-04 |
| CEP97    | 2.54  | 1.87  | -0.44 | 1.4 | 5.0E-05 |  | FAAH2                | 1.86   | 2.60   | 0.48 | 1.4 | 1.0E-04 |
| PNPT1    | 29.31 | 21.56 | -0.44 | 1.4 | 5.0E-05 |  | FOS                  | 2.02   | 2.82   | 0.48 | 1.4 | 5.0E-05 |
| PAX2     | 13.21 | 9.72  | -0.44 | 1.4 | 5.0E-05 |  | ABCC3                | 59.78  | 88.89  | 0.48 | 1.4 | 5.0E-05 |
| SH2B3    | 7.02  | 5.17  | -0.44 | 1.4 | 5.0E-05 |  | KRBA2                | 1.20   | 1.67   | 0.48 | 1.4 | 1.0E-03 |
| SEPSECS  | 3.79  | 2.79  | -0.44 | 1.4 | 5.0E-05 |  | ALG10                | 0.85   | 1.19   | 0.48 | 1.4 | 1.6E-03 |
| CPT1A    | 1.48  | 1.09  | -0.44 | 1.4 | 5.0E-05 |  | STAT3                | 40.02  | 55.68  | 0.48 | 1.4 | 5.0E-05 |
| HMGCS1   | 41.06 | 30.24 | -0.44 | 1.4 | 5.0E-05 |  | ZNF285               | 0.71   | 0.99   | 0.48 | 1.4 | 4.2E-03 |
| ZCCHC14  | 8.23  | 6.06  | -0.44 | 1.4 | 5.0E-05 |  | ZNF544               | 9.03   | 12.55  | 0.48 | 1.4 | 5.0E-05 |
| NEK3     | 6.61  | 4.87  | -0.44 | 1.4 | 5.0E-05 |  | HDAC1                | 34.60  | 48.05  | 0.47 | 1.4 | 5.0E-05 |
| LURAP1L  | 16.32 | 12.03 | -0.44 | 1.4 | 5.0E-05 |  | ZNF627               | 4.63   | 6.43   | 0.47 | 1.4 | 5.0E-05 |
| TRIAP1   | 19.66 | 14.49 | -0.44 | 1.4 | 5.0E-05 |  | PLXDC2               | 2.78   | 3.86   | 0.47 | 1.4 | 5.0E-05 |
| COX10    | 7.43  | 5.48  | -0.44 | 1.4 | 5.0E-05 |  | ZWINT                | 5.64   | 7.83   | 0.47 | 1.4 | 5.0E-05 |
| RAP1GAP  | 3.27  | 2.41  | -0.44 | 1.4 | 5.0E-05 |  | DSEL                 | 0.47   | 0.66   | 0.47 | 1.4 | 1.0E-04 |
| LPAR2    | 13.35 | 9.86  | -0.44 | 1.4 | 5.0E-05 |  | TPX2                 | 8.45   | 11.73  | 0.47 | 1.4 | 5.0E-05 |
| ABCB9    | 1.28  | 0.94  | -0.44 | 1.4 | 5.9E-03 |  | ERI2                 | 2.71   | 3.75   | 0.47 | 1.4 | 5.0E-05 |
| DDRGK1   | 40.79 | 30.13 | -0.44 | 1.4 | 5.0E-05 |  | TSHZ1                | 4.45   | 6.17   | 0.47 | 1.4 | 5.0E-05 |
| ZNF460   | 3.29  | 2.43  | -0.44 | 1.4 | 5.0E-05 |  | CTSL2                | 2.65   | 3.67   | 0.47 | 1.4 | 5.0E-05 |
| GBP1     | 23.50 | 17.36 | -0.44 | 1.4 | 5.0E-05 |  | TCTA                 | 9.68   | 13.41  | 0.47 | 1.4 | 5.0E-05 |
| TCP11L2  | 10.46 | 7.73  | -0.44 | 1.4 | 5.0E-05 |  | POLE2                | 1.07   | 1.48   | 0.47 | 1.4 | 8.3E-03 |
| CCDC85B  | 4.25  | 3.14  | -0.44 | 1.4 | 5.0E-05 |  | TSTD3                | 1.72   | 2.38   | 0.47 | 1.4 | 3.0E-04 |
| SLC25A11 | 28.15 | 20.82 | -0.44 | 1.4 | 2.2E-03 |  | KRT10                | 38.51  | 53.32  | 0.47 | 1.4 | 5.0E-05 |
| QPCTL    | 9.99  | 7.39  | -0.44 | 1.4 | 5.0E-05 |  | EPHB2                | 21.16  | 29.29  | 0.47 | 1.4 | 5.0E-05 |
| PDZK1    | 8.01  | 5.92  | -0.43 | 1.4 | 5.0E-05 |  | PTPRJ                | 30.08  | 41.63  | 0.47 | 1.4 | 5.0E-05 |
| RRP9     | 10.60 | 7.84  | -0.43 | 1.4 | 5.0E-05 |  | DUSP23               | 37.86  | 52.40  | 0.47 | 1.4 | 5.0E-05 |
| LRRC1    | 20.53 | 15.19 | -0.43 | 1.4 | 5.0E-05 |  | WNK2                 | 1.17   | 1.62   | 0.47 | 1.4 | 5.0E-05 |
| JAG1     | 14.06 | 10.41 | -0.43 | 1.4 | 5.0E-05 |  | SGK223               | 5.36   | 7.41   | 0.47 | 1.4 | 5.0E-05 |
| TMTC1    | 2.16  | 1.60  | -0.43 | 1.4 | 4.1E-03 |  | ZNF134,ZNF211        | 8.37   | 11.56  | 0.47 | 1.4 | 5.0E-05 |
| KHSRP    | 41.77 | 30.92 | -0.43 | 1.4 | 5.0E-05 |  | HELLS                | 1.08   | 1.49   | 0.47 | 1.4 | 1.0E-04 |

|                |        |        |       |     |         |  |              |        |        |      |     |         |
|----------------|--------|--------|-------|-----|---------|--|--------------|--------|--------|------|-----|---------|
| MINK1          | 27.93  | 20.68  | -0.43 | 1.4 | 5.0E-05 |  | ZNF736       | 2.39   | 3.30   | 0.47 | 1.4 | 5.0E-05 |
| C19orf66       | 37.64  | 27.88  | -0.43 | 1.4 | 5.0E-05 |  | IGFBP6       | 3.75   | 5.17   | 0.46 | 1.4 | 2.1E-03 |
| COQ10A         | 5.68   | 4.21   | -0.43 | 1.4 | 5.0E-05 |  | LOC645212    | 2.93   | 4.04   | 0.46 | 1.4 | 9.0E-04 |
| HELZ           | 8.80   | 6.52   | -0.43 | 1.3 | 5.0E-05 |  | GINS3        | 2.09   | 2.88   | 0.46 | 1.4 | 5.0E-05 |
| WARS           | 233.74 | 173.21 | -0.43 | 1.3 | 5.0E-05 |  | WDR1         | 95.88  | 132.26 | 0.46 | 1.4 | 5.0E-05 |
| PUS1           | 12.79  | 9.48   | -0.43 | 1.3 | 5.0E-05 |  | PAQR5        | 1.23   | 1.70   | 0.46 | 1.4 | 5.0E-05 |
| ANK2           | 3.53   | 2.61   | -0.43 | 1.3 | 1.0E-04 |  | SUMF1        | 10.88  | 15.00  | 0.46 | 1.4 | 5.0E-05 |
| FBXO6          | 19.33  | 14.33  | -0.43 | 1.3 | 5.0E-05 |  | DIP2C        | 3.27   | 4.51   | 0.46 | 1.4 | 5.0E-05 |
| ADAMTS3        | 7.73   | 5.73   | -0.43 | 1.3 | 5.0E-05 |  | LIMK1        | 17.09  | 23.54  | 0.46 | 1.4 | 5.0E-05 |
| PTHLH          | 20.11  | 14.92  | -0.43 | 1.3 | 5.0E-05 |  | NOL12        | 10.86  | 14.95  | 0.46 | 1.4 | 5.0E-05 |
| ACP2           | 24.69  | 18.32  | -0.43 | 1.3 | 5.0E-05 |  | SMIM11       | 10.17  | 14.00  | 0.46 | 1.4 | 5.0E-05 |
| CMAS           | 21.02  | 15.60  | -0.43 | 1.3 | 5.0E-05 |  | PTPRF        | 26.81  | 36.90  | 0.46 | 1.4 | 5.0E-05 |
| SEMA3A         | 3.10   | 2.30   | -0.43 | 1.3 | 5.0E-05 |  | ZNF418       | 1.30   | 1.78   | 0.46 | 1.4 | 5.0E-05 |
| CYP4F11        | 33.10  | 24.57  | -0.43 | 1.3 | 5.0E-05 |  | FSTL3        | 19.31  | 26.54  | 0.46 | 1.4 | 5.0E-05 |
| PPM1K          | 14.81  | 11.00  | -0.43 | 1.3 | 5.0E-05 |  | FMNL1        | 2.64   | 3.63   | 0.46 | 1.4 | 5.0E-05 |
| TTC37          | 31.00  | 23.03  | -0.43 | 1.3 | 5.0E-05 |  | COTL1        | 155.75 | 214.10 | 0.46 | 1.4 | 5.0E-05 |
| DHCR7          | 63.43  | 47.12  | -0.43 | 1.3 | 5.0E-05 |  | METAP1D      | 2.75   | 3.77   | 0.46 | 1.4 | 3.5E-03 |
| C10orf137      | 8.78   | 6.52   | -0.43 | 1.3 | 5.0E-05 |  | ARHGEF39     | 3.20   | 4.40   | 0.46 | 1.4 | 5.0E-05 |
| AMZ2P1         | 1.06   | 0.79   | -0.43 | 1.3 | 3.7E-03 |  | ZCCHC3       | 6.12   | 8.41   | 0.46 | 1.4 | 5.0E-05 |
| PTGFR          | 0.87   | 0.64   | -0.43 | 1.3 | 6.5E-04 |  | ZNF20,ZNF625 | 5.74   | 7.88   | 0.46 | 1.4 | 5.0E-05 |
| MFS12          | 39.83  | 29.60  | -0.43 | 1.3 | 2.0E-04 |  | MOB3B        | 1.65   | 2.26   | 0.46 | 1.4 | 5.0E-05 |
| HYOU1          | 202.09 | 150.22 | -0.43 | 1.3 | 5.0E-05 |  | UNC5CL       | 4.50   | 6.17   | 0.46 | 1.4 | 5.0E-05 |
| EPS15L1        | 42.21  | 31.38  | -0.43 | 1.3 | 5.0E-05 |  | ALDH3B1      | 17.91  | 24.57  | 0.46 | 1.4 | 5.0E-05 |
| METRN          | 11.25  | 8.37   | -0.43 | 1.3 | 5.0E-05 |  | FHDC1        | 6.81   | 9.33   | 0.46 | 1.4 | 5.0E-05 |
| EGF            | 1.63   | 1.21   | -0.43 | 1.3 | 5.0E-05 |  | SGOL2        | 1.49   | 2.04   | 0.46 | 1.4 | 5.0E-05 |
| IL12RB2        | 0.70   | 0.52   | -0.43 | 1.3 | 6.8E-03 |  | IDNK         | 2.83   | 3.88   | 0.46 | 1.4 | 3.8E-03 |
| USP11          | 13.07  | 9.72   | -0.43 | 1.3 | 5.0E-05 |  | CFI          | 46.96  | 64.40  | 0.46 | 1.4 | 5.0E-05 |
| ARPC5L         | 40.35  | 30.02  | -0.43 | 1.3 | 5.0E-05 |  | GNPDA1       | 25.19  | 34.54  | 0.46 | 1.4 | 5.0E-05 |
| SLC45A4        | 5.66   | 4.21   | -0.43 | 1.3 | 5.0E-05 |  | ZNF480       | 3.80   | 5.22   | 0.46 | 1.4 | 5.0E-05 |
| KIAA0513       | 6.89   | 5.12   | -0.43 | 1.3 | 5.0E-05 |  | ZNF71        | 2.85   | 3.91   | 0.46 | 1.4 | 5.0E-05 |
| TRIM14         | 37.74  | 28.08  | -0.43 | 1.3 | 5.0E-05 |  | SEPT8        | 13.27  | 18.19  | 0.46 | 1.4 | 5.0E-05 |
| CPSF2          | 15.51  | 11.55  | -0.43 | 1.3 | 5.0E-05 |  | DANCR        | 17.32  | 23.73  | 0.45 | 1.4 | 5.0E-05 |
| C7orf29,LRRC61 | 37.73  | 28.09  | -0.43 | 1.3 | 2.0E-04 |  | SIDT2,TAGLN  | 11.20  | 15.35  | 0.45 | 1.4 | 5.0E-03 |
| ZFYVE26        | 8.90   | 6.63   | -0.43 | 1.3 | 5.0E-05 |  | KIF1C        | 27.83  | 38.12  | 0.45 | 1.4 | 5.0E-05 |
| VSIG1          | 1.52   | 1.13   | -0.43 | 1.3 | 9.5E-04 |  | GXYLT2       | 3.43   | 4.69   | 0.45 | 1.4 | 5.0E-05 |
| KIF7           | 1.11   | 0.83   | -0.43 | 1.3 | 2.7E-03 |  | ANO5         | 0.55   | 0.76   | 0.45 | 1.4 | 4.0E-04 |
| MTMR11         | 6.31   | 4.70   | -0.42 | 1.3 | 5.0E-05 |  | COL8A1       | 34.81  | 47.65  | 0.45 | 1.4 | 5.0E-05 |
| UHMK1          | 26.34  | 19.62  | -0.42 | 1.3 | 5.0E-05 |  | COQ2         | 8.83   | 12.09  | 0.45 | 1.4 | 5.0E-05 |

|              |        |        |       |     |         |  |                 |       |       |      |     |         |
|--------------|--------|--------|-------|-----|---------|--|-----------------|-------|-------|------|-----|---------|
| ZSWIM3       | 1.16   | 0.86   | -0.42 | 1.3 | 5.5E-03 |  | PSD3            | 8.62  | 11.79 | 0.45 | 1.4 | 5.0E-05 |
| NGLY1        | 13.83  | 10.30  | -0.42 | 1.3 | 5.0E-05 |  | CENPJ           | 1.26  | 1.72  | 0.45 | 1.4 | 5.0E-05 |
| CCDC90A      | 14.18  | 10.57  | -0.42 | 1.3 | 5.0E-05 |  | ITGAE           | 6.25  | 8.55  | 0.45 | 1.4 | 1.5E-04 |
| GGT1         | 14.86  | 11.08  | -0.42 | 1.3 | 5.0E-05 |  | ZNF160          | 5.89  | 8.04  | 0.45 | 1.4 | 5.0E-05 |
| LIN52        | 4.47   | 3.33   | -0.42 | 1.3 | 5.0E-05 |  | USP2            | 0.71  | 0.97  | 0.45 | 1.4 | 6.9E-03 |
| NUDT21       | 18.97  | 14.15  | -0.42 | 1.3 | 5.0E-05 |  | AUTS2           | 1.45  | 1.98  | 0.45 | 1.4 | 1.0E-04 |
| LOC374443    | 3.51   | 2.61   | -0.42 | 1.3 | 5.0E-05 |  | CTSF            | 1.41  | 1.92  | 0.45 | 1.4 | 2.9E-03 |
| FGFBP1       | 190.46 | 142.12 | -0.42 | 1.3 | 5.0E-05 |  | SSH3            | 13.64 | 18.61 | 0.45 | 1.4 | 5.0E-05 |
| KDM1B        | 8.63   | 6.44   | -0.42 | 1.3 | 5.0E-05 |  | PHTF2           | 4.13  | 5.63  | 0.45 | 1.4 | 5.0E-05 |
| CTPS1        | 27.02  | 20.17  | -0.42 | 1.3 | 5.0E-05 |  | PPP1R13L        | 10.79 | 14.70 | 0.45 | 1.4 | 7.5E-03 |
| NAGLU        | 22.36  | 16.70  | -0.42 | 1.3 | 5.0E-05 |  | ZNF514          | 5.43  | 7.41  | 0.45 | 1.4 | 5.0E-05 |
| CAD          | 8.93   | 6.67   | -0.42 | 1.3 | 5.0E-05 |  | C11orf82        | 0.56  | 0.76  | 0.45 | 1.4 | 6.7E-03 |
| PTGES        | 12.91  | 9.65   | -0.42 | 1.3 | 5.0E-05 |  | GP1BB,SEPT5     | 1.17  | 1.59  | 0.45 | 1.4 | 9.4E-03 |
| ACLY         | 106.22 | 79.38  | -0.42 | 1.3 | 5.0E-05 |  | ATP10B          | 0.57  | 0.78  | 0.45 | 1.4 | 1.0E-04 |
| IGFN1        | 14.89  | 11.13  | -0.42 | 1.3 | 5.0E-05 |  | KIF20B          | 3.60  | 4.90  | 0.45 | 1.4 | 5.0E-05 |
| PHLDA3       | 25.17  | 18.81  | -0.42 | 1.3 | 5.0E-05 |  | AADAT           | 1.42  | 1.93  | 0.45 | 1.4 | 1.3E-03 |
| SLC31A1      | 23.63  | 17.67  | -0.42 | 1.3 | 5.0E-05 |  | ZSCAN18         | 5.70  | 7.76  | 0.45 | 1.4 | 5.0E-05 |
| THRA         | 4.87   | 3.65   | -0.42 | 1.3 | 5.0E-05 |  | LYRM9           | 5.06  | 6.89  | 0.44 | 1.4 | 5.0E-05 |
| RFX3         | 2.17   | 1.63   | -0.42 | 1.3 | 5.0E-05 |  | PGM2L1          | 7.42  | 10.09 | 0.44 | 1.4 | 5.0E-05 |
| AMER1        | 2.00   | 1.50   | -0.42 | 1.3 | 5.0E-05 |  | ZNF578          | 0.63  | 0.86  | 0.44 | 1.4 | 1.5E-04 |
| INO80C       | 9.37   | 7.02   | -0.42 | 1.3 | 1.5E-04 |  | PFKL            | 21.23 | 28.88 | 0.44 | 1.4 | 5.0E-05 |
| LOC100289137 | 8.43   | 6.32   | -0.42 | 1.3 | 5.0E-05 |  | PTPRG           | 7.41  | 10.08 | 0.44 | 1.4 | 5.0E-05 |
| HECTD4       | 9.51   | 7.12   | -0.42 | 1.3 | 5.0E-05 |  | GYS1            | 16.55 | 22.51 | 0.44 | 1.4 | 5.0E-05 |
| TMEM144      | 6.17   | 4.63   | -0.42 | 1.3 | 5.0E-05 |  | ZNF317          | 7.39  | 10.05 | 0.44 | 1.4 | 5.0E-05 |
| SLC5A9       | 0.98   | 0.74   | -0.42 | 1.3 | 7.4E-03 |  | C14orf80        | 1.73  | 2.36  | 0.44 | 1.4 | 5.8E-03 |
| EDC4         | 13.78  | 10.33  | -0.42 | 1.3 | 5.0E-05 |  | STOX2           | 0.99  | 1.34  | 0.44 | 1.4 | 5.0E-05 |
| ATN1         | 36.87  | 27.63  | -0.42 | 1.3 | 5.0E-05 |  | ZNF227          | 2.76  | 3.75  | 0.44 | 1.4 | 5.0E-05 |
| CLDN12       | 29.81  | 22.36  | -0.42 | 1.3 | 5.0E-05 |  | ZNF23           | 4.84  | 6.57  | 0.44 | 1.4 | 5.0E-05 |
| HIRA         | 18.71  | 14.03  | -0.41 | 1.3 | 5.0E-05 |  | ZFP62           | 3.46  | 4.70  | 0.44 | 1.4 | 5.0E-05 |
| ARHGAP24     | 6.27   | 4.70   | -0.41 | 1.3 | 5.0E-05 |  | C19orf18,ZNF606 | 2.62  | 3.55  | 0.44 | 1.4 | 3.5E-04 |
| CEACAM1      | 3.69   | 2.77   | -0.41 | 1.3 | 5.0E-05 |  | ZNF184          | 2.24  | 3.05  | 0.44 | 1.4 | 5.0E-05 |
| LRAT         | 2.38   | 1.79   | -0.41 | 1.3 | 5.0E-05 |  | ZNF300          | 3.63  | 4.93  | 0.44 | 1.4 | 5.0E-05 |
| SLC25A28     | 22.12  | 16.60  | -0.41 | 1.3 | 5.0E-05 |  | PTTG1           | 31.81 | 43.19 | 0.44 | 1.4 | 5.0E-05 |
| ROGDI        | 4.32   | 3.25   | -0.41 | 1.3 | 3.0E-04 |  | SLC6A8          | 27.44 | 37.26 | 0.44 | 1.4 | 5.0E-05 |
| LMNB2        | 12.39  | 9.30   | -0.41 | 1.3 | 5.0E-05 |  | STEAP3          | 18.51 | 25.12 | 0.44 | 1.4 | 5.0E-05 |
| DOK7         | 3.21   | 2.41   | -0.41 | 1.3 | 5.0E-04 |  | WBP11           | 19.06 | 25.87 | 0.44 | 1.4 | 5.0E-05 |
| MFSD7        | 5.28   | 3.96   | -0.41 | 1.3 | 6.5E-04 |  | PCNXL3          | 9.38  | 12.73 | 0.44 | 1.4 | 5.0E-05 |
| KCND1        | 1.41   | 1.06   | -0.41 | 1.3 | 5.0E-05 |  | ARHGAP21        | 13.11 | 17.78 | 0.44 | 1.4 | 5.0E-05 |

|            |        |        |       |     |         |  |                         |        |        |      |     |         |
|------------|--------|--------|-------|-----|---------|--|-------------------------|--------|--------|------|-----|---------|
| BAMBI      | 6.37   | 4.78   | -0.41 | 1.3 | 5.0E-05 |  | GLTP                    | 7.99   | 10.84  | 0.44 | 1.4 | 5.0E-05 |
| VWA5A      | 16.38  | 12.30  | -0.41 | 1.3 | 5.0E-05 |  | CTTN                    | 130.82 | 177.39 | 0.44 | 1.4 | 5.0E-05 |
| FAHD2A     | 9.21   | 6.92   | -0.41 | 1.3 | 5.0E-05 |  | FRMD6                   | 5.51   | 7.47   | 0.44 | 1.4 | 5.0E-05 |
| IFIT5      | 29.74  | 22.35  | -0.41 | 1.3 | 5.0E-05 |  | BCAM                    | 24.25  | 32.86  | 0.44 | 1.4 | 5.0E-05 |
| DAPP1      | 9.45   | 7.11   | -0.41 | 1.3 | 5.0E-05 |  | KIF26B                  | 5.33   | 7.23   | 0.44 | 1.4 | 5.0E-05 |
| C17orf51   | 2.28   | 1.71   | -0.41 | 1.3 | 5.0E-05 |  | HTRA1                   | 4.90   | 6.63   | 0.44 | 1.4 | 5.0E-05 |
| MEF2A      | 20.47  | 15.40  | -0.41 | 1.3 | 5.0E-05 |  | ARRDC3                  | 33.27  | 45.07  | 0.44 | 1.4 | 5.0E-05 |
| FAM167A    | 10.25  | 7.72   | -0.41 | 1.3 | 5.0E-05 |  | ZNF493                  | 1.34   | 1.82   | 0.44 | 1.4 | 5.5E-04 |
| B3GAT3     | 26.70  | 20.10  | -0.41 | 1.3 | 5.0E-05 |  | PRKRIR                  | 14.39  | 19.49  | 0.44 | 1.4 | 5.0E-05 |
| PADI1      | 10.42  | 7.85   | -0.41 | 1.3 | 5.0E-05 |  | PODXL                   | 1.07   | 1.44   | 0.44 | 1.4 | 5.0E-05 |
| HECA       | 4.44   | 3.34   | -0.41 | 1.3 | 5.0E-05 |  | SNUPN                   | 8.95   | 12.12  | 0.44 | 1.4 | 5.0E-05 |
| SLC6A9     | 11.77  | 8.87   | -0.41 | 1.3 | 5.0E-05 |  | TDRKH                   | 2.87   | 3.89   | 0.44 | 1.4 | 9.8E-03 |
| DFNA5      | 26.25  | 19.78  | -0.41 | 1.3 | 5.0E-05 |  | ZNF287                  | 0.83   | 1.12   | 0.44 | 1.4 | 5.5E-04 |
| KIF3A      | 6.03   | 4.55   | -0.41 | 1.3 | 5.0E-05 |  | CCDC18,LOC10013<br>1564 | 3.26   | 4.41   | 0.44 | 1.4 | 5.0E-05 |
| PRKD2      | 28.23  | 21.29  | -0.41 | 1.3 | 5.0E-05 |  | SAPCD2                  | 2.40   | 3.25   | 0.44 | 1.4 | 5.0E-05 |
| FAM83G     | 12.80  | 9.65   | -0.41 | 1.3 | 5.0E-05 |  | ZNF140                  | 5.42   | 7.33   | 0.44 | 1.4 | 5.0E-05 |
| BAK1       | 23.85  | 18.01  | -0.41 | 1.3 | 5.0E-05 |  | UBE2T                   | 4.10   | 5.54   | 0.43 | 1.4 | 1.5E-03 |
| DMRTA1     | 3.19   | 2.41   | -0.41 | 1.3 | 5.0E-05 |  | ZBTB5                   | 4.60   | 6.22   | 0.43 | 1.4 | 5.0E-05 |
| PLAGL2     | 5.70   | 4.31   | -0.40 | 1.3 | 5.0E-05 |  | MAD2L1                  | 7.13   | 9.63   | 0.43 | 1.4 | 5.0E-05 |
| INTS7      | 5.75   | 4.35   | -0.40 | 1.3 | 5.0E-05 |  | CLSPN                   | 0.44   | 0.59   | 0.43 | 1.3 | 7.0E-04 |
| TOE1       | 3.21   | 2.43   | -0.40 | 1.3 | 3.8E-03 |  | DPY19L1                 | 12.78  | 17.25  | 0.43 | 1.3 | 5.0E-05 |
| EIF2AK2    | 59.96  | 45.38  | -0.40 | 1.3 | 5.0E-05 |  | ISCA1                   | 12.98  | 17.51  | 0.43 | 1.3 | 5.0E-05 |
| SEC23B     | 50.05  | 37.89  | -0.40 | 1.3 | 5.0E-05 |  | TIFA                    | 4.14   | 5.59   | 0.43 | 1.3 | 5.0E-05 |
| C12orf52   | 21.97  | 16.63  | -0.40 | 1.3 | 5.0E-05 |  | ZNF652                  | 4.95   | 6.68   | 0.43 | 1.3 | 5.0E-05 |
| KIAA0586   | 3.67   | 2.78   | -0.40 | 1.3 | 9.7E-03 |  | MMS22L                  | 0.79   | 1.06   | 0.43 | 1.3 | 5.0E-05 |
| LRRC49     | 2.89   | 2.19   | -0.40 | 1.3 | 3.0E-04 |  | GPR68                   | 0.86   | 1.16   | 0.43 | 1.3 | 7.7E-03 |
| FRYL       | 9.57   | 7.26   | -0.40 | 1.3 | 5.0E-05 |  | DROSHA                  | 6.95   | 9.36   | 0.43 | 1.3 | 5.0E-05 |
| GUCY1B3    | 5.75   | 4.36   | -0.40 | 1.3 | 5.0E-05 |  | ARHGEF10                | 7.34   | 9.89   | 0.43 | 1.3 | 5.0E-05 |
| PLSCR4     | 3.13   | 2.37   | -0.40 | 1.3 | 5.0E-05 |  | ZNF33B                  | 4.61   | 6.21   | 0.43 | 1.3 | 5.0E-05 |
| STARD4     | 26.54  | 20.13  | -0.40 | 1.3 | 2.0E-04 |  | SEPP1                   | 8.31   | 11.19  | 0.43 | 1.3 | 5.0E-05 |
| SOCS2      | 3.16   | 2.40   | -0.40 | 1.3 | 5.0E-05 |  | ZNF18                   | 1.89   | 2.55   | 0.43 | 1.3 | 5.0E-05 |
| IRF7       | 47.04  | 35.69  | -0.40 | 1.3 | 5.0E-05 |  | NT5DC2                  | 19.15  | 25.77  | 0.43 | 1.3 | 5.0E-05 |
| PSMB8,TAP1 | 188.32 | 142.92 | -0.40 | 1.3 | 5.0E-05 |  | EAPP                    | 21.04  | 28.32  | 0.43 | 1.3 | 5.0E-05 |
| DYRK4      | 14.77  | 11.21  | -0.40 | 1.3 | 5.0E-05 |  | ST8SIA2                 | 4.74   | 6.37   | 0.43 | 1.3 | 5.0E-05 |
| SLC1A1     | 9.19   | 6.98   | -0.40 | 1.3 | 5.0E-05 |  | CXCR7                   | 1.29   | 1.74   | 0.43 | 1.3 | 5.0E-03 |
| NAPA       | 115.91 | 88.02  | -0.40 | 1.3 | 5.0E-05 |  | NARF                    | 11.17  | 15.02  | 0.43 | 1.3 | 5.0E-05 |
| NAT1       | 4.39   | 3.34   | -0.40 | 1.3 | 1.0E-04 |  | TMLHE                   | 7.01   | 9.43   | 0.43 | 1.3 | 5.0E-05 |

|               |        |        |       |     |         |  |                                         |        |        |      |     |         |
|---------------|--------|--------|-------|-----|---------|--|-----------------------------------------|--------|--------|------|-----|---------|
| PLSCR1        | 199.89 | 151.83 | -0.40 | 1.3 | 5.0E-05 |  | CLDN11                                  | 76.15  | 102.40 | 0.43 | 1.3 | 5.0E-05 |
| GBP5          | 2.54   | 1.93   | -0.40 | 1.3 | 5.0E-05 |  | IFFO2                                   | 3.10   | 4.16   | 0.43 | 1.3 | 5.0E-05 |
| EPSTI1        | 44.54  | 33.85  | -0.40 | 1.3 | 5.0E-05 |  | RASA3                                   | 14.33  | 19.26  | 0.43 | 1.3 | 5.0E-05 |
| SLC2A11       | 10.57  | 8.03   | -0.40 | 1.3 | 5.0E-05 |  | ZUFSP                                   | 5.46   | 7.34   | 0.43 | 1.3 | 5.0E-05 |
| C9orf47,S1PR3 | 0.71   | 0.54   | -0.40 | 1.3 | 1.2E-02 |  | PHF10                                   | 21.39  | 28.73  | 0.43 | 1.3 | 5.3E-03 |
| ARHGEF40      | 7.55   | 5.74   | -0.39 | 1.3 | 2.5E-04 |  | CYB5D2                                  | 12.38  | 16.63  | 0.43 | 1.3 | 5.0E-05 |
| PROCR         | 25.53  | 19.42  | -0.39 | 1.3 | 5.0E-05 |  | GLS                                     | 121.67 | 163.41 | 0.43 | 1.3 | 9.1E-03 |
| CCDC28A       | 8.50   | 6.47   | -0.39 | 1.3 | 5.0E-05 |  | LOC92249                                | 3.40   | 4.56   | 0.43 | 1.3 | 5.0E-05 |
| PTK2B         | 18.24  | 13.88  | -0.39 | 1.3 | 5.0E-05 |  | KDM2B                                   | 4.75   | 6.38   | 0.42 | 1.3 | 5.0E-05 |
| SLC22A18      | 1.90   | 1.45   | -0.39 | 1.3 | 4.6E-03 |  | POC1A                                   | 2.27   | 3.05   | 0.42 | 1.3 | 4.5E-04 |
| NEURL3        | 15.09  | 11.48  | -0.39 | 1.3 | 5.0E-05 |  | PON3                                    | 2.67   | 3.57   | 0.42 | 1.3 | 3.2E-03 |
| TMEM129       | 22.46  | 17.10  | -0.39 | 1.3 | 6.0E-04 |  | ADARB1                                  | 4.07   | 5.46   | 0.42 | 1.3 | 5.0E-05 |
| UBE2Q1        | 24.95  | 19.00  | -0.39 | 1.3 | 5.0E-05 |  | KLHL23,PHOSPHO2<br>,PHOSPHO2-<br>KLHL23 | 6.34   | 8.50   | 0.42 | 1.3 | 5.0E-05 |
| FEM1C         | 19.68  | 14.99  | -0.39 | 1.3 | 5.0E-05 |  | ZNF568                                  | 1.80   | 2.41   | 0.42 | 1.3 | 3.0E-04 |
| TBC1D20       | 23.07  | 17.57  | -0.39 | 1.3 | 5.0E-05 |  | CNNM2                                   | 1.48   | 1.98   | 0.42 | 1.3 | 9.5E-04 |
| THAP7         | 10.93  | 8.33   | -0.39 | 1.3 | 5.0E-05 |  | CCNF                                    | 2.97   | 3.98   | 0.42 | 1.3 | 5.0E-05 |
| GPR157        | 4.06   | 3.09   | -0.39 | 1.3 | 2.5E-04 |  | GRB10                                   | 11.25  | 15.06  | 0.42 | 1.3 | 5.0E-05 |
| ALCAM         | 204.15 | 155.58 | -0.39 | 1.3 | 5.0E-05 |  | ZNF273                                  | 0.63   | 0.85   | 0.42 | 1.3 | 2.6E-03 |
| DYRK1A        | 13.68  | 10.43  | -0.39 | 1.3 | 5.0E-05 |  | ZNF583                                  | 1.65   | 2.20   | 0.42 | 1.3 | 1.5E-04 |
| AGPAT9        | 15.69  | 11.97  | -0.39 | 1.3 | 5.0E-05 |  | ANXA1                                   | 302.32 | 404.70 | 0.42 | 1.3 | 5.0E-05 |
| HOOK1         | 41.94  | 31.99  | -0.39 | 1.3 | 5.0E-05 |  | LIG1                                    | 2.95   | 3.95   | 0.42 | 1.3 | 5.0E-05 |
| LEPREL4       | 14.52  | 11.08  | -0.39 | 1.3 | 5.0E-05 |  | TYRO3                                   | 1.55   | 2.08   | 0.42 | 1.3 | 5.0E-05 |
| VPS39         | 18.38  | 14.03  | -0.39 | 1.3 | 5.0E-05 |  | NLGN1                                   | 3.57   | 4.78   | 0.42 | 1.3 | 5.0E-05 |
| STAC          | 11.88  | 9.07   | -0.39 | 1.3 | 5.0E-05 |  | NTN4                                    | 54.20  | 72.48  | 0.42 | 1.3 | 5.0E-05 |
| TBC1D8B       | 3.21   | 2.45   | -0.39 | 1.3 | 5.0E-05 |  | NENF                                    | 16.90  | 22.59  | 0.42 | 1.3 | 5.0E-05 |
| NDUFV3        | 20.31  | 15.53  | -0.39 | 1.3 | 5.0E-05 |  | ZNF761                                  | 5.96   | 7.96   | 0.42 | 1.3 | 5.0E-05 |
| UGCG          | 155.28 | 118.76 | -0.39 | 1.3 | 5.0E-05 |  | HEMK1                                   | 2.41   | 3.22   | 0.42 | 1.3 | 5.0E-05 |
| CCDC132       | 5.27   | 4.03   | -0.39 | 1.3 | 9.0E-03 |  | VNN1                                    | 22.11  | 29.55  | 0.42 | 1.3 | 5.0E-05 |
| DMXL2         | 4.33   | 3.31   | -0.39 | 1.3 | 5.0E-05 |  | PM20D2                                  | 8.44   | 11.27  | 0.42 | 1.3 | 5.0E-05 |
| CXorf38       | 13.54  | 10.38  | -0.38 | 1.3 | 5.0E-05 |  | ADAMTS9                                 | 48.57  | 64.90  | 0.42 | 1.3 | 5.0E-05 |
| CD34          | 1.28   | 0.98   | -0.38 | 1.3 | 1.1E-02 |  | DNA2                                    | 1.61   | 2.16   | 0.42 | 1.3 | 5.0E-05 |
| CDR2L         | 18.19  | 13.96  | -0.38 | 1.3 | 5.0E-05 |  | TMEM192                                 | 11.39  | 15.22  | 0.42 | 1.3 | 5.0E-05 |
| NTM           | 5.32   | 4.08   | -0.38 | 1.3 | 5.0E-05 |  | CNTRL                                   | 0.71   | 0.95   | 0.42 | 1.3 | 5.0E-05 |
| MITF          | 12.42  | 9.54   | -0.38 | 1.3 | 5.0E-05 |  | SIPA1L1                                 | 20.13  | 26.89  | 0.42 | 1.3 | 5.0E-05 |
| SERPING1      | 29.78  | 22.87  | -0.38 | 1.3 | 5.0E-05 |  | TPM2                                    | 86.81  | 115.94 | 0.42 | 1.3 | 5.0E-05 |
| STAT2         | 57.22  | 43.95  | -0.38 | 1.3 | 5.0E-05 |  | CA8                                     | 11.17  | 14.91  | 0.42 | 1.3 | 1.0E-04 |



|                |       |       |       |     |         |  |            |       |        |      |     |         |
|----------------|-------|-------|-------|-----|---------|--|------------|-------|--------|------|-----|---------|
| TUBGCP6        | 8.31  | 6.38  | -0.38 | 1.3 | 2.5E-03 |  | RHOB       | 22.71 | 30.32  | 0.42 | 1.3 | 5.0E-05 |
| CTDSP1         | 29.43 | 22.63 | -0.38 | 1.3 | 5.0E-05 |  | FANCD2     | 2.60  | 3.48   | 0.42 | 1.3 | 5.0E-05 |
| ZNF580         | 19.07 | 14.67 | -0.38 | 1.3 | 5.0E-05 |  | IMMP2L     | 6.40  | 8.54   | 0.42 | 1.3 | 5.0E-05 |
| RALGAPA1       | 6.36  | 4.89  | -0.38 | 1.3 | 5.0E-05 |  | CMTM4      | 13.08 | 17.46  | 0.42 | 1.3 | 5.0E-05 |
| FAM65A         | 20.01 | 15.39 | -0.38 | 1.3 | 5.0E-05 |  | PTRF       | 22.31 | 29.77  | 0.42 | 1.3 | 5.0E-05 |
| ZNRF1          | 3.33  | 2.56  | -0.38 | 1.3 | 5.0E-05 |  | FANCI      | 3.68  | 4.91   | 0.42 | 1.3 | 1.0E-02 |
| SDE2           | 10.62 | 8.17  | -0.38 | 1.3 | 5.0E-05 |  | HPD        | 2.11  | 2.81   | 0.42 | 1.3 | 2.8E-03 |
| H1FX           | 22.52 | 17.33 | -0.38 | 1.3 | 5.0E-05 |  | PPP3CB     | 14.61 | 19.48  | 0.42 | 1.3 | 5.0E-05 |
| EFNB3          | 2.06  | 1.59  | -0.38 | 1.3 | 2.5E-04 |  | ID1        | 9.99  | 13.33  | 0.42 | 1.3 | 5.0E-05 |
| LOC100128252   | 4.21  | 3.24  | -0.38 | 1.3 | 3.0E-03 |  | BLVRB      | 35.43 | 47.25  | 0.42 | 1.3 | 5.0E-05 |
| PRKD3          | 22.38 | 17.24 | -0.38 | 1.3 | 5.0E-05 |  | NUDT1      | 11.05 | 14.73  | 0.42 | 1.3 | 5.0E-05 |
| VILL           | 1.97  | 1.52  | -0.38 | 1.3 | 2.3E-03 |  | MKNK2      | 64.68 | 86.22  | 0.41 | 1.3 | 5.0E-05 |
| PPP1R1A        | 2.13  | 1.64  | -0.38 | 1.3 | 8.9E-03 |  | PITPNM3    | 5.25  | 6.99   | 0.41 | 1.3 | 5.0E-05 |
| LOC728323      | 7.10  | 5.47  | -0.38 | 1.3 | 6.0E-04 |  | MAP4K4     | 31.51 | 41.95  | 0.41 | 1.3 | 5.0E-05 |
| PNMA6C,PNMA6D  | 2.73  | 2.10  | -0.38 | 1.3 | 1.3E-03 |  | LRG1       | 8.03  | 10.68  | 0.41 | 1.3 | 5.0E-05 |
| JAK2           | 4.80  | 3.70  | -0.38 | 1.3 | 5.0E-05 |  | HSDL2      | 8.71  | 11.59  | 0.41 | 1.3 | 5.0E-05 |
| STRN3          | 15.73 | 12.13 | -0.38 | 1.3 | 5.0E-05 |  | TCF3       | 13.67 | 18.19  | 0.41 | 1.3 | 5.0E-05 |
| KLHL13         | 16.03 | 12.36 | -0.38 | 1.3 | 5.0E-05 |  | ME1        | 12.10 | 16.09  | 0.41 | 1.3 | 5.0E-05 |
| NPR1           | 1.60  | 1.24  | -0.37 | 1.3 | 8.0E-04 |  | ADRB2      | 5.58  | 7.42   | 0.41 | 1.3 | 5.0E-05 |
| EPG5           | 6.80  | 5.25  | -0.37 | 1.3 | 5.0E-05 |  | TUBA1A     | 12.45 | 16.55  | 0.41 | 1.3 | 5.0E-05 |
| RAB42          | 13.22 | 10.21 | -0.37 | 1.3 | 1.3E-03 |  | NEDD9      | 31.48 | 42.09  | 0.41 | 1.3 | 5.0E-05 |
| DDX60L         | 35.84 | 27.67 | -0.37 | 1.3 | 1.0E-04 |  | EMX2       | 17.41 | 23.13  | 0.41 | 1.3 | 1.1E-02 |
| SRPK1          | 25.20 | 19.46 | -0.37 | 1.3 | 5.0E-05 |  | CDH13      | 9.64  | 12.80  | 0.41 | 1.3 | 5.0E-05 |
| CHST12         | 4.44  | 3.43  | -0.37 | 1.3 | 2.0E-04 |  | ERO1L      | 66.47 | 88.22  | 0.41 | 1.3 | 5.0E-05 |
| AVPI1          | 25.19 | 19.47 | -0.37 | 1.3 | 5.0E-05 |  | CDK16      | 30.37 | 40.30  | 0.41 | 1.3 | 5.0E-05 |
| PLXNA2         | 2.12  | 1.64  | -0.37 | 1.3 | 5.0E-05 |  | OLFM4      | 0.72  | 0.95   | 0.41 | 1.3 | 1.1E-02 |
| PRKXP1         | 0.95  | 0.73  | -0.37 | 1.3 | 5.0E-05 |  | RAB13      | 97.32 | 129.12 | 0.41 | 1.3 | 5.0E-05 |
| CA5BP1         | 10.61 | 8.21  | -0.37 | 1.3 | 5.0E-05 |  | PCTP       | 9.92  | 13.16  | 0.41 | 1.3 | 5.0E-05 |
| CCRN4L         | 4.46  | 3.45  | -0.37 | 1.3 | 5.0E-05 |  | CDCA7      | 3.36  | 4.45   | 0.41 | 1.3 | 5.0E-05 |
| SNHG11,SNORA39 | 18.68 | 14.46 | -0.37 | 1.3 | 3.7E-03 |  | PLK1       | 11.04 | 14.64  | 0.41 | 1.3 | 5.0E-05 |
| PBX1           | 3.46  | 2.68  | -0.37 | 1.3 | 5.0E-05 |  | CRNDE      | 9.49  | 12.58  | 0.41 | 1.3 | 1.0E-04 |
| SPATS2L        | 28.22 | 21.85 | -0.37 | 1.3 | 5.0E-05 |  | ERVMER34-1 | 3.38  | 4.49   | 0.41 | 1.3 | 5.0E-05 |
| XPO4           | 7.32  | 5.67  | -0.37 | 1.3 | 5.0E-05 |  | S100A9     | 87.66 | 116.16 | 0.41 | 1.3 | 5.0E-05 |
| FAM174B        | 17.93 | 13.89 | -0.37 | 1.3 | 5.0E-05 |  | PRKAA2     | 3.70  | 4.90   | 0.41 | 1.3 | 5.0E-05 |
| FZD8           | 2.02  | 1.57  | -0.37 | 1.3 | 4.1E-03 |  | SESN3      | 2.33  | 3.08   | 0.41 | 1.3 | 5.0E-05 |
| KCTD17         | 7.69  | 5.96  | -0.37 | 1.3 | 5.0E-05 |  | ZNF558     | 4.93  | 6.53   | 0.41 | 1.3 | 5.0E-05 |
| SIRT1          | 7.83  | 6.07  | -0.37 | 1.3 | 5.0E-05 |  | ZNF12      | 6.88  | 9.11   | 0.41 | 1.3 | 5.0E-05 |
| CYP1A1         | 1.84  | 1.43  | -0.37 | 1.3 | 2.7E-03 |  | WDR72      | 0.82  | 1.09   | 0.40 | 1.3 | 5.0E-05 |

|                                     |        |        |       |            |         |                             |        |        |      |            |         |
|-------------------------------------|--------|--------|-------|------------|---------|-----------------------------|--------|--------|------|------------|---------|
| SCNM1,TNFAIP8L2,<br>TNFAIP8L2-SCNM1 | 9.07   | 7.04   | -0.37 | <b>1.3</b> | 5.0E-05 | ZBTB16                      | 1.77   | 2.34   | 0.40 | <b>1.3</b> | 3.1E-03 |
| FLOT1                               | 25.88  | 20.09  | -0.37 | <b>1.3</b> | 5.0E-05 | SLC26A2                     | 49.04  | 64.91  | 0.40 | <b>1.3</b> | 5.0E-05 |
| SOLH                                | 10.77  | 8.37   | -0.36 | <b>1.3</b> | 5.3E-03 | ZNF229                      | 2.25   | 2.98   | 0.40 | <b>1.3</b> | 5.0E-05 |
| BLZF1                               | 22.12  | 17.18  | -0.36 | <b>1.3</b> | 1.0E-04 | KIAA1211                    | 0.62   | 0.82   | 0.40 | <b>1.3</b> | 4.0E-04 |
| EML3,MTA2                           | 50.13  | 38.94  | -0.36 | <b>1.3</b> | 5.0E-05 | CHST3                       | 12.56  | 16.61  | 0.40 | <b>1.3</b> | 5.0E-05 |
| C12orf5                             | 3.83   | 2.98   | -0.36 | <b>1.3</b> | 5.0E-05 | BOLA1                       | 5.42   | 7.17   | 0.40 | <b>1.3</b> | 1.7E-03 |
| RPS6KA5                             | 2.64   | 2.05   | -0.36 | <b>1.3</b> | 5.0E-05 | PEX11A                      | 1.24   | 1.64   | 0.40 | <b>1.3</b> | 1.8E-03 |
| HNF1A                               | 3.14   | 2.44   | -0.36 | <b>1.3</b> | 5.0E-05 | PELI1                       | 13.97  | 18.46  | 0.40 | <b>1.3</b> | 5.0E-05 |
| PJA2                                | 37.93  | 29.47  | -0.36 | <b>1.3</b> | 5.0E-05 | FBRSL1                      | 6.49   | 8.57   | 0.40 | <b>1.3</b> | 5.0E-05 |
| CLDN4                               | 157.39 | 122.31 | -0.36 | <b>1.3</b> | 5.0E-05 | PLXNA1                      | 13.50  | 17.82  | 0.40 | <b>1.3</b> | 5.0E-05 |
| FARSA                               | 45.05  | 35.02  | -0.36 | <b>1.3</b> | 5.0E-05 | SMYD5                       | 8.83   | 11.65  | 0.40 | <b>1.3</b> | 5.0E-05 |
| DENND5B                             | 4.94   | 3.84   | -0.36 | <b>1.3</b> | 5.0E-05 | SUSD3                       | 3.26   | 4.30   | 0.40 | <b>1.3</b> | 3.3E-03 |
| HIC2                                | 1.03   | 0.80   | -0.36 | <b>1.3</b> | 4.0E-04 | EIF4B                       | 112.23 | 148.04 | 0.40 | <b>1.3</b> | 5.0E-05 |
| STYK1                               | 1.28   | 0.99   | -0.36 | <b>1.3</b> | 8.4E-03 | MOCOS                       | 7.16   | 9.44   | 0.40 | <b>1.3</b> | 5.0E-05 |
| KCTD3                               | 30.41  | 23.66  | -0.36 | <b>1.3</b> | 5.0E-05 | FAM127C                     | 3.12   | 4.11   | 0.40 | <b>1.3</b> | 5.0E-05 |
| NFKBIZ,NXPE3                        | 130.79 | 101.75 | -0.36 | <b>1.3</b> | 5.0E-05 | ZNF823                      | 3.94   | 5.19   | 0.40 | <b>1.3</b> | 5.0E-05 |
| ARAF                                | 27.41  | 21.33  | -0.36 | <b>1.3</b> | 8.1E-03 | FAM173B                     | 3.79   | 4.99   | 0.40 | <b>1.3</b> | 1.2E-02 |
| CASP1                               | 13.40  | 10.43  | -0.36 | <b>1.3</b> | 2.0E-04 | CEP152                      | 1.23   | 1.62   | 0.40 | <b>1.3</b> | 5.0E-05 |
| SNAI1                               | 4.47   | 3.48   | -0.36 | <b>1.3</b> | 3.5E-04 | TSPYL5                      | 5.26   | 6.92   | 0.40 | <b>1.3</b> | 5.0E-05 |
| CAMKMT                              | 4.26   | 3.32   | -0.36 | <b>1.3</b> | 1.3E-03 | ALOX12                      | 2.58   | 3.40   | 0.40 | <b>1.3</b> | 5.0E-05 |
| GABRE                               | 13.69  | 10.66  | -0.36 | <b>1.3</b> | 1.5E-04 | PPL                         | 15.17  | 19.97  | 0.40 | <b>1.3</b> | 4.0E-04 |
| CA12                                | 125.57 | 97.83  | -0.36 | <b>1.3</b> | 5.0E-05 | INHBB                       | 0.93   | 1.22   | 0.40 | <b>1.3</b> | 7.1E-03 |
| RAC3                                | 14.00  | 10.91  | -0.36 | <b>1.3</b> | 5.0E-05 | BRIP1                       | 0.98   | 1.29   | 0.40 | <b>1.3</b> | 5.0E-05 |
| SLC40A1                             | 3.30   | 2.57   | -0.36 | <b>1.3</b> | 5.0E-05 | FLNC                        | 1.70   | 2.24   | 0.40 | <b>1.3</b> | 5.0E-05 |
| DNAJB2                              | 19.32  | 15.06  | -0.36 | <b>1.3</b> | 5.0E-05 | ALDH4A1                     | 8.21   | 10.79  | 0.39 | <b>1.3</b> | 5.0E-05 |
| CCNO                                | 6.34   | 4.95   | -0.36 | <b>1.3</b> | 6.5E-04 | XPC                         | 18.24  | 23.97  | 0.39 | <b>1.3</b> | 5.0E-05 |
| POGLUT1                             | 8.85   | 6.90   | -0.36 | <b>1.3</b> | 5.0E-05 | FPGT,FPGT-<br>TNNI3K,TNNI3K | 2.57   | 3.38   | 0.39 | <b>1.3</b> | 5.0E-05 |
| CCNY                                | 17.58  | 13.71  | -0.36 | <b>1.3</b> | 1.0E-04 | ZNF385A                     | 6.98   | 9.17   | 0.39 | <b>1.3</b> | 5.0E-05 |
| TWF2                                | 60.31  | 47.05  | -0.36 | <b>1.3</b> | 5.0E-05 | MGC2752                     | 6.79   | 8.92   | 0.39 | <b>1.3</b> | 5.0E-05 |
| AGAP3                               | 12.31  | 9.60   | -0.36 | <b>1.3</b> | 5.0E-05 | VSTM2L                      | 15.37  | 20.19  | 0.39 | <b>1.3</b> | 5.0E-05 |
| FNDC3A                              | 38.08  | 29.72  | -0.36 | <b>1.3</b> | 1.0E-04 | ANXA6                       | 32.25  | 42.35  | 0.39 | <b>1.3</b> | 5.0E-05 |
| MED27                               | 15.05  | 11.74  | -0.36 | <b>1.3</b> | 5.0E-05 | LOC100506990                | 4.91   | 6.45   | 0.39 | <b>1.3</b> | 5.0E-05 |
| NEU1                                | 76.41  | 59.67  | -0.36 | <b>1.3</b> | 5.0E-05 | PSMC3                       | 44.59  | 58.54  | 0.39 | <b>1.3</b> | 5.0E-05 |
| LIMD1-AS1                           | 4.69   | 3.66   | -0.36 | <b>1.3</b> | 2.9E-03 | SIM1                        | 3.99   | 5.23   | 0.39 | <b>1.3</b> | 5.0E-05 |
| KIFC3                               | 59.85  | 46.78  | -0.36 | <b>1.3</b> | 2.0E-04 | VIPR1                       | 12.33  | 16.18  | 0.39 | <b>1.3</b> | 5.0E-05 |
| UBALD2                              | 24.09  | 18.83  | -0.36 | <b>1.3</b> | 5.0E-05 | SCIN                        | 19.83  | 26.01  | 0.39 | <b>1.3</b> | 5.0E-05 |

|               |        |        |       |     |         |  |          |         |         |      |     |         |
|---------------|--------|--------|-------|-----|---------|--|----------|---------|---------|------|-----|---------|
| WBP5          | 69.03  | 53.95  | -0.36 | 1.3 | 1.0E-04 |  | NEBL     | 4.36    | 5.72    | 0.39 | 1.3 | 5.0E-05 |
| EMP3          | 96.91  | 75.75  | -0.36 | 1.3 | 5.0E-05 |  | ZNF808   | 1.98    | 2.59    | 0.39 | 1.3 | 5.0E-05 |
| TDRD9         | 1.16   | 0.90   | -0.36 | 1.3 | 2.5E-03 |  | FAM35A   | 7.12    | 9.33    | 0.39 | 1.3 | 5.0E-05 |
| TMEM38B       | 3.12   | 2.44   | -0.36 | 1.3 | 5.0E-05 |  | TBC1D10B | 12.16   | 15.94   | 0.39 | 1.3 | 5.0E-05 |
| CYB5R2        | 10.61  | 8.30   | -0.36 | 1.3 | 5.0E-05 |  | SVIL     | 43.74   | 57.30   | 0.39 | 1.3 | 5.0E-05 |
| ENPP1         | 0.69   | 0.54   | -0.35 | 1.3 | 2.1E-03 |  | AURKA    | 7.79    | 10.20   | 0.39 | 1.3 | 5.0E-05 |
| GJA9,MYCBP    | 10.00  | 7.82   | -0.35 | 1.3 | 5.0E-05 |  | ZADH2    | 4.82    | 6.32    | 0.39 | 1.3 | 5.0E-05 |
| CSNK2A1       | 54.60  | 42.71  | -0.35 | 1.3 | 1.5E-04 |  | EVA1A    | 17.06   | 22.31   | 0.39 | 1.3 | 5.0E-05 |
| FZD5          | 11.68  | 9.14   | -0.35 | 1.3 | 1.0E-04 |  | XRCC4    | 4.28    | 5.60    | 0.39 | 1.3 | 5.5E-04 |
| DYRK3         | 3.72   | 2.91   | -0.35 | 1.3 | 1.1E-03 |  | CNTNAP2  | 0.94    | 1.22    | 0.39 | 1.3 | 5.0E-05 |
| CEBPA         | 2.78   | 2.18   | -0.35 | 1.3 | 2.5E-03 |  | DENND5A  | 17.38   | 22.72   | 0.39 | 1.3 | 5.0E-05 |
| C11orf80,RCE1 | 18.14  | 14.20  | -0.35 | 1.3 | 2.0E-04 |  | COL25A1  | 1.89    | 2.46    | 0.39 | 1.3 | 1.0E-04 |
| DCLRE1C       | 5.01   | 3.93   | -0.35 | 1.3 | 1.3E-03 |  | RABL6    | 26.35   | 34.42   | 0.39 | 1.3 | 5.0E-05 |
| SLC16A3       | 131.37 | 102.87 | -0.35 | 1.3 | 5.0E-05 |  | TRIM55   | 2.58    | 3.38    | 0.39 | 1.3 | 5.0E-05 |
| RTKN          | 25.36  | 19.86  | -0.35 | 1.3 | 1.4E-03 |  | SMIM4    | 26.74   | 34.93   | 0.39 | 1.3 | 2.5E-04 |
| MVB12A        | 29.26  | 22.91  | -0.35 | 1.3 | 5.0E-05 |  | TOP2B    | 27.20   | 35.53   | 0.39 | 1.3 | 5.0E-05 |
| TSEN54        | 6.94   | 5.43   | -0.35 | 1.3 | 5.0E-05 |  | FAM3C    | 134.60  | 175.78  | 0.39 | 1.3 | 5.0E-05 |
| GDA           | 108.42 | 84.93  | -0.35 | 1.3 | 5.0E-05 |  | FAM111A  | 10.02   | 13.09   | 0.38 | 1.3 | 5.0E-05 |
| MON1A         | 2.93   | 2.30   | -0.35 | 1.3 | 4.8E-03 |  | MRFAP1   | 100.82  | 131.64  | 0.38 | 1.3 | 5.0E-05 |
| GOLGA7        | 27.91  | 21.87  | -0.35 | 1.3 | 5.0E-05 |  | MIR600HG | 0.77    | 1.00    | 0.38 | 1.3 | 2.5E-04 |
| UBA5          | 19.07  | 14.94  | -0.35 | 1.3 | 9.9E-03 |  | TGFA     | 20.08   | 26.21   | 0.38 | 1.3 | 5.0E-05 |
| FGA           | 26.34  | 20.63  | -0.35 | 1.3 | 5.0E-05 |  | ZNF91    | 2.77    | 3.62    | 0.38 | 1.3 | 5.0E-05 |
| CLCN4         | 4.32   | 3.38   | -0.35 | 1.3 | 5.0E-05 |  | GALNT11  | 8.77    | 11.44   | 0.38 | 1.3 | 5.0E-05 |
| USP9Y         | 9.12   | 7.15   | -0.35 | 1.3 | 5.0E-05 |  | C11orf74 | 6.61    | 8.62    | 0.38 | 1.3 | 1.7E-03 |
| TBL1XR1       | 26.66  | 20.89  | -0.35 | 1.3 | 1.5E-04 |  | ACTB     | 1165.12 | 1519.29 | 0.38 | 1.3 | 5.0E-05 |
| PPM1J         | 2.82   | 2.21   | -0.35 | 1.3 | 7.3E-03 |  | ZWILCH   | 3.39    | 4.42    | 0.38 | 1.3 | 5.0E-05 |
| NEO1          | 8.41   | 6.59   | -0.35 | 1.3 | 5.0E-05 |  | FXR1     | 12.38   | 16.14   | 0.38 | 1.3 | 5.0E-05 |
| NCKAP5L       | 9.37   | 7.35   | -0.35 | 1.3 | 5.0E-05 |  | TPTEP1   | 3.87    | 5.05    | 0.38 | 1.3 | 7.1E-03 |
| PRAF2         | 16.45  | 12.90  | -0.35 | 1.3 | 5.0E-05 |  | TLCD2    | 2.66    | 3.47    | 0.38 | 1.3 | 5.0E-05 |
| APOL6         | 26.83  | 21.04  | -0.35 | 1.3 | 1.0E-04 |  | ZNF354A  | 4.58    | 5.96    | 0.38 | 1.3 | 5.0E-05 |
| SETDB2        | 4.38   | 3.43   | -0.35 | 1.3 | 5.0E-05 |  | ZNF542   | 5.06    | 6.60    | 0.38 | 1.3 | 5.0E-05 |
| PEX11B        | 17.38  | 13.63  | -0.35 | 1.3 | 5.0E-05 |  | LETM2    | 4.25    | 5.54    | 0.38 | 1.3 | 5.0E-05 |
| SERPINE1      | 194.71 | 152.80 | -0.35 | 1.3 | 5.0E-05 |  | G0S2     | 27.57   | 35.90   | 0.38 | 1.3 | 5.0E-05 |
| LPHN2         | 14.52  | 11.40  | -0.35 | 1.3 | 1.0E-04 |  | KLF8     | 2.12    | 2.76    | 0.38 | 1.3 | 5.0E-05 |
| GAS2L1        | 7.02   | 5.51   | -0.35 | 1.3 | 5.0E-05 |  | AFAP1L2  | 4.96    | 6.46    | 0.38 | 1.3 | 5.0E-05 |
| RAB3IP        | 4.45   | 3.49   | -0.35 | 1.3 | 5.0E-05 |  | COL5A2   | 0.48    | 0.62    | 0.38 | 1.3 | 2.5E-03 |
| TRIM46        | 3.55   | 2.79   | -0.35 | 1.3 | 3.5E-04 |  | SLC34A2  | 92.49   | 120.30  | 0.38 | 1.3 | 5.0E-05 |
| UBE2M         | 45.66  | 35.88  | -0.35 | 1.3 | 5.0E-05 |  | MKL2     | 8.71    | 11.31   | 0.38 | 1.3 | 5.0E-05 |

|              |        |        |       |     |         |  |          |        |        |      |     |         |
|--------------|--------|--------|-------|-----|---------|--|----------|--------|--------|------|-----|---------|
| TRMT61A      | 5.13   | 4.03   | -0.35 | 1.3 | 5.0E-05 |  | MEIS3P1  | 6.92   | 8.99   | 0.38 | 1.3 | 5.0E-05 |
| NLGN2        | 11.80  | 9.28   | -0.35 | 1.3 | 5.0E-05 |  | CD24     | 593.43 | 770.44 | 0.38 | 1.3 | 5.0E-05 |
| IL1B         | 24.29  | 19.10  | -0.35 | 1.3 | 5.0E-05 |  | BHLHE40  | 25.87  | 33.58  | 0.38 | 1.3 | 5.0E-05 |
| MAP2         | 3.40   | 2.67   | -0.35 | 1.3 | 5.0E-05 |  | MIR30C2  | 10.34  | 13.42  | 0.38 | 1.3 | 1.5E-04 |
| NECAB3       | 6.90   | 5.43   | -0.35 | 1.3 | 3.0E-04 |  | KITLG    | 2.97   | 3.85   | 0.37 | 1.3 | 5.0E-05 |
| ZNF853       | 3.79   | 2.99   | -0.35 | 1.3 | 5.0E-05 |  | NLN      | 4.87   | 6.32   | 0.37 | 1.3 | 5.0E-05 |
| RNF126       | 19.82  | 15.61  | -0.35 | 1.3 | 5.0E-05 |  | C19orf33 | 157.30 | 203.93 | 0.37 | 1.3 | 9.0E-04 |
| LPPR2        | 8.95   | 7.05   | -0.34 | 1.3 | 5.0E-05 |  | GSTM1    | 3.53   | 4.58   | 0.37 | 1.3 | 2.4E-03 |
| SHC3         | 2.08   | 1.64   | -0.34 | 1.3 | 3.0E-04 |  | ESCO2    | 0.81   | 1.05   | 0.37 | 1.3 | 7.7E-03 |
| SLPI         | 659.22 | 519.05 | -0.34 | 1.3 | 5.0E-05 |  | ZNF202   | 2.85   | 3.69   | 0.37 | 1.3 | 5.0E-05 |
| SLC10A7      | 5.12   | 4.03   | -0.34 | 1.3 | 5.0E-05 |  | RBM3     | 94.20  | 121.98 | 0.37 | 1.3 | 5.0E-05 |
| NCKAP5       | 1.00   | 0.79   | -0.34 | 1.3 | 5.0E-03 |  | HMGB3    | 11.06  | 14.32  | 0.37 | 1.3 | 5.0E-05 |
| TNKS         | 11.19  | 8.81   | -0.34 | 1.3 | 1.0E-04 |  | CREBL2   | 8.98   | 11.62  | 0.37 | 1.3 | 5.0E-05 |
| C11orf68     | 11.17  | 8.79   | -0.34 | 1.3 | 5.0E-05 |  | TSPAN9   | 15.50  | 20.06  | 0.37 | 1.3 | 5.0E-05 |
| PRKCA        | 18.22  | 14.35  | -0.34 | 1.3 | 5.0E-05 |  | PLOD2    | 56.65  | 73.31  | 0.37 | 1.3 | 5.0E-05 |
| ELK1         | 15.82  | 12.46  | -0.34 | 1.3 | 5.0E-05 |  | ZMAT1    | 1.40   | 1.82   | 0.37 | 1.3 | 5.0E-05 |
| MLKL         | 8.87   | 6.99   | -0.34 | 1.3 | 5.0E-05 |  | C4orf52  | 17.86  | 23.10  | 0.37 | 1.3 | 5.0E-05 |
| FUT6         | 3.57   | 2.81   | -0.34 | 1.3 | 6.0E-04 |  | TMEM48   | 7.45   | 9.64   | 0.37 | 1.3 | 5.0E-05 |
| MOGS         | 39.69  | 31.28  | -0.34 | 1.3 | 1.1E-03 |  | COPZ2    | 6.11   | 7.90   | 0.37 | 1.3 | 1.1E-03 |
| C9orf91      | 8.05   | 6.34   | -0.34 | 1.3 | 5.0E-05 |  | CKS1B    | 36.05  | 46.62  | 0.37 | 1.3 | 5.0E-05 |
| CCDC59       | 13.18  | 10.39  | -0.34 | 1.3 | 5.0E-05 |  | TCEA2    | 10.93  | 14.13  | 0.37 | 1.3 | 5.0E-05 |
| SLC25A44     | 11.41  | 8.99   | -0.34 | 1.3 | 5.0E-05 |  | MTHFSD   | 6.34   | 8.20   | 0.37 | 1.3 | 3.2E-03 |
| RNASSET2     | 201.18 | 158.66 | -0.34 | 1.3 | 5.0E-05 |  | XRCC2    | 1.12   | 1.44   | 0.37 | 1.3 | 3.1E-03 |
| MB21D2       | 4.58   | 3.62   | -0.34 | 1.3 | 5.0E-05 |  | HIRIP3   | 2.46   | 3.18   | 0.37 | 1.3 | 1.0E-04 |
| FBXL15       | 3.01   | 2.37   | -0.34 | 1.3 | 4.5E-03 |  | FARS2    | 3.87   | 5.00   | 0.37 | 1.3 | 1.0E-04 |
| DAAM2        | 2.33   | 1.84   | -0.34 | 1.3 | 1.4E-03 |  | LRRC23   | 4.40   | 5.69   | 0.37 | 1.3 | 3.5E-04 |
| TTC29        | 4.59   | 3.62   | -0.34 | 1.3 | 3.0E-04 |  | RPA3     | 5.86   | 7.56   | 0.37 | 1.3 | 1.0E-03 |
| FGF12        | 0.82   | 0.65   | -0.34 | 1.3 | 2.4E-03 |  | ANKRD2   | 3.49   | 4.50   | 0.37 | 1.3 | 8.4E-03 |
| SEMA3F       | 20.04  | 15.82  | -0.34 | 1.3 | 1.0E-04 |  | CDK6     | 15.70  | 20.27  | 0.37 | 1.3 | 5.0E-05 |
| PKD1P1       | 19.88  | 15.69  | -0.34 | 1.3 | 2.7E-03 |  | CADM4    | 4.36   | 5.63   | 0.37 | 1.3 | 5.0E-05 |
| LOC100294145 | 5.92   | 4.68   | -0.34 | 1.3 | 5.0E-05 |  | GPRIN2   | 4.60   | 5.94   | 0.37 | 1.3 | 2.5E-04 |
| RND3         | 74.84  | 59.08  | -0.34 | 1.3 | 1.0E-04 |  | WSB1     | 110.21 | 142.21 | 0.37 | 1.3 | 2.5E-04 |
| NUB1         | 44.60  | 35.22  | -0.34 | 1.3 | 2.5E-04 |  | RNF165   | 3.37   | 4.35   | 0.37 | 1.3 | 5.0E-05 |
| ATP6V0B      | 101.08 | 79.85  | -0.34 | 1.3 | 5.0E-05 |  | PERP     | 31.11  | 40.13  | 0.37 | 1.3 | 5.0E-05 |
| ATG16L1      | 18.44  | 14.57  | -0.34 | 1.3 | 1.0E-04 |  | TMCO3    | 40.12  | 51.72  | 0.37 | 1.3 | 5.0E-05 |
| DRG1         | 33.17  | 26.20  | -0.34 | 1.3 | 1.0E-04 |  | KHNYN    | 15.32  | 19.75  | 0.37 | 1.3 | 2.5E-04 |
| PARD6B       | 8.65   | 6.84   | -0.34 | 1.3 | 5.0E-05 |  | TNFRSF21 | 17.23  | 22.21  | 0.37 | 1.3 | 5.0E-05 |
| CNNM3        | 5.55   | 4.39   | -0.34 | 1.3 | 5.0E-05 |  | PDE9A    | 7.11   | 9.17   | 0.37 | 1.3 | 5.0E-05 |

|           |        |        |       |     |         |                   |        |        |      |     |         |
|-----------|--------|--------|-------|-----|---------|-------------------|--------|--------|------|-----|---------|
| TRUB1     | 15.00  | 11.86  | -0.34 | 1.3 | 5.0E-05 | ECE1              | 72.01  | 92.79  | 0.37 | 1.3 | 5.0E-05 |
| HTT       | 10.12  | 8.00   | -0.34 | 1.3 | 5.0E-05 | PPP1R3C           | 1.97   | 2.53   | 0.37 | 1.3 | 3.5E-04 |
| ABHD3     | 12.19  | 9.64   | -0.34 | 1.3 | 5.0E-05 | KIF22             | 9.37   | 12.06  | 0.37 | 1.3 | 5.0E-05 |
| IDO1      | 12.07  | 9.55   | -0.34 | 1.3 | 5.0E-05 | SPINK13           | 10.93  | 14.08  | 0.36 | 1.3 | 2.2E-03 |
| WDFY3     | 11.46  | 9.07   | -0.34 | 1.3 | 5.0E-05 | SMC1A             | 6.48   | 8.34   | 0.36 | 1.3 | 5.0E-05 |
| SELK      | 60.31  | 47.74  | -0.34 | 1.3 | 8.5E-04 | RCAN3             | 7.45   | 9.59   | 0.36 | 1.3 | 5.0E-05 |
| DHDDS     | 14.80  | 11.72  | -0.34 | 1.3 | 1.5E-04 | HOMER2            | 11.33  | 14.58  | 0.36 | 1.3 | 5.0E-05 |
| NCDN      | 8.79   | 6.96   | -0.34 | 1.3 | 5.0E-05 | ZNF347            | 1.78   | 2.29   | 0.36 | 1.3 | 5.0E-05 |
| SAMD1     | 6.69   | 5.29   | -0.34 | 1.3 | 3.7E-03 | ATAD2             | 2.66   | 3.43   | 0.36 | 1.3 | 5.0E-05 |
| DNAJC6    | 3.95   | 3.13   | -0.34 | 1.3 | 5.0E-05 | ZC3H6             | 1.98   | 2.55   | 0.36 | 1.3 | 5.0E-05 |
| BICC1     | 92.92  | 73.60  | -0.34 | 1.3 | 5.0E-05 | E2F7              | 1.71   | 2.19   | 0.36 | 1.3 | 5.0E-05 |
| ECE2      | 8.89   | 7.04   | -0.34 | 1.3 | 1.3E-03 | FGFRL1            | 13.67  | 17.56  | 0.36 | 1.3 | 5.0E-05 |
| CCDC149   | 10.48  | 8.30   | -0.34 | 1.3 | 5.0E-05 | C9orf123          | 8.30   | 10.66  | 0.36 | 1.3 | 5.0E-05 |
| ABHD8     | 7.47   | 5.92   | -0.34 | 1.3 | 5.0E-05 | ZNF284            | 1.61   | 2.07   | 0.36 | 1.3 | 1.7E-03 |
| TBC1D19   | 6.95   | 5.51   | -0.34 | 1.3 | 5.0E-05 | DLGAP1,DLGAP1-AS1 | 3.78   | 4.85   | 0.36 | 1.3 | 8.6E-03 |
| RNF2      | 7.33   | 5.81   | -0.34 | 1.3 | 5.0E-05 | AES               | 72.20  | 92.71  | 0.36 | 1.3 | 5.0E-05 |
| BCL9      | 7.30   | 5.78   | -0.34 | 1.3 | 5.0E-05 | PREPL             | 9.69   | 12.44  | 0.36 | 1.3 | 5.0E-05 |
| PROSAPIP1 | 12.75  | 10.11  | -0.34 | 1.3 | 5.0E-05 | TAF3              | 1.92   | 2.46   | 0.36 | 1.3 | 2.5E-04 |
| ARFGEF2   | 23.31  | 18.48  | -0.34 | 1.3 | 5.0E-05 | ZNF28             | 3.39   | 4.35   | 0.36 | 1.3 | 5.0E-05 |
| RDX       | 23.20  | 18.39  | -0.33 | 1.3 | 1.5E-04 | OGFR              | 16.22  | 20.81  | 0.36 | 1.3 | 5.0E-05 |
| CYSTM1    | 145.53 | 115.40 | -0.33 | 1.3 | 1.0E-04 | ZNF528            | 7.29   | 9.35   | 0.36 | 1.3 | 1.6E-03 |
| GPRC5C    | 133.71 | 106.04 | -0.33 | 1.3 | 1.0E-04 | CDH2              | 31.62  | 40.58  | 0.36 | 1.3 | 5.0E-05 |
| C12orf57  | 87.04  | 69.04  | -0.33 | 1.3 | 5.0E-05 | ATRX              | 13.16  | 16.89  | 0.36 | 1.3 | 5.0E-05 |
| WDR60     | 13.31  | 10.56  | -0.33 | 1.3 | 5.0E-05 | ZNF549            | 2.29   | 2.93   | 0.36 | 1.3 | 5.0E-05 |
| PYGO1     | 3.94   | 3.12   | -0.33 | 1.3 | 2.6E-03 | CABLES2           | 2.76   | 3.54   | 0.36 | 1.3 | 5.0E-05 |
| SLC35D1   | 4.97   | 3.94   | -0.33 | 1.3 | 5.0E-05 | CMTM8             | 3.86   | 4.95   | 0.36 | 1.3 | 4.4E-03 |
| GADD45A   | 49.30  | 39.12  | -0.33 | 1.3 | 5.0E-05 | PLIN2             | 15.95  | 20.46  | 0.36 | 1.3 | 5.0E-05 |
| ATAD2B    | 3.21   | 2.55   | -0.33 | 1.3 | 5.0E-05 | EIF3L             | 122.93 | 157.59 | 0.36 | 1.3 | 5.0E-05 |
| GNRHR2    | 7.54   | 5.98   | -0.33 | 1.3 | 6.5E-03 | TAGLN2            | 221.97 | 284.52 | 0.36 | 1.3 | 5.0E-05 |
| GNAI1     | 32.64  | 25.91  | -0.33 | 1.3 | 5.0E-05 | ZNF84             | 4.96   | 6.35   | 0.36 | 1.3 | 5.0E-05 |
| TRO       | 2.15   | 1.71   | -0.33 | 1.3 | 1.0E-02 | TGFBI             | 149.26 | 191.16 | 0.36 | 1.3 | 5.0E-05 |
| PIP4K2A   | 28.77  | 22.85  | -0.33 | 1.3 | 5.0E-05 | TAF15             | 46.27  | 59.24  | 0.36 | 1.3 | 5.0E-05 |
| PIGH      | 11.00  | 8.74   | -0.33 | 1.3 | 2.0E-04 | LYRM1             | 17.20  | 22.01  | 0.36 | 1.3 | 3.2E-03 |
| DEAF1     | 13.73  | 10.91  | -0.33 | 1.3 | 7.1E-03 | ACTR1B            | 17.44  | 22.32  | 0.36 | 1.3 | 5.0E-05 |
| COX19     | 3.37   | 2.68   | -0.33 | 1.3 | 5.0E-05 | ESRG              | 8.00   | 10.23  | 0.36 | 1.3 | 5.0E-05 |
| POLA1     | 1.89   | 1.50   | -0.33 | 1.3 | 5.0E-05 | ABCB7             | 9.83   | 12.57  | 0.36 | 1.3 | 5.0E-05 |
| TAF1A     | 2.76   | 2.19   | -0.33 | 1.3 | 1.0E-02 | KLHDC3            | 19.26  | 24.64  | 0.36 | 1.3 | 5.0E-05 |

|          |       |       |       |     |         |                         |        |        |      |     |         |
|----------|-------|-------|-------|-----|---------|-------------------------|--------|--------|------|-----|---------|
| IRX3     | 5.49  | 4.36  | -0.33 | 1.3 | 1.5E-04 | DUT                     | 11.00  | 14.07  | 0.35 | 1.3 | 5.0E-05 |
| ASPHD2   | 2.75  | 2.18  | -0.33 | 1.3 | 3.0E-04 | ZNF624                  | 1.29   | 1.65   | 0.35 | 1.3 | 1.5E-04 |
| NPHP4    | 3.14  | 2.50  | -0.33 | 1.3 | 5.0E-05 | ATAD5                   | 0.86   | 1.10   | 0.35 | 1.3 | 6.5E-04 |
| ADAT2    | 3.35  | 2.66  | -0.33 | 1.3 | 5.0E-05 | AHNAK2                  | 2.58   | 3.30   | 0.35 | 1.3 | 5.0E-05 |
| SCLT1    | 3.70  | 2.94  | -0.33 | 1.3 | 5.0E-05 | SLC41A3                 | 9.41   | 12.02  | 0.35 | 1.3 | 5.0E-05 |
| F2RL1    | 49.99 | 39.77 | -0.33 | 1.3 | 5.0E-05 | PAFAH1B2                | 27.42  | 35.03  | 0.35 | 1.3 | 1.0E-04 |
| MAP3K8   | 12.74 | 10.13 | -0.33 | 1.3 | 5.0E-05 | NUDCD3                  | 12.19  | 15.57  | 0.35 | 1.3 | 3.5E-04 |
| MAP4K2   | 4.93  | 3.92  | -0.33 | 1.3 | 5.0E-05 | IL17RD                  | 2.03   | 2.59   | 0.35 | 1.3 | 5.0E-05 |
| GRAMD3   | 21.17 | 16.84 | -0.33 | 1.3 | 1.5E-04 | ALG14                   | 6.63   | 8.46   | 0.35 | 1.3 | 2.0E-04 |
| FLJ43681 | 3.37  | 2.68  | -0.33 | 1.3 | 8.0E-04 | RBM15B                  | 12.58  | 16.07  | 0.35 | 1.3 | 5.0E-04 |
| PDZD2    | 6.34  | 5.04  | -0.33 | 1.3 | 5.0E-05 | THSD7A                  | 2.17   | 2.77   | 0.35 | 1.3 | 5.0E-05 |
| VWA7     | 2.20  | 1.75  | -0.33 | 1.3 | 1.9E-03 | ZNF256                  | 2.25   | 2.87   | 0.35 | 1.3 | 1.3E-03 |
| C11orf48 | 38.50 | 30.66 | -0.33 | 1.3 | 3.5E-04 | C7orf50                 | 27.71  | 35.36  | 0.35 | 1.3 | 5.0E-05 |
| RPS6KA6  | 0.68  | 0.54  | -0.33 | 1.3 | 1.6E-03 | WBP4                    | 5.09   | 6.50   | 0.35 | 1.3 | 5.0E-05 |
| ZNF81    | 1.92  | 1.53  | -0.33 | 1.3 | 5.0E-05 | CXCL1                   | 417.71 | 532.95 | 0.35 | 1.3 | 5.0E-05 |
| STXBP4   | 3.07  | 2.45  | -0.33 | 1.3 | 5.0E-05 | IL1R2                   | 2.96   | 3.78   | 0.35 | 1.3 | 3.6E-03 |
| PTAR1    | 11.78 | 9.39  | -0.33 | 1.3 | 5.0E-05 | ZSCAN30                 | 3.90   | 4.98   | 0.35 | 1.3 | 9.1E-03 |
| QSOX1    | 83.51 | 66.55 | -0.33 | 1.3 | 5.0E-05 | SWI5                    | 12.39  | 15.81  | 0.35 | 1.3 | 5.0E-05 |
| SLC16A10 | 8.68  | 6.92  | -0.33 | 1.3 | 8.4E-03 | NAGA                    | 4.21   | 5.37   | 0.35 | 1.3 | 5.0E-05 |
| PSPH     | 45.98 | 36.66 | -0.33 | 1.3 | 1.5E-04 | MEMO1                   | 14.84  | 18.93  | 0.35 | 1.3 | 5.0E-05 |
| MLX      | 15.07 | 12.02 | -0.33 | 1.3 | 5.0E-05 | USP22                   | 53.82  | 68.63  | 0.35 | 1.3 | 5.0E-05 |
| APBB2    | 7.22  | 5.76  | -0.33 | 1.3 | 5.0E-05 | CLIP1                   | 26.72  | 34.06  | 0.35 | 1.3 | 5.0E-05 |
| CSRNP1   | 8.32  | 6.64  | -0.33 | 1.3 | 5.0E-05 | CFTR                    | 21.54  | 27.46  | 0.35 | 1.3 | 5.0E-05 |
| NAPEPLD  | 9.94  | 7.93  | -0.33 | 1.3 | 8.4E-03 | BRI3BP                  | 2.27   | 2.89   | 0.35 | 1.3 | 1.0E-04 |
| PYGL     | 68.31 | 54.55 | -0.32 | 1.3 | 5.0E-05 | ALG10B                  | 1.73   | 2.20   | 0.35 | 1.3 | 5.0E-05 |
| MAP9     | 6.55  | 5.23  | -0.32 | 1.3 | 1.5E-04 | APITD1,APITD1-CORT,CORT | 6.40   | 8.16   | 0.35 | 1.3 | 5.0E-05 |
| U2SURP   | 24.01 | 19.18 | -0.32 | 1.3 | 1.5E-03 | ZNF302                  | 6.91   | 8.80   | 0.35 | 1.3 | 5.0E-05 |
| ZSWIM8   | 14.16 | 11.31 | -0.32 | 1.3 | 1.2E-03 | FAM114A2                | 6.34   | 8.08   | 0.35 | 1.3 | 5.0E-05 |
| NSUN5    | 8.02  | 6.41  | -0.32 | 1.3 | 5.0E-05 | SLC9A8                  | 4.23   | 5.38   | 0.35 | 1.3 | 5.0E-05 |
| SEPT6    | 4.75  | 3.80  | -0.32 | 1.3 | 5.0E-05 | DOCK4                   | 5.11   | 6.51   | 0.35 | 1.3 | 5.0E-05 |
| HDAC5    | 1.34  | 1.07  | -0.32 | 1.3 | 1.9E-03 | EXO5                    | 2.00   | 2.55   | 0.35 | 1.3 | 2.3E-03 |
| GAS2L3   | 9.29  | 7.43  | -0.32 | 1.3 | 4.0E-04 | NUDT15                  | 11.47  | 14.60  | 0.35 | 1.3 | 5.0E-05 |
| N4BP3    | 1.45  | 1.16  | -0.32 | 1.3 | 3.0E-04 | UIMC1                   | 10.90  | 13.87  | 0.35 | 1.3 | 5.0E-05 |
| DEPDC5   | 3.24  | 2.59  | -0.32 | 1.3 | 5.0E-05 | CLDN1                   | 205.76 | 261.90 | 0.35 | 1.3 | 5.0E-05 |
| BDH2     | 12.59 | 10.06 | -0.32 | 1.3 | 5.0E-05 | ATP8B1                  | 7.61   | 9.68   | 0.35 | 1.3 | 1.0E-04 |
| PSMG3    | 23.51 | 18.80 | -0.32 | 1.3 | 1.0E-04 | HACL1                   | 8.92   | 11.35  | 0.35 | 1.3 | 5.0E-05 |
| PPAP2B   | 15.37 | 12.29 | -0.32 | 1.3 | 5.0E-05 | ZFP28                   | 1.80   | 2.29   | 0.35 | 1.3 | 2.0E-04 |

|          |       |       |       |     |         |                |       |       |      |     |         |
|----------|-------|-------|-------|-----|---------|----------------|-------|-------|------|-----|---------|
| DAGLA    | 2.98  | 2.38  | -0.32 | 1.3 | 5.0E-05 | EPHB1          | 3.33  | 4.23  | 0.35 | 1.3 | 5.0E-05 |
| GPRC5B   | 13.06 | 10.44 | -0.32 | 1.3 | 5.0E-05 | SPNS2          | 34.18 | 43.44 | 0.35 | 1.3 | 2.0E-04 |
| ZNFX1    | 43.70 | 34.95 | -0.32 | 1.3 | 5.0E-04 | DCP2           | 4.54  | 5.77  | 0.35 | 1.3 | 6.5E-04 |
| PARP10   | 26.37 | 21.10 | -0.32 | 1.3 | 5.0E-05 | ZNF337         | 5.18  | 6.59  | 0.35 | 1.3 | 3.7E-03 |
| HLA-DPB1 | 1.56  | 1.25  | -0.32 | 1.3 | 3.8E-03 | SMO            | 2.38  | 3.02  | 0.35 | 1.3 | 1.5E-04 |
|          |       |       |       |     |         | ANG,RNASE4     | 10.26 | 13.03 | 0.35 | 1.3 | 1.3E-03 |
|          |       |       |       |     |         | TRIM59         | 4.21  | 5.34  | 0.34 | 1.3 | 5.0E-05 |
|          |       |       |       |     |         | RBL1           | 0.82  | 1.04  | 0.34 | 1.3 | 3.8E-03 |
|          |       |       |       |     |         | DCUN1D3        | 5.22  | 6.62  | 0.34 | 1.3 | 1.1E-02 |
|          |       |       |       |     |         | CHST15         | 21.28 | 27.00 | 0.34 | 1.3 | 2.0E-04 |
|          |       |       |       |     |         | FRAT2          | 5.36  | 6.80  | 0.34 | 1.3 | 5.0E-05 |
|          |       |       |       |     |         | KIAA1522       | 37.89 | 48.04 | 0.34 | 1.3 | 1.1E-02 |
|          |       |       |       |     |         | ZNF503-AS2     | 2.06  | 2.61  | 0.34 | 1.3 | 1.1E-02 |
|          |       |       |       |     |         | SDK1           | 6.41  | 8.13  | 0.34 | 1.3 | 2.5E-04 |
|          |       |       |       |     |         | HADH           | 15.16 | 19.22 | 0.34 | 1.3 | 5.0E-05 |
|          |       |       |       |     |         | CASP6,PLA2G12A | 17.63 | 22.34 | 0.34 | 1.3 | 2.0E-03 |
|          |       |       |       |     |         | ATF7IP2        | 1.34  | 1.70  | 0.34 | 1.3 | 2.1E-03 |
|          |       |       |       |     |         | C7orf63        | 4.26  | 5.40  | 0.34 | 1.3 | 1.0E-04 |
|          |       |       |       |     |         | FKBP14         | 11.28 | 14.29 | 0.34 | 1.3 | 5.0E-05 |
|          |       |       |       |     |         | ZSCAN23        | 2.64  | 3.35  | 0.34 | 1.3 | 5.0E-05 |
|          |       |       |       |     |         | HDGFRP2        | 17.13 | 21.71 | 0.34 | 1.3 | 5.0E-05 |
|          |       |       |       |     |         | GALNT2         | 39.45 | 49.97 | 0.34 | 1.3 | 5.0E-05 |
|          |       |       |       |     |         | GPR155         | 0.92  | 1.17  | 0.34 | 1.3 | 1.5E-04 |
|          |       |       |       |     |         | IER5           | 5.58  | 7.07  | 0.34 | 1.3 | 5.0E-05 |
|          |       |       |       |     |         | CDH5           | 2.29  | 2.90  | 0.34 | 1.3 | 1.0E-04 |
|          |       |       |       |     |         | TMEM98         | 13.25 | 16.78 | 0.34 | 1.3 | 5.0E-05 |
|          |       |       |       |     |         | ZNF274         | 14.72 | 18.64 | 0.34 | 1.3 | 5.0E-05 |
|          |       |       |       |     |         | RHOBTB1        | 3.66  | 4.63  | 0.34 | 1.3 | 5.0E-05 |
|          |       |       |       |     |         | UNC45A         | 18.05 | 22.86 | 0.34 | 1.3 | 2.5E-04 |
|          |       |       |       |     |         | ZNF14          | 1.28  | 1.63  | 0.34 | 1.3 | 3.9E-03 |
|          |       |       |       |     |         | FZD4           | 0.99  | 1.25  | 0.34 | 1.3 | 1.5E-04 |
|          |       |       |       |     |         | CRADD          | 4.02  | 5.09  | 0.34 | 1.3 | 4.2E-03 |
|          |       |       |       |     |         | FAM208A        | 9.00  | 11.39 | 0.34 | 1.3 | 1.0E-04 |
|          |       |       |       |     |         | ALDH7A1        | 10.50 | 13.29 | 0.34 | 1.3 | 5.0E-05 |
|          |       |       |       |     |         | ZNF597         | 1.17  | 1.48  | 0.34 | 1.3 | 1.8E-03 |
|          |       |       |       |     |         | NEIL2          | 4.70  | 5.94  | 0.34 | 1.3 | 5.0E-05 |
|          |       |       |       |     |         | METTL6         | 8.64  | 10.93 | 0.34 | 1.3 | 3.5E-03 |
|          |       |       |       |     |         | SF3B2          | 52.23 | 66.07 | 0.34 | 1.3 | 5.0E-05 |

|  |  |  |  |  |  |  |          |       |        |      |     |         |
|--|--|--|--|--|--|--|----------|-------|--------|------|-----|---------|
|  |  |  |  |  |  |  | WNT3     | 1.48  | 1.87   | 0.34 | 1.3 | 6.0E-04 |
|  |  |  |  |  |  |  | ZYX      | 85.28 | 107.84 | 0.34 | 1.3 | 5.0E-05 |
|  |  |  |  |  |  |  | LYRM4    | 13.77 | 17.41  | 0.34 | 1.3 | 5.0E-05 |
|  |  |  |  |  |  |  | GRTP1    | 4.43  | 5.60   | 0.34 | 1.3 | 1.8E-03 |
|  |  |  |  |  |  |  | SPECC1   | 17.30 | 21.87  | 0.34 | 1.3 | 1.5E-04 |
|  |  |  |  |  |  |  | FICD     | 4.95  | 6.26   | 0.34 | 1.3 | 5.0E-05 |
|  |  |  |  |  |  |  | DEPDC1B  | 7.69  | 9.71   | 0.34 | 1.3 | 5.0E-05 |
|  |  |  |  |  |  |  | C9orf78  | 14.15 | 17.87  | 0.34 | 1.3 | 5.0E-05 |
|  |  |  |  |  |  |  | SETD7    | 16.48 | 20.81  | 0.34 | 1.3 | 5.0E-05 |
|  |  |  |  |  |  |  | GREM1    | 28.70 | 36.25  | 0.34 | 1.3 | 1.5E-04 |
|  |  |  |  |  |  |  | CEP112   | 2.84  | 3.59   | 0.34 | 1.3 | 5.0E-05 |
|  |  |  |  |  |  |  | ITPR2    | 2.44  | 3.08   | 0.34 | 1.3 | 5.0E-05 |
|  |  |  |  |  |  |  | MRFAP1L1 | 21.30 | 26.90  | 0.34 | 1.3 | 5.0E-05 |
|  |  |  |  |  |  |  | WNT7B    | 3.69  | 4.66   | 0.34 | 1.3 | 5.0E-05 |
|  |  |  |  |  |  |  | IGFBP4   | 78.19 | 98.72  | 0.34 | 1.3 | 5.0E-05 |
|  |  |  |  |  |  |  | AGBL5    | 17.23 | 21.76  | 0.34 | 1.3 | 4.1E-03 |
|  |  |  |  |  |  |  | PCSK9    | 3.95  | 4.99   | 0.34 | 1.3 | 5.0E-05 |
|  |  |  |  |  |  |  | QPCT     | 63.29 | 79.88  | 0.34 | 1.3 | 5.0E-05 |
|  |  |  |  |  |  |  | AMOTL1   | 10.04 | 12.67  | 0.34 | 1.3 | 5.0E-05 |
|  |  |  |  |  |  |  | EPB41    | 11.81 | 14.91  | 0.34 | 1.3 | 6.0E-04 |
|  |  |  |  |  |  |  | WBSCR16  | 12.09 | 15.25  | 0.34 | 1.3 | 5.0E-05 |
|  |  |  |  |  |  |  | ZFP3     | 1.49  | 1.88   | 0.34 | 1.3 | 1.0E-04 |
|  |  |  |  |  |  |  | MIR210HG | 1.93  | 2.43   | 0.33 | 1.3 | 3.8E-03 |
|  |  |  |  |  |  |  | GNAI2    | 75.53 | 95.25  | 0.33 | 1.3 | 5.0E-05 |
|  |  |  |  |  |  |  | NIPAL2   | 5.33  | 6.72   | 0.33 | 1.3 | 2.0E-04 |
|  |  |  |  |  |  |  | HCG11    | 1.76  | 2.22   | 0.33 | 1.3 | 5.0E-05 |
|  |  |  |  |  |  |  | FSCN1    | 19.57 | 24.67  | 0.33 | 1.3 | 5.0E-05 |
|  |  |  |  |  |  |  | FAM217B  | 4.05  | 5.10   | 0.33 | 1.3 | 2.0E-04 |
|  |  |  |  |  |  |  | ZNF714   | 1.33  | 1.67   | 0.33 | 1.3 | 5.0E-05 |
|  |  |  |  |  |  |  | ZNF322   | 5.90  | 7.43   | 0.33 | 1.3 | 5.0E-05 |
|  |  |  |  |  |  |  | PTMS     | 39.35 | 49.58  | 0.33 | 1.3 | 5.0E-05 |
|  |  |  |  |  |  |  | BEAN1    | 7.27  | 9.16   | 0.33 | 1.3 | 5.0E-05 |
|  |  |  |  |  |  |  | STX2     | 8.89  | 11.19  | 0.33 | 1.3 | 5.0E-05 |
|  |  |  |  |  |  |  | HABP2    | 2.78  | 3.49   | 0.33 | 1.3 | 1.0E-04 |
|  |  |  |  |  |  |  | CLIC6    | 12.43 | 15.63  | 0.33 | 1.3 | 5.0E-05 |
|  |  |  |  |  |  |  | ZNF226   | 8.19  | 10.30  | 0.33 | 1.3 | 9.0E-04 |
|  |  |  |  |  |  |  | ITGB2    | 4.96  | 6.24   | 0.33 | 1.3 | 5.0E-05 |
|  |  |  |  |  |  |  | ACO2     | 31.61 | 39.74  | 0.33 | 1.3 | 3.3E-03 |



|  |  |  |  |  |  |           |        |        |      |     |         |
|--|--|--|--|--|--|-----------|--------|--------|------|-----|---------|
|  |  |  |  |  |  | PAXBP1    | 13.19  | 16.57  | 0.33 | 1.3 | 1.5E-03 |
|  |  |  |  |  |  | AARS2     | 3.10   | 3.89   | 0.33 | 1.3 | 5.0E-05 |
|  |  |  |  |  |  | PQLC3     | 4.28   | 5.38   | 0.33 | 1.3 | 3.0E-04 |
|  |  |  |  |  |  | PLD2      | 6.42   | 8.06   | 0.33 | 1.3 | 5.0E-05 |
|  |  |  |  |  |  | ATXN1     | 6.41   | 8.05   | 0.33 | 1.3 | 1.0E-04 |
|  |  |  |  |  |  | ITGAV     | 36.15  | 45.40  | 0.33 | 1.3 | 5.0E-05 |
|  |  |  |  |  |  | ZNF329    | 3.41   | 4.28   | 0.33 | 1.3 | 5.0E-05 |
|  |  |  |  |  |  | SDC4      | 259.04 | 325.32 | 0.33 | 1.3 | 5.0E-05 |
|  |  |  |  |  |  | ZNF416    | 2.11   | 2.64   | 0.33 | 1.3 | 1.8E-03 |
|  |  |  |  |  |  | VMP1      | 82.54  | 103.64 | 0.33 | 1.3 | 1.0E-04 |
|  |  |  |  |  |  | NUDT16    | 6.93   | 8.70   | 0.33 | 1.3 | 1.8E-03 |
|  |  |  |  |  |  | PEBP1     | 72.94  | 91.54  | 0.33 | 1.3 | 1.0E-04 |
|  |  |  |  |  |  | PPIP5K2   | 11.75  | 14.74  | 0.33 | 1.3 | 1.5E-04 |
|  |  |  |  |  |  | SMC4      | 9.26   | 11.61  | 0.33 | 1.3 | 1.0E-04 |
|  |  |  |  |  |  | KCTD12    | 2.15   | 2.70   | 0.33 | 1.3 | 5.0E-05 |
|  |  |  |  |  |  | TMEM170B  | 1.09   | 1.37   | 0.33 | 1.3 | 5.0E-05 |
|  |  |  |  |  |  | SNCG      | 7.39   | 9.27   | 0.33 | 1.3 | 3.8E-03 |
|  |  |  |  |  |  | MCM3      | 8.88   | 11.13  | 0.33 | 1.3 | 5.0E-05 |
|  |  |  |  |  |  | FARP1     | 47.79  | 59.90  | 0.33 | 1.3 | 4.0E-04 |
|  |  |  |  |  |  | FAM115A   | 5.96   | 7.47   | 0.33 | 1.3 | 5.0E-05 |
|  |  |  |  |  |  | TRIM45    | 1.12   | 1.41   | 0.33 | 1.3 | 5.6E-03 |
|  |  |  |  |  |  | IGF1R     | 5.33   | 6.68   | 0.33 | 1.3 | 1.0E-04 |
|  |  |  |  |  |  | TBL1X     | 9.82   | 12.30  | 0.33 | 1.3 | 1.5E-04 |
|  |  |  |  |  |  | CHN2      | 1.24   | 1.55   | 0.32 | 1.3 | 7.0E-03 |
|  |  |  |  |  |  | AMT,NICN1 | 5.90   | 7.40   | 0.32 | 1.3 | 5.0E-05 |
|  |  |  |  |  |  | PHPT1     | 36.87  | 46.17  | 0.32 | 1.3 | 5.0E-05 |
|  |  |  |  |  |  | IKBIP     | 12.45  | 15.60  | 0.32 | 1.3 | 5.0E-05 |
|  |  |  |  |  |  | ZSCAN16   | 4.93   | 6.18   | 0.32 | 1.3 | 1.5E-03 |
|  |  |  |  |  |  | CAPN5     | 3.79   | 4.75   | 0.32 | 1.3 | 5.0E-05 |
|  |  |  |  |  |  | FDPS      | 80.92  | 101.32 | 0.32 | 1.3 | 1.2E-03 |
|  |  |  |  |  |  | ANXA7     | 52.13  | 65.26  | 0.32 | 1.3 | 5.0E-05 |
|  |  |  |  |  |  | MAGI3     | 1.83   | 2.29   | 0.32 | 1.3 | 5.0E-05 |
|  |  |  |  |  |  | LOC401320 | 4.01   | 5.02   | 0.32 | 1.3 | 5.0E-05 |
|  |  |  |  |  |  | EPAS1     | 68.12  | 85.27  | 0.32 | 1.3 | 1.5E-04 |
|  |  |  |  |  |  | PEAR1     | 1.97   | 2.47   | 0.32 | 1.3 | 1.0E-04 |
|  |  |  |  |  |  | SH3D19    | 10.52  | 13.16  | 0.32 | 1.3 | 2.0E-04 |
|  |  |  |  |  |  | OSMR      | 62.39  | 78.04  | 0.32 | 1.3 | 5.0E-05 |
|  |  |  |  |  |  | ORC6      | 3.56   | 4.45   | 0.32 | 1.3 | 1.0E-03 |

|  |  |  |  |  |  |  |          |        |        |      |            |         |
|--|--|--|--|--|--|--|----------|--------|--------|------|------------|---------|
|  |  |  |  |  |  |  | HSPA2    | 3.87   | 4.84   | 0.32 | <b>1.3</b> | 5.0E-05 |
|  |  |  |  |  |  |  | SERPINB6 | 46.11  | 57.67  | 0.32 | <b>1.3</b> | 1.0E-04 |
|  |  |  |  |  |  |  | LSM4     | 28.05  | 35.09  | 0.32 | <b>1.3</b> | 5.0E-05 |
|  |  |  |  |  |  |  | TRIM47   | 4.21   | 5.26   | 0.32 | <b>1.3</b> | 3.5E-04 |
|  |  |  |  |  |  |  | PPP1R14B | 101.79 | 127.29 | 0.32 | <b>1.3</b> | 1.0E-04 |
|  |  |  |  |  |  |  | TCTN1    | 9.91   | 12.39  | 0.32 | <b>1.3</b> | 1.5E-04 |
|  |  |  |  |  |  |  | ERGIC2   | 18.62  | 23.28  | 0.32 | <b>1.3</b> | 4.4E-03 |
|  |  |  |  |  |  |  | CPNE2    | 9.68   | 12.10  | 0.32 | <b>1.3</b> | 5.0E-05 |
|  |  |  |  |  |  |  | IGIP     | 3.31   | 4.14   | 0.32 | <b>1.3</b> | 5.0E-05 |
|  |  |  |  |  |  |  | AAMDC    | 13.09  | 16.37  | 0.32 | <b>1.3</b> | 1.1E-02 |

**Supplementary Table S V. Statistically over-represented processes, relevant to epididymis epithelial function from DAVID analysis of the 1006 genes repressed by at least 1.3-fold (FPKM  $\geq$  0.3) in PAX2-knockdown versus control caput HEE cells.**

|    | Term                                                               | PValue  | Genes                                                                                                                                                                                                                                          |
|----|--------------------------------------------------------------------|---------|------------------------------------------------------------------------------------------------------------------------------------------------------------------------------------------------------------------------------------------------|
| 1  | GO:0060337~type I interferon signaling pathway                     | 3.6E-21 | IFITM1, IFITM2, OAS3, RSAD2, OAS1, OAS2, IFI35, ISG20, ISG15, XAF1, MX1, MX2, BST2, HLA-A, SAMHD1, HLA-C, HLA-B, STAT1, HLA-E, PSMB8, HLA-F, STAT2, IFIT3, IFIT2, OASL, IFIT1, IFI27, IRF7, IRF8, IFI6                                         |
| 2  | GO:0045071~negative regulation of viral genome replication         | 2.2E-12 | BST2, IFITM1, IFITM2, OAS3, RSAD2, APOBEC3G, OAS1, PARP10, SRPK1, ISG20, PLSCR1, OASL, IFIT1, ISG15, C19ORF66, SLPI, EIF2AK2, MX1                                                                                                              |
| 3  | GO:0051607~defense response to virus                               | 8.1E-12 | IFITM1, IFITM2, F2RL1, OAS3, RSAD2, OAS1, APOBEC3G, IL33, OAS2, ISG20, CXCL10, NLRC5, IL23A, ISG15, C19ORF66, MX1, MX2, POLR3G, IL6, BST2, HERC5, SAMHD1, STAT1, STAT2, IFIT3, PLSCR1, IFIT2, IFIT1, OASL, UNC13D, KCNJ8, IFIT5, EIF2AK2, GBP1 |
| 4  | GO:0052697~xenobiotic glucuronidation                              | 3.5E-10 | UGT1A7, UGT1A10, UGT1A6, UGT1A9, UGT1A8, UGT1A3, UGT1A5, UGT1A4, UGT1A1                                                                                                                                                                        |
| 5  | GO:0060333~interferon-gamma-mediated signaling pathway             | 1.3E-09 | NMI, OAS3, HLA-A, IFI30, OAS1, HLA-C, OAS2, HLA-B, STAT1, HLA-E, HLA-F, B2M, OASL, IRF7, IRF8, CAMK2D, JAK2, HLA-DPB1, PTAFR, GBP1                                                                                                             |
| 6  | GO:2001030~negative regulation of cellular glucuronidation         | 6.2E-09 | UGT1A7, UGT1A10, UGT1A6, UGT1A9, UGT1A8, UGT1A3, UGT1A4, UGT1A1                                                                                                                                                                                |
| 7  | GO:1904224~negative regulation of glucuronosyltransferase activity | 6.2E-09 | UGT1A7, UGT1A10, UGT1A6, UGT1A9, UGT1A8, UGT1A3, UGT1A4, UGT1A1                                                                                                                                                                                |
| 8  | GO:0045922~negative regulation of fatty acid metabolic process     | 2.7E-08 | UGT1A7, UGT1A10, UGT1A6, UGT1A9, UGT1A8, UGT1A3, UGT1A4, UGT1A1                                                                                                                                                                                |
| 9  | GO:0009615~response to virus                                       | 1.2E-07 | IFIH1, IFITM1, BST2, CYP1A1, IFITM2, DUOX2, OAS3, RSAD2, OAS1, OAS2, PIM2, ISG20, DDX58, IFIT3, IFIT2, OASL, IFIT1, MYD88, IRF7, EIF2AK2, MX1, MX2                                                                                             |
| 10 | GO:0015020~glucuronosyltransferase activity                        | 7.9E-07 | CSGALNACT1, UGT1A7, UGT1A10, UGT1A6, UGT1A9, B3GAT3, UGT1A8, UGT1A3, UGT1A5, UGT1A4, UGT1A1                                                                                                                                                    |
| 11 | GO:0001972~retinoic acid binding                                   | 8.3E-07 | UGT1A7, UGT1A10, UGT1A6, UGT1A9, UGT1A8, LRAT, UGT1A3, UGT1A4, CRABP2, UGT1A1                                                                                                                                                                  |
| 12 | GO:0042573~retinoic acid metabolic process                         | 2.0E-06 | UGT1A7, ALDH8A1, UGT1A9, UGT1A8, LRAT, UGT1A3, CRABP2, UGT1A1                                                                                                                                                                                  |
| 13 | GO:0052695~cellular glucuronidation                                | 6.2E-06 | UGT1A7, UGT1A10, UGT1A6, UGT1A9, UGT1A8, UGT1A3, UGT1A4, UGT1A1                                                                                                                                                                                |

|    |                                                                                                              |         |                                                                                                                                                                                                                                                                                                                                                                                                                                                                                                                                                                                                                                                                                                                                                                                                                 |
|----|--------------------------------------------------------------------------------------------------------------|---------|-----------------------------------------------------------------------------------------------------------------------------------------------------------------------------------------------------------------------------------------------------------------------------------------------------------------------------------------------------------------------------------------------------------------------------------------------------------------------------------------------------------------------------------------------------------------------------------------------------------------------------------------------------------------------------------------------------------------------------------------------------------------------------------------------------------------|
| 14 | GO:0052696~flavonoid glucuronidation                                                                         | 6.9E-06 | UGT1A7, UGT1A10, UGT1A6, UGT1A9, UGT1A8, UGT1A3, UGT1A5, UGT1A4, UGT1A1                                                                                                                                                                                                                                                                                                                                                                                                                                                                                                                                                                                                                                                                                                                                         |
| 15 | GO:0002474~antigen processing and presentation of peptide antigen via MHC class I                            | 1.1E-05 | ABCB9, SEC31A, TAP2, TAP1, HLA-A, HLA-C, HLA-B, HLA-E, HLA-F, B2M                                                                                                                                                                                                                                                                                                                                                                                                                                                                                                                                                                                                                                                                                                                                               |
| 16 | GO:0005524~ATP binding                                                                                       | 1.5E-05 | KIFC2, RPS6KB1, PRKX, KIFC3, NLRC5, CSNK2A1, WNK4, MAP3K8, MLKL, STK39, MAP2K6, TWF2, STK24, ABCC10, PIM2, MARK3, RENBP, ATP2C1, PI4K2A, ROR2, EIF2AK2, ABCA7, IFIH1, ENPP1, PFKFB4, NEK3, GNE, TDRD9, OAS3, MAP4K2, CTPS1, UBA5, OAS1, OAS2, MAPKAPK2, UHMK1, CMPK2, MOV10, DDX60L, DYRK4, ENTPD3, DYRK3, DHX8, ABCB9, SMCHD1, KIF3A, MYO1C, MYO1D, UBE2L6, AK5, ABCB6, RIMKLB, DDX58, HYOU1, EPHA4, OASL, KCNJ8, DYRK1A, PIP4K2A, CLCN4, DDX52, ATAD2B, HELZ2, ATP10A, DICER1, HELZ, ATP10D, CAD, TTLL7, CKB, WARS, MCM9, NOD1, PAK4, ATP8B2, TRPV4, RTEL1, PRKCA, ABCE1, TRPM6, CDK8, MINK1, PRKCE, SRPK1, NLRP1, PRKD2, STYK1, UBE2M, FARSA, KSR1, PRKD3, UBE2Z, ABCD1, BRSK1, KIF7, PTK2B, TAP2, TAP1, CAMK2D, HSPA5, PAPSS1, NPR1, ACLY, ATP1A1, DGKI, UBE2Q1, RPS6KA5, RPS6KA6, PYGL, ARAF, ATP8A2, JAK2 |
| 17 | GO:0006955~immune response                                                                                   | 2.0E-05 | CSF3, TNFRSF6B, CSF2, IL1R1, ENPP1, IFITM2, IL19, MAP4K2, OAS3, OAS1, CX3CL1, OAS2, CXCL11, CXCL10, B2M, CCL20, SEMA7A, IL1B, HLA-DPB1, HLA-DOB, CD7, IL18R1, SECTM1, IL6, IL1RN, HLA-A, SAMHD1, HLA-C, TNFRSF14, HLA-B, CTSS, HLA-E, TINAG, PDCD1LG2, HLA-F, CCR8, TNFSF13B, CD274, IRF8, SLPI, CTSC, IFI6, PTAFR                                                                                                                                                                                                                                                                                                                                                                                                                                                                                              |
| 18 | GO:0035456~response to interferon-beta                                                                       | 3.4E-05 | PLSCR1, BST2, IFITM1, IFITM2, XAF1, STAT1                                                                                                                                                                                                                                                                                                                                                                                                                                                                                                                                                                                                                                                                                                                                                                       |
| 19 | GO:0002480~antigen processing and presentation of exogenous peptide antigen via MHC class I, TAP-independent | 3.4E-05 | HLA-A, HLA-C, HLA-B, HLA-E, HLA-F, B2M                                                                                                                                                                                                                                                                                                                                                                                                                                                                                                                                                                                                                                                                                                                                                                          |
| 20 | GO:0020037~heme binding                                                                                      | 5.3E-05 | CYP3A5, CYP3A7, CYP2J2, CYP1A1, CYP2B6, FA2H, CYP2S1, DUOX2, CYP4F11, IDO1, CYB5B, ABCB6, AMBP, NR1D1, CYP27A1, KLKB1, GUCY1A3, GUCY1B3, JAK2, CYP4F3                                                                                                                                                                                                                                                                                                                                                                                                                                                                                                                                                                                                                                                           |
| 21 | GO:0035455~response to interferon-alpha                                                                      | 6.6E-05 | LAMP3, BST2, IFITM1, IFITM2, EIF2AK2, MX2                                                                                                                                                                                                                                                                                                                                                                                                                                                                                                                                                                                                                                                                                                                                                                       |
| 22 | GO:0051552~flavone metabolic process                                                                         | 8.9E-05 | UGT1A7, UGT1A10, UGT1A9, UGT1A8, UGT1A1                                                                                                                                                                                                                                                                                                                                                                                                                                                                                                                                                                                                                                                                                                                                                                         |
| 23 | GO:0042612~MHC class I protein complex                                                                       | 1.0E-04 | HLA-A, HLA-C, HLA-B, HLA-E, HLA-F, B2M                                                                                                                                                                                                                                                                                                                                                                                                                                                                                                                                                                                                                                                                                                                                                                          |
| 24 | GO:0019899~enzyme binding                                                                                    | 3.3E-04 | CSF3, ABCD1, EGLN1, CAD, UGT1A7, UGT1A6, UGT1A9, BLZF1, ANK1, UGT1A8, GSTM4, UGT1A3, ANK2, UGT1A4, SCNM1, HSPA5, SCARB2, PRKCA, CYP1A1, TNFAIP8L2-SCNM1, PRKCE, STAT1,                                                                                                                                                                                                                                                                                                                                                                                                                                                                                                                                                                                                                                          |

|    |                                                     |         |                                                                                                                                                                                                                                                                                                                                                                                                                                                                                                                                                                                                                                                                                                                                                                                                                                                                                                                                                                                                                                                                                 |
|----|-----------------------------------------------------|---------|---------------------------------------------------------------------------------------------------------------------------------------------------------------------------------------------------------------------------------------------------------------------------------------------------------------------------------------------------------------------------------------------------------------------------------------------------------------------------------------------------------------------------------------------------------------------------------------------------------------------------------------------------------------------------------------------------------------------------------------------------------------------------------------------------------------------------------------------------------------------------------------------------------------------------------------------------------------------------------------------------------------------------------------------------------------------------------|
|    |                                                     |         | UGT1A1, SIRT1, LGALS9, NLRP1, UGT1A10, PLSCR1, PLSCR4, SLPI, ZNHIT6, CPSF1, GBP1                                                                                                                                                                                                                                                                                                                                                                                                                                                                                                                                                                                                                                                                                                                                                                                                                                                                                                                                                                                                |
| 25 | GO:0009813~flavonoid biosynthetic process           | 3.4E-04 | UGT1A7, UGT1A10, UGT1A6, UGT1A3, UGT1A5, UGT1A4, UGT1A1                                                                                                                                                                                                                                                                                                                                                                                                                                                                                                                                                                                                                                                                                                                                                                                                                                                                                                                                                                                                                         |
| 26 | GO:0006954~inflammatory response                    | 4.2E-04 | TNFRSF6B, C3AR1, NMI, ZNF580, F2RL1, IL19, TAC1, MAPKAPK2, CXCL11, CXCL10, S1PR3, NOD1, MYD88, IL23A, CCL20, SEMA7A, IL1B, NR1H4, BLNK, SCG2, HAVCR2, NFKBIZ, IL6, GBP5, CYP4F11, TNFRSF14, PTGFR, NLRP1, LGALS9, CHST1, RPS6KA5, HDAC5, TNFAIP6, APOL3, THEMIS2, PTAFR                                                                                                                                                                                                                                                                                                                                                                                                                                                                                                                                                                                                                                                                                                                                                                                                         |
| 27 | GO:0016020~membrane                                 | 4.4E-04 | SLC22A18, QPCTL, SNCA, RRAD, RCE1, JAG1, ZNRF1, RNF213, B2M, DAB1, ST3GAL4, WNK4, SLC2A2, SEMA7A, FNDC3A, FRS2, GBP5, BST2, CMAS, STK24, MTA2, UGCG, LRRC1, HLA-A, HLA-C, HLA-B, MOGS, HLA-E, PNPLA6, HLA-F, CD38, UNC13D, ATP2C1, ASPHD2, PI4K2A, NEU1, BTN3A3, EIF2AK2, EMP3, XRN1, BTN3A2, ARL6IP1, IL1R1, IFITM1, ENPP4, PNPT1, CTPS1, ACP2, NAPA, OAS2, ARFGF2, CAPZB, IL12RB2, NPHP4, LGALS3BP, RAC2, PPP1R3F, HLA-DPB1, SCARB2, SLC30A7, PTPN6, MYO1C, MRC2, SLCO2B1, HYOU1, APOL3, OASL, ATP6V0E2, B3GAT3, LAMP3, PARP9, DDX52, KCNJ15, CYB5R2, SLC15A1, HELZ2, EDC4, HELZ, EPS15L1, CAD, CHPF2, SPRY4, DNAJC13, PTGES, HPSE, CHST12, PIK3AP1, DENND5B, SLC1A1, AGAP3, CEACAM1, DPP4, ABCE1, FLOT1, CYB5B, LMBRD2, TMEM38B, SLC26A6, TNFSF13B, KHSRP, CTSC, FARSA, KSR1, CPSF2, SEC23B, PTAFR, KRT6A, RAP1GAP, ABCD1, FUT6, GDAP1, BET1, CDKAL1, HECA, RAB42, TUBGCP6, DHCR7, TAP2, TAP1, CAMK2D, HSPA5, APBA1, PSTPIP2, CD7, CNNM3, NCDN, NLGN2, ATP1A1, ACLY, DRG1, CPT1A, TMPRSS4, SLC16A3, PEX11B, PLSCR1, SLC6A9, ITPRIPL1, SLC16A6, SLC17A1, JAK2, APBB2, SLC15A3 |
| 28 | GO:0001730~2'-5'-oligoadenylate synthetase activity | 4.8E-04 | OASL, OAS3, OAS1, OAS2                                                                                                                                                                                                                                                                                                                                                                                                                                                                                                                                                                                                                                                                                                                                                                                                                                                                                                                                                                                                                                                          |
| 29 | GO:0016324~apical plasma membrane                   | 5.4E-04 | ABCA7, SLC22A18, CLDN4, DUOX2, RDX, JAG1, ENPEP, AQP1, SLC52A3, NOD1, ANK2, SLC2A2, TRPV4, STK39, SLC1A1, MUC13, CEACAM1, DPP4, KCNE4, PARD6B, TRPM6, BST2, FLOT1, ATP1A1, SLCO2B1, SLC26A6, CD34, PDZK1, SLC46A1                                                                                                                                                                                                                                                                                                                                                                                                                                                                                                                                                                                                                                                                                                                                                                                                                                                               |
| 30 | GO:0045087~innate immune response                   | 5.7E-04 | TNFAIP8L2, IFIH1, F2RL1, MAP4K2, TRIM14, TAC1, APOBEC3G, SIRPB1, B2M, NLRC5, IL23A, MYD88, NOD1, FGA, PTK2B, FGB, MX1, MX2, NR1H4, ZBP1, HAVCR2, POLR3G, F12, BST2, NCF2, HERC5, HLA-C, SERPING1, HLA-B, HLA-E, NLRP1, SRPK1, DDX58, STYK1, IRF7, IFIT5, SLPI, JAK2, EIF2AK2                                                                                                                                                                                                                                                                                                                                                                                                                                                                                                                                                                                                                                                                                                                                                                                                    |

|    |                                                               |         |                                                                                                                                                                                                                                                                                                                                                                                                                                                                                                                                                                                                                                                                       |
|----|---------------------------------------------------------------|---------|-----------------------------------------------------------------------------------------------------------------------------------------------------------------------------------------------------------------------------------------------------------------------------------------------------------------------------------------------------------------------------------------------------------------------------------------------------------------------------------------------------------------------------------------------------------------------------------------------------------------------------------------------------------------------|
| 31 | GO:0004672~protein kinase activity                            | 6.0E-04 | NEK3, MAP4K2, RPS6KB1, CAD, BRSK1, MAPKAPK2, CSNK2A1, WNK4, PAK4, MAP3K8, DYRK4, DYRK3, STK39, MLKL, MAP2K6, PRKCA, STK24, CDK8, NPR1, MINK1, PIM2, PRKCE, SRPK1, RPS6KA5, RPS6KA6, PRKD2, EPHA4, STYK1, DYRK1A, ARAF, ROR2, JAK2, EIF2AK2, KSR1                                                                                                                                                                                                                                                                                                                                                                                                                      |
| 32 | GO:0032496~response to lipopolysaccharide                     | 6.2E-04 | TNFRSF6B, CYP1A1, SNCA, TAC1, TNFRSF14, RPS6KB1, IDO1, MAPKAPK2, DCN, CXCL11, PTGFR, UGT1A1, LGALS9, CXCL10, IL12RB2, PTGES, KCNJ8, SLPI, JAK2, CASP1                                                                                                                                                                                                                                                                                                                                                                                                                                                                                                                 |
| 33 | GO:0005615~extracellular space                                | 7.2E-04 | MASP1, FAM3B, SNCA, IL19, ANPEP, GGT1, FGF12, VGF, CXCL11, IL11, CXCL10, B2M, CKB, KRT81, AZGP1, METRN, WISP1, DMXL2, SERPINE2, HIST1H2BK, SEMA7A, PPP1R1A, SEMA3F, SERPINE1, IL1B, SEMA3A, TGS1, EBI3, MUC13, GHR, F12, EGFL7, ARTN, SERPING1, PIGR, CTSS, TCN2, AMBP, PTHLH, TNFAIP6, AMH, TNFSF13B, HIST2H2BE, SERPINB7, CPXM1, SLPI, CTSC, ADAMTS3, TG, CSF3, TNFRSF6B, CSF2, ENPP1, LUM, OAS3, WDR60, TAC1, RDX, CX3CL1, DCN, IL33, GPRC5B, TIMP2, PRSS8, MOV10, LGALS3BP, CCL20, FGA, FGB, RNASET2, KLKB1, AGT, MRPL18, EGF, FGFBP1, QSOX1, SCG2, ANGPTL4, SECTM1, IL6, IL1RN, PPFIBP2, NLGN2, TINAG, LGALS9, TSLP, COL14A1, EPGN, ACE2, LIPC, GDF15, SST, CHR2 |
| 34 | GO:0031115~negative regulation of microtubule polymerization  | 1.1E-03 | EML2, INPP5J, SNCA, CLIP3, CAPZB                                                                                                                                                                                                                                                                                                                                                                                                                                                                                                                                                                                                                                      |
| 35 | GO:0015833~peptide transport                                  | 1.2E-03 | ABCB9, DISP1, TAP1, SLC15A3                                                                                                                                                                                                                                                                                                                                                                                                                                                                                                                                                                                                                                           |
| 36 | GO:0000139~Golgi membrane                                     | 1.4E-03 | ABCA7, SEC31A, RAP1GAP, QPCTL, FUT6, BET1, MAP4K2, NAPA, CHPF2, ARFGEF2, B2M, ST6GALNAC5, BLZF1, ECE2, ST3GAL2, ST6GALNAC4, ST3GAL5, GNPTAB, ST3GAL4, CHST12, B3GNT7, TNKS, HLA-DPB1, FNDC3A, MBTPS2, GBP5, UGCG, HLA-A, HACE1, HLA-C, HLA-B, FZD5, HLA-E, ABCB6, CHST1, HLA-F, CSGALNACT1, PJA2, RND3, B3GAT3, CNIH3, ATP2C1, ATP8A2, CTSC, GBP4, SEC23B, GBP1                                                                                                                                                                                                                                                                                                       |
| 37 | GO:0032729~positive regulation of interferon-gamma production | 1.9E-03 | HAVCR2, IL12RB2, IL18R1, IL23A, IRF8, HLA-A, IL1B, HLA-DPB1, FZD5                                                                                                                                                                                                                                                                                                                                                                                                                                                                                                                                                                                                     |

|    |                                              |         |                                                                                                                                                                                                                                                                                                                                                                                                                                                                                                                                                                                                                                                                                                                                                                                                                                                                                                                                                                                                                                                                                                                                                                                                                                                                                                                                                                                                                                                                                                                                                                                                                        |
|----|----------------------------------------------|---------|------------------------------------------------------------------------------------------------------------------------------------------------------------------------------------------------------------------------------------------------------------------------------------------------------------------------------------------------------------------------------------------------------------------------------------------------------------------------------------------------------------------------------------------------------------------------------------------------------------------------------------------------------------------------------------------------------------------------------------------------------------------------------------------------------------------------------------------------------------------------------------------------------------------------------------------------------------------------------------------------------------------------------------------------------------------------------------------------------------------------------------------------------------------------------------------------------------------------------------------------------------------------------------------------------------------------------------------------------------------------------------------------------------------------------------------------------------------------------------------------------------------------------------------------------------------------------------------------------------------------|
| 38 | GO:0001525~angiogenesis                      | 2.1E-03 | PRKCA, FZD8, EGFL7, ANPEP, RORA, ENPEP, JAG1, FZD5, ARHGAP24, SIRT1, RNF213, PRKX, PNPLA6, WARS, PRKD2, TYMP, EPGN, PTK2B, SERPINE1, EGF, CEACAM1, ANGPTL4, SCG2                                                                                                                                                                                                                                                                                                                                                                                                                                                                                                                                                                                                                                                                                                                                                                                                                                                                                                                                                                                                                                                                                                                                                                                                                                                                                                                                                                                                                                                       |
| 39 | GO:0030670~phagocytic vesicle membrane       | 2.2E-03 | ATP6V0E2, RAC2, HLA-A, HLA-C, HLA-B, HLA-E, RAB20, ATP6V0B, HLA-F, B2M                                                                                                                                                                                                                                                                                                                                                                                                                                                                                                                                                                                                                                                                                                                                                                                                                                                                                                                                                                                                                                                                                                                                                                                                                                                                                                                                                                                                                                                                                                                                                 |
| 40 | GO:0042605~peptide antigen binding           | 2.3E-03 | TAP1, HLA-A, HLA-C, HLA-B, HLA-DPB1, HLA-E, HLA-F                                                                                                                                                                                                                                                                                                                                                                                                                                                                                                                                                                                                                                                                                                                                                                                                                                                                                                                                                                                                                                                                                                                                                                                                                                                                                                                                                                                                                                                                                                                                                                      |
| 41 | GO:0035556~intracellular signal transduction | 2.4E-03 | MAP4K2, DCDC2B, BRSK1, ARFGEF2, PRKAR2B, NOD1, GMIP, STAC, RAC3, WNK4, PPP1R1A, GUCY1A3, SH2B3, STK39, SCG2, BLNK, PRKCA, PTPN6, SOCS2, MINK1, NPR1, DCDC2, DGKI, PRKCE, SRPK1, DEPDC5, RPS6KA5, PRKD2, WSB2, ARAF, JAK2, GUCY1B3, APBB2, KSR1, PRKD3                                                                                                                                                                                                                                                                                                                                                                                                                                                                                                                                                                                                                                                                                                                                                                                                                                                                                                                                                                                                                                                                                                                                                                                                                                                                                                                                                                  |
| 42 | GO:0005515~protein binding                   | 2.8E-03 | MEF2A, MASP1, PPP2R5B, LDHD, RORC, RORA, MED21, B2M, KIFC3, ISG15, SERPINE2, INTS7, PPP1R1A, MAP3K8, SERPINE1, MED27, FAM150B, CCNA1, TMEM14C, MAP2K6, CDCA4, H1F0, DDRGK1, GBP5, NCF2, CYP1A1, PTPRH, RCOR1, DCDC2, SERPING1, MARK3, UNC13D, ROR2, ADAMTS3, ZNHIT6, EIF2AK2, TNFRSF6B, DCBLD2, IL1R1, RTP4, GNAI1, RHPN1, WDR60, UBA5, ARFGEF2, ALCAM, FOXH1, NPHP4, IL23A, PROCR, ATN1, RAC3, KLKB1, TNKS, C19ORF25, TCF4, NTHL1, DHX8, KIF3A, IL1RN, UBE2L6, C16ORF87, PARP9, MAP2, ZNF114, SYTL1, GAS2L3, TAF1A, HNF1A, U2SURP, ATP10A, ATP10D, CDR2L, SIRPB1, USP18, NOD1, TRPV4, USP11, GUCY1A3, FBXL15, CCDC28A, DPP4, CEACAM1, CCDC28B, GHR, NFKBIZ, BATF2, TTC37, MXD1, SRPK1, FAM167A, IGFN1, DOK3, GUCY1B3, KSR1, RASD1, CSF2, POLA1, ABI2, RTKN, NECAB3, NECAB2, ZNF169, DAPP1, CCL20, PTK2B, DISP1, C19ORF66, DAZL, ARMCX1, MT1H, ZBP1, KCNE4, IL6, NUB1, ACLY, DGKI, TMPRSS4, RPS6KA5, FEM1C, PLSCR1, PLSCR4, ARAF, ZNF460, RNF19B, MTSS1, XPO4, ZNF580, RRAD, RPS6KB1, JAG1, CXCL11, CXCL10, IL11, PRKAR2B, AZGP1, NLRC5, IMP3, EIF4EBP2, ANK1, CSNK2A1, DAB1, ANK2, CTDSP1, STK39, FRS2, EBI3, TWF2, BST2, CHAC1, NCALD, STK24, MTA2, HLA-A, HHEX, TNFAIP6, XRN1, SLC40A1, PTRH1, IFITM1, DCDC2B, CX3CL1, IL33, MAPKAPK2, TIMP2, RABGGTB, ECE2, AMER1, FGA, FGB, DYRK4, TMEM30B, PPIL3, EGF, ANGPTL4, ABCB9, DHDDS, MYO1C, SYT11, MRC2, ACMSD, ARID3B, HACE1, DDX58, HDAC5, CDKN1C, CDKN1A, B3GAT3, DYRK1A, TDG, DNAJB2, CYB5R2, CYP2S1, OGDHL, DICER1, EDC4, PAX2, SPRY4, RAB3IP, WARS, YOD1, CASP1, SLC1A1, RTEL1, PPP2R1B, TBL1XR1, TRPM6, RAB3IL1, CDK8, LRP2BP, STXBP4, MID1IP1, TNFSF13B, PPM1K, |

|    |                            |         |                                                                                                                                                                                                                                                                                                                                                                                                                                                                                                                                                                                                                                                                                                                                                                                                                                                                                                                                                                                                                                                                                                                                                                                                                                                                                                                                                                                                                                                                                                                                                                                                                                                                                                                                                                                                                                                                                                                                                                        |
|----|----------------------------|---------|------------------------------------------------------------------------------------------------------------------------------------------------------------------------------------------------------------------------------------------------------------------------------------------------------------------------------------------------------------------------------------------------------------------------------------------------------------------------------------------------------------------------------------------------------------------------------------------------------------------------------------------------------------------------------------------------------------------------------------------------------------------------------------------------------------------------------------------------------------------------------------------------------------------------------------------------------------------------------------------------------------------------------------------------------------------------------------------------------------------------------------------------------------------------------------------------------------------------------------------------------------------------------------------------------------------------------------------------------------------------------------------------------------------------------------------------------------------------------------------------------------------------------------------------------------------------------------------------------------------------------------------------------------------------------------------------------------------------------------------------------------------------------------------------------------------------------------------------------------------------------------------------------------------------------------------------------------------------|
|    |                            |         | <p>ZFYVE26, MAPRE3, CPSF2, CPSF1, SEC23B, PHLPP2, NR3C2, EGLN1, RDX, DCN, GRAMD3, CDKAL1, PIPOX, PRSS8, NGLY1, RNF126, TMED5, KIF7, INPP5J, DNER, ADAT2, SH2B3, MYCBP, HSPA5, WDFY3, CEBPA, CNM3, WDFY1, NCDN, CEP192, SAMHD1, DRG1, UBE2Q1, AVPI1, IFIT3, PEX11B, IFIT2, IFIT1, AMDHD2, ACE2, JAK2, GDF15, THEMIS2, PRR16, SEC31A, SNCA, HIRA, LPAR2, GGT1, AQP1, ZNRF1, PRKX, MVB12A, HOOK1, BAK1, S1PR3, MYD88, STAC, SEMA7A, PLOD3, WNK4, F12, STRN3, PARP10, PIM2, HES1, DCLRE1C, RND3, KRT15, DEAF1, NEK3, ENPP1, ALDOC, OAS3, IFI30, OAS1, OAS2, UHMK1, IFI35, MOV10, CRMP1, FBXO6, NUP54, NR1H4, BLNK, TSEN54, HOMER1, EPHA4, NUP62, MLX, CSRNP1, RNF2, POMP, PDZK1, ANKRD36BP1, CRYM, KCNJ15, MITF, MITD1, CKB, TRIAP1, BLZF1, GOLGA7, AGPAT5, C4ORF33, DNAJC13, ATG2A, CCNY, ABCE1, FLOT1, HERC5, RPH3AL, CYB5B, AMBP, SENP2, STYK1, FARSA, TBX18, GADD45A, MON1A, THAP7, ETV7, NMI, RAP1GAP, ABCD1, BET1, NEO1, FAM46A, ZFP36L2, NR1D1, GNPTAB, TOE1, CD177, AGT, SEPSECS, APBA1, BCL9, IL18R1, FZD8, DLGAP1, ATP1A1, STAT1, FZD5, SNAI1, STAT2, SLC16A3, PYGL, SAMD9, PBX1, APBB2, THRA, PLXNA2, FGF14, CCDC85B, CRABP2, F2RL1, APOBEC3G, FGF12, TBC1D19, KRT81, GSTM4, MLKL, MX1, TGS1, RBM11, MX2, KRTAP2-3, SOCS2, TNFRSF14, SP140, PI4K2A, PYGO1, SNRPC, CLIP3, EMP3, GBP1, CEP97, ARL6IP1, TNFAIP8L2, IFIH1, IL22RA1, SSH1, GNE, PNPT1, MAP4K2, ELK1, NAPA, KCNS1, GMIP, TRIM69, CDYL2, TRO, ENTPD3, UBAP2L, NDRG1, SCARB2, MFAP3L, HAVCR2, PTPN6, PARD6B, SETDB2, HTT, PSMB8, PSMB9, SLAIN2, CD274, KCTD17, RFX3, ATG16L1, CHR1, TBC1D20, IFI6, HELZ2, TLN2, EPS15L1, PDCD4, PCGF2, TMEM171, HPSE, PAK4, CNTNAP1, SHC3, FAM83G, C11ORF68, PRKCA, MINK1, ARHGAP24, PRKCE, NLRP1, EML2, PRKD2, CD82, UBE2M, KHSRP, SLPI, CTSC, PRKD3, KRT6A, UBE2Z, ZC4H2, LUM, RSAD2, NCKAP5L, CCDC59, NPAS2, RASGRP3, TAP2, TAP1, NUDT21, TGM1, CAMK2D, SCG5, SCN11, NEFL, MYOF, FGFBP1, SCO2, SCG2, DTX3, SIRT1, ITPRIPL1, IRF7, IRF8, PSPC1, SH3BP1, LIPE, NTM</p> |
| 43 | GO:0043202~lysosomal lumen | 2.9E-03 | <p>NAGLU, HPSE, LUM, LGMN, RNASET2, IFI30, NEU1, ACP2, SCARB2, DCN, CTSS, TCN2</p>                                                                                                                                                                                                                                                                                                                                                                                                                                                                                                                                                                                                                                                                                                                                                                                                                                                                                                                                                                                                                                                                                                                                                                                                                                                                                                                                                                                                                                                                                                                                                                                                                                                                                                                                                                                                                                                                                     |



|    |                                                                                                             |         |                                                                                                                                                                                                |
|----|-------------------------------------------------------------------------------------------------------------|---------|------------------------------------------------------------------------------------------------------------------------------------------------------------------------------------------------|
| 44 | GO:0042493~response to drug                                                                                 | 3.2E-03 | SNCA, HMGCS1, CTPS1, RPS6KB1, SMTNL1, AQP1, TIMP2, B2M, BAK1, DAB1, PTK2B, CCNO, MAP2K6, IL6, CYP1A1, RPH3AL, ATP1A1, NDUFA10, STAT1, UGT1A1, CPT1A, KCNK3, HDAC5, CD38, AMH, CDKN1A, CA9, SST |
| 45 | GO:0001916~positive regulation of T cell mediated cytotoxicity                                              | 3.2E-03 | IL23A, HLA-A, HLA-B, HLA-E, B2M                                                                                                                                                                |
| 46 | GO:0016758~transferase activity, transferring hexosyl groups                                                | 3.3E-03 | UGT1A7, UGT1A6, UGT1A9, UGT1A8, UGT1A3, UGT1A4, UGT1A1                                                                                                                                         |
| 47 | GO:0042730~fibrinolysis                                                                                     | 3.3E-03 | F12, FGA, FGB, KLKB1, SERPINE1, SERPING1                                                                                                                                                       |
| 48 | GO:0012507~ER to Golgi transport vesicle membrane                                                           | 3.6E-03 | SEC31A, CNIH3, HLA-A, HLA-C, HLA-B, HLA-DPB1, HLA-E, HLA-F, B2M                                                                                                                                |
| 49 | GO:0005764~lysosome                                                                                         | 3.8E-03 | NAGLU, ABCB9, SYT11, LGMN, SNCA, IFI30, IL4I1, ACP2, CTSS, ZNRF1, PAX2, TINAG, DEPDC5, UNC13D, HPSE, CD34, RNASET2, IL1B, NEU1, CTSC, SCARB2, HLA-DOB                                          |
| 50 | GO:0019885~antigen processing and presentation of endogenous peptide antigen via MHC class I                | 3.8E-03 | TAP2, TAP1, HLA-A, B2M                                                                                                                                                                         |
| 51 | GO:0002481~antigen processing and presentation of exogenous protein antigen via MHC class Ib, TAP-dependent | 3.8E-03 | ABCB9, TAP2, TAP1, B2M                                                                                                                                                                         |
| 52 | GO:0030334~regulation of cell migration                                                                     | 3.9E-03 | DDX58, PARD6B, LAMA3, SERPINE2, PLXNA2, HACE1, MINK1, JAG1, SST, CEACAM1, PRKX                                                                                                                 |
| 53 | GO:0050727~regulation of inflammatory response                                                              | 4.1E-03 | IL1R1, MYD88, SEMA7A, ACE2, STK39, PIK3AP1, GGT1, JAK2, CASP1, NLRP1                                                                                                                           |
| 54 | GO:0005765~lysosomal membrane                                                                               | 4.4E-03 | ABCB9, ENPP1, GNAI1, FLOT1, ABCC10, ACP2, ANPEP, ENPEP, SLC26A11, DEPDC5, LAMP3, DNAJC13, HPSE, ZFYVE26, PI4K2A, NEU1, MCOLN1, HLA-DPB1, MFSD12, SCARB2, EGF, SLC15A3, HLA-DOB, DPP4, VPS39    |
| 55 | GO:0071222~cellular response to lipopolysaccharide                                                          | 4.5E-03 | HAVCR2, CSF3, CSF2, IL6, CMPK2, B2M, CXCL10, HDAC5, NR1D1, CCL20, PLSCR4, SERPINE1, IRF8, NR1H4                                                                                                |
| 56 | GO:0070555~response to interleukin-1                                                                        | 5.6E-03 | PRKCA, CD38, IL1R1, MYD88, SNCA, LGALS9, GHR                                                                                                                                                   |

|    |                                                                                 |         |                                                                                                                                                                                                                                                                                                                                                                                                                                                                                                                                                                                                                                                                                                                                                                                                                                                                                                                                                                                                                                                                                                                                                                                                                                                                                                                                                                                                                        |
|----|---------------------------------------------------------------------------------|---------|------------------------------------------------------------------------------------------------------------------------------------------------------------------------------------------------------------------------------------------------------------------------------------------------------------------------------------------------------------------------------------------------------------------------------------------------------------------------------------------------------------------------------------------------------------------------------------------------------------------------------------------------------------------------------------------------------------------------------------------------------------------------------------------------------------------------------------------------------------------------------------------------------------------------------------------------------------------------------------------------------------------------------------------------------------------------------------------------------------------------------------------------------------------------------------------------------------------------------------------------------------------------------------------------------------------------------------------------------------------------------------------------------------------------|
| 57 | GO:0005829~cytosol                                                              | 5.8E-03 | ALDH8A1, GDA, SEC31A, PPP2R5B, SNCA, ZNRF1, RNF213, MVB12A, HOOK1, BAK1, MYD88, ISG15, STAC, SERPINE2, WNK4, MAP3K8, CCNA1, MUC13, MAP2K6, NCF2, MARK3, DEPDC5, EIF2AK2, RBP1, PFKFB4, RHPN1, ALDOC, OAS3, HMGCs1, OAS1, UBA5, OAS2, ARFGEF2, CAPZB, IFI35, NPHP4, MOV10, RAC2, CRMP1, RAC3, FBXO6, TNKS, BLNK, GPD1, KIF3A, UBE2L6, OASL, PARP9, POMP, ANPEP, CKB, USP18, NOD1, PIK3AP1, COX19, HERC5, GMPR, FARSA, KSR1, RAP1GAP, ABCD1, ABI2, RTKN, ZFP36L2, DAPP1, PTK2B, SEPSECS, PAPSS1, APBA1, ZBP1, POLR3G, DFNA5, BAIAP2L2, NAT1, ACLY, DGKI, STAT1, STAT2, PLSCR1, RPS6KA6, PYGL, ARAF, RNF19B, THRA, CRABP2, RPS6KB1, APOBEC3G, PRKAR2B, NLRC5, ANK1, DAB1, GSTM4, CSNK2A1, ANK2, DNAJC6, IL1B, MLKL, STK39, TGS1, MX1, FNDC3A, MX2, SOCS2, CMAS, NCALD, STK24, CHAC1, RENBP, PI4K2A, PDE5A, CLIP3, XRN1, GBP1, CEP97, ARL6IP1, IFIH1, GNE, CTPS1, NAPA, MAPKAPK2, CMPK2, AMER1, GMIP, TRIM69, NDRG1, PARD6B, PTPN6, MYO1C, HTT, MYO1D, ACMSD, AK5, PSMB8, PSMB9, DDX58, CDKN1A, CAMKMT, DNAJB2, SYNGAP1, PIP4K2A, ATG16L1, DICER1, OGDHL, EDC4, CAD, PSPH, PDCD4, RAB3IP, GSR, WARS, YOD1, CASP1, SHC3, FAM83G, PRKCA, ARHGAP28, MINK1, MID1IP1, PRKCE, ARHGAP24, NLRP1, PADI1, UBE2M, KHSRP, PHLPP2, EGLN1, NGLY1, RNF126, TSC22D3, TYMP, TUBGCP6, NPAS2, INPP5J, CAMK2D, SH2B3, BDH2, XAF1, NEFL, PSTPIP2, SCLT1, WDFY1, NCDN, CEP192, IDO1, UBE2Q1, IFIT3, IFIT2, IFIT1, AMDHD2, IRF7, IRF8, JAK2, LIPE |
| 58 | GO:2000650~negative regulation of sodium ion transmembrane transporter activity | 5.9E-03 | AGT, CAMK2D, STK39, PRKCE                                                                                                                                                                                                                                                                                                                                                                                                                                                                                                                                                                                                                                                                                                                                                                                                                                                                                                                                                                                                                                                                                                                                                                                                                                                                                                                                                                                              |
| 59 | GO:0055085~transmembrane transport                                              | 6.1E-03 | MFSD7, ABCA7, ABCE1, ABCB9, SLC22A18, SLC16A10, ABCD1, SLC10A7, ABCC10, MFSD2A, SLC10A3, ABCB6, AZGP1, SLC16A6, SLC17A1, TAP2, SLC25A22, TAP1, SLC5A9, SLC25A44, SV2A, SLC15A3, SLC46A1                                                                                                                                                                                                                                                                                                                                                                                                                                                                                                                                                                                                                                                                                                                                                                                                                                                                                                                                                                                                                                                                                                                                                                                                                                |
| 60 | GO:0034341~response to interferon-gamma                                         | 6.2E-03 | BST2, IFITM1, NUB1, IFITM2, C19ORF66, SNCA                                                                                                                                                                                                                                                                                                                                                                                                                                                                                                                                                                                                                                                                                                                                                                                                                                                                                                                                                                                                                                                                                                                                                                                                                                                                                                                                                                             |
| 61 | GO:0008093~cytoskeletal adaptor activity                                        | 7.0E-03 | ANK1, BAIAP2L2, ANK2, ABI2, GAS2L1                                                                                                                                                                                                                                                                                                                                                                                                                                                                                                                                                                                                                                                                                                                                                                                                                                                                                                                                                                                                                                                                                                                                                                                                                                                                                                                                                                                     |
| 62 | GO:0010613~positive regulation of cardiac muscle hypertrophy                    | 7.2E-03 | PRKCA, MEF2A, AGT, PDE5A, CAMK2D                                                                                                                                                                                                                                                                                                                                                                                                                                                                                                                                                                                                                                                                                                                                                                                                                                                                                                                                                                                                                                                                                                                                                                                                                                                                                                                                                                                       |

|    |                                                                                                                              |         |                                                                                                                                                                                                                                                                                                                                                                                                                                                         |
|----|------------------------------------------------------------------------------------------------------------------------------|---------|---------------------------------------------------------------------------------------------------------------------------------------------------------------------------------------------------------------------------------------------------------------------------------------------------------------------------------------------------------------------------------------------------------------------------------------------------------|
| 63 | GO:0016705~oxidoreductase activity, acting on paired donors, with incorporation or reduction of molecular oxygen             | 7.2E-03 | CYP3A5, CYP2J2, CYP27A1, CYP2B6, KLKB1, CYP2S1, CYP4F11, EGLN1, CYP4F3                                                                                                                                                                                                                                                                                                                                                                                  |
| 64 | GO:0015440~peptide-transporting ATPase activity                                                                              | 7.3E-03 | ABCB9, TAP2, TAP1                                                                                                                                                                                                                                                                                                                                                                                                                                       |
| 65 | GO:0046977~TAP binding                                                                                                       | 7.3E-03 | HLA-A, HLA-C, HLA-B                                                                                                                                                                                                                                                                                                                                                                                                                                     |
| 66 | GO:0015197~peptide transporter activity                                                                                      | 7.3E-03 | DISP1, TAP2, TAP1                                                                                                                                                                                                                                                                                                                                                                                                                                       |
| 67 | GO:0002486~antigen processing and presentation of endogenous peptide antigen via MHC class I via ER pathway, TAP-independent | 7.4E-03 | HLA-A, HLA-C, HLA-B                                                                                                                                                                                                                                                                                                                                                                                                                                     |
| 68 | GO:0009311~oligosaccharide metabolic process                                                                                 | 7.4E-03 | ST6GALNAC5, ST6GALNAC4, ST3GAL2, ST3GAL5, ST3GAL4, MOGS                                                                                                                                                                                                                                                                                                                                                                                                 |
| 69 | GO:0008395~steroid hydroxylase activity                                                                                      | 8.5E-03 | CYP2J2, CYP3A7, CYP1A1, CYP27A1, CYP2B6, CYP2S1                                                                                                                                                                                                                                                                                                                                                                                                         |
| 70 | GO:0005789~endoplasmic reticulum membrane                                                                                    | 9.0E-03 | CYP3A5, SEC31A, CYB5R2, CYP2J2, CYP3A7, CYP2S1, ATP10A, RCE1, MFSD2A, ATP10D, AGPAT5, SLC35D1, PTGES, PIGH, PLOD3, ATP8B2, MX1, DDRGK1, CYP1A1, SPTLC3, FA2H, MOGS, UGT1A1, PNPLA6, PJA2, UGT1A10, LRAT, KSR1, SEC23B, ARL6IP1, HSD17B2, CYP2B6, NR3C2, BET1, ABHD4, RSAD2, CDKAL1, NECAB3, EXTL2, UGT1A7, UGT1A6, TMEM129, UGT1A9, UGT1A8, TMED5, UGT1A3, DHCR7, TAP2, UGT1A4, TAP1, HSPA5, DHDDS, CYP4F11, ABCB6, RDH10, CNIH3, CYP4F3, TBC1D20, SSR3 |
| 71 | GO:0070330~aromatase activity                                                                                                | 1.0E-02 | CYP3A5, CYP2J2, CYP3A7, CYP1A1, CYP2B6, CYP2S1                                                                                                                                                                                                                                                                                                                                                                                                          |
| 72 | GO:0031090~organelle membrane                                                                                                | 1.0E-02 | CYP3A5, RDH10, CYP2J2, CYP3A7, CYP1A1, CYP2B6, FA2H, CYP2S1, POMP, CYP4F11, CYP4F3                                                                                                                                                                                                                                                                                                                                                                      |
| 73 | GO:0042102~positive regulation of T cell proliferation                                                                       | 1.0E-02 | HAVCR2, HES1, IL6, IL23A, TNFSF13B, CD274, IL1B, HLA-DPB1, PDCD1LG2                                                                                                                                                                                                                                                                                                                                                                                     |
| 74 | GO:0015721~bile acid and bile salt transport                                                                                 | 1.0E-02 | HNF1A, SLC51B, SLCO2B1, SLC10A3, CEACAM1, NR1H4                                                                                                                                                                                                                                                                                                                                                                                                         |
| 75 | GO:0017144~drug metabolic process                                                                                            | 1.0E-02 | UGT1A7, UGT1A8, CYP1A1, CYP2B6, CAD, UGT1A1                                                                                                                                                                                                                                                                                                                                                                                                             |
| 76 | GO:0050830~defense response to Gram-positive bacterium                                                                       | 1.0E-02 | HAVCR2, IL6, NOD1, MYD88, HIST1H2BK, HIST2H2BE, HLA-A, TAC1, TNFRSF14, HLA-E, B2M                                                                                                                                                                                                                                                                                                                                                                       |
